5     **Title: Brain Angiopathy and Impaired Glucose Metabolism in Model Mice**  
  
**with Psychiatric-Related Phenotypes**

**Short title:** Angiopathy in model mice and patients with psychosis

**Authors:** Shinobu Hirai<sup>1,\*</sup>, Hideki Miwa<sup>1,2</sup>, Tomoko Tanaka<sup>1</sup>, Kazuya Toriumi<sup>3</sup>, Yasuto Kunii<sup>4</sup>, Mizuki

Hino<sup>4</sup>, Ryuta Izumi<sup>4</sup>, Atsuko Nagaoka<sup>4</sup>, Hirooki Yabe<sup>4</sup>, Tomoya Nakamachi<sup>5</sup>, Seiji Shioda<sup>6</sup>, Takashi Dan<sup>7</sup>,

10 Toshio Miyata<sup>7</sup>, Yasumasa Nishito<sup>8</sup>, Kazuhiro Suzuki<sup>3</sup>, Mitsuhiro Miyashita<sup>3</sup>, Masanari Itokawa<sup>3</sup>, Makoto

Arai<sup>3</sup>, Haruo Okado<sup>1,\*</sup>

**Affiliations:** 1, Neural Development Project, Department of Brain Development and Neural

Regeneration, Tokyo Metropolitan Institute of Medical Science, Tokyo 156-8506, Japan.

15 2, Molecular Neuropsychopharmacology Section, Department of Neuropsychopharmacology, National

Institute of Mental Health, National Center of Neurology and Psychiatry, Tokyo 187-8553, Japan.

3, Schizophrenia Research Project, Department of Psychiatry and Behavioral Sciences, Tokyo

Metropolitan Institute of Medical Science, Tokyo 156-8506, Japan.

4, Department of Neuropsychiatry, School of Medicine, Fukushima Medical University, Fukushima

20 960-1295, Japan.

5 5, Laboratory of Regulatory Biology, Graduate School of Science and, Engineering, University of Toyama,  
Toyama 930-8555, Japan.

6, Global Research Center for Innovative Life Science, Peptide Drug Innovation, Hoshi University, Tokyo  
142-8501, Japan.

7, Division of Molecular Medicine and Therapy, Tohoku University Graduate School of Medicine, Miyagi  
10 980-8575, Japan.

8, Center for Basic Technology Research, Tokyo Metropolitan Institute of Medical Science, Tokyo  
156-8506, Japan.

\*These authors contributed equally to this work.

15 Correspondence should be addressed to Shinobu Hirai and Haruo Okado, Neural Development Project,  
Department of Brain Development and Neural Regeneration, Tokyo Metropolitan Institute of Medical  
Science, Tokyo 156-8506, Japan. E-mail: hirai-sn@igakuken.or.jp (S.H.) and okado-hr@igakuken.or.jp  
(H.O.)

5    **Abstract:** Psychiatric disorders are associated with metabolic dysfunction, but it is unclear  
  
whether our current high-sugar diet contributes to pathogenesis. We demonstrate that a  
  
high-sucrose diet during adolescence induces behavioral phenotypes of psychiatric disease, such  
  
as hyperactivity, poor working memory, anxiety, and impaired sensory gating, in mice deficient  
  
for glyoxalase-1, an enzyme involved in detoxification of sucrose metabolites. The high-sucrose  
  
10    diet also induced advanced glycation end product accumulation in brain microcapillary  
  
endothelium, disrupted interneuron function and striatal dopamine release, and reduced brain  
  
glucose uptake. Aspirin protected against this angiopathy, enhanced brain glucose uptake, and  
  
prevented abnormal behavioral phenotypes. Brains from schizophrenia and bipolar disorder  
  
patients exhibited similar angiopathy. Psychiatric disorders are associated with microvascular  
  
15    brain damage, possibly due to variety of environmental stresses including metabolic stress.

**One Sentence Summary:** We demonstrate neural angiopathy and multiple endophenotypes of  
  
psychiatric disease in a mouse model of impaired glucose metabolism due to excessive sugar

5 intake and confirm neural angiopathy in postmortem brains of schizophrenia and bipolar disorder patients.

**Main Text:** In response to the global increase in dietary sugar intake, the World Health Organization recently published guidelines that addressed concerns about body weight gain and  
10 the development of dental caries(1). Body weight gain or high-sugar intake alone increases the risks of numerous chronic diseases, including diabetes, hypertension, and kidney disease.

However, there are few studies on the effects of high-sugar intake during adolescence on current and future mental health. Teenagers derive higher daily calorie intake from sugar than any other age group (~20% of total daily caloric intake)(2). Furthermore, most chronic psychiatric disorders  
15 such as schizophrenia (SZ) and bipolar disorder (BD) develop before 30 years of age(3, 4) through complex interactions between multiple genetic and environmental risk factors(5). Therefore, excessive sugar intake may contribute to the pathogenesis of psychiatric disorders during this critical prodromal period.

Dietary sugars produce advanced glycation end products (AGEs) through non-enzymatic reactions  
20 between the native molecules or intermediate metabolites (reactive carbonyl compounds) and the

5 amino groups of large biomolecules, including proteins, nucleic acids, and lipids. In addition to  
disrupting biomolecule function, these AGEs may induce inflammatory reactions through the  
receptor of AGE (RAGE). Furthermore, these reactions are self-sustaining; for example(6), AGEs  
and reactive carbonyl compounds can produce free radicals and reactive oxygen species (ROS)(7,  
8) that induce oxidative stress and facilitate additional AGE formation(9). Because of this positive  
10 feedback relationship, oxidative stress is also called “carbonyl stress”(10). There is a large body of  
evidence for elevated oxidative stress as measured by ROS accumulation and lower reduced  
glutathione (GSH) levels in patients with psychiatric disorders(11-15). This oxidative stress may  
arise in part from dysregulation of specific detoxification pathways. Glyoxalase I (GLO1), an  
antioxidant zinc metalloenzyme that protects cells from AGE toxicity by catalyzing the binding of  
15 the reactive carbonyl compound methylglyoxal to GSH to form S-lactoyl-glutathione(16, 17), is  
expressed at lower levels in depressive-state BD and major depressive disorder (MDD) patients  
compared with controls(18). Moreover, an SZ patient exhibiting poor convalescence was shown to  
harbor a frameshift mutation in *GLO1* leading to reduced enzyme activity(19, 20).

On the basis of these associations, we hypothesized that excessive sugar intake may  
20 contribute to the pathogenesis of psychiatric disorders among genetically susceptible individuals.

5 We addressed this hypothesis by generating a mouse model on the basis of the gene  $\times$  environment  
interaction ( $G \times E$ ) approach and identified angiopathy arising from AGE accumulation in  
neurovascular endothelial cells as a novel psychiatric disorder phenotype in both a mouse model of  
high glucose intake and deficient GKO1 activity as well as in brain samples from BD and SZ  
patients. Furthermore, the mouse model also demonstrated multiple behavioral and neurological  
10 phenotypes of psychiatric disease that could be ameliorated by antipsychotic or anti-inflammatory  
drug treatment.

## Results

### Behavioral phenotypes of psychiatric disease in mice on a high-sucrose diet

15 To test our hypothesis that excessive sugar intake during adolescence is an environmental risk  
factor for psychiatric-related phenotypes, we examined mice fed one of two diets containing the  
same total calories and caloric proportions of carbohydrates, fat, and proteins (Fig. 1a) but with  
either starch or sucrose as the main carbohydrate. We investigated four groups of mice fed these  
diets for 50 days immediately after weaning (from postnatal day 21 to 71, corresponding to the  
20 juvenile/adolescent stage): wild-type (WT) starch-fed mice (control, CTL), WT sucrose-fed mice

5 (environmental stressor, Env), *Glo1* heterozygous knockout starch-fed mice (genetic factor, Gen),  
and *Glo1* heterozygous knockout sucrose-fed mice ( $G \times E$ ) (Fig. 1a). Western blot analysis  
revealed that *Glo1* heterozygous mice exhibited reduced GLO1 expression in the cerebral cortices,  
including the hippocampus (Supplementary Fig. 1a,b). However, body weight trajectories were  
similar to control mice up to 11 weeks of age, indicative of normal structural development  
10 (Supplementary Fig. 1c) and obviating the effects of obesity on the observed group differences  
described below. We did not observe any significant differences in open-field locomotor activity  
(Fig. 1b), pre-pulse inhibition (PPI; a measure of sensory-motor gating) (Fig. 1d), and object  
location performance (used as a test of working memory) (Fig. 1e) among CTL, Env, and Gen  
groups. However,  $G \times E$  mice exhibited greater locomotor activity, impaired PPI, and working  
15 memory deficits compared with CTL mice (Fig. 1b, d, e). A decline in acoustic startle responses  
was observed in *Glo1* heterozygous mice fed either diet compared with WTs (Fig. 1c). In contrast,  
self-grooming, nest building, and elevated plus maze activity (a measure of general anxiety) were  
influenced by diet but not *Glo1* genotype (Fig. 1f, g, and Supplementary Fig. 2a). No differences  
were detected in social interaction among groups (Supplementary Fig. 2b).

5 Sugar is a powerful natural reward, and excessive intake during critical periods of brain  
development may produce irreversible changes in brain reward system function, including nucleus  
accumbens (NAc) activity, leading to marked changes in cognitive and behavioral control(21-24).  
Dopamine (DA) elevation within the NAc causes hyper-locomotion among mice(25), whereas DA  
depletion within the NAc suppresses amphetamine-induced hyperactivity(26, 27). Moreover, odds  
10 ratios for measures of mental distress, hyperactivity, and conduct problems were highest in  
adolescents who self-reported the greatest levels of soft drink consumption(28). Higher basal DA  
and greater amphetamine-induced release in the striatum are also cardinal characteristic of SZ(29,  
30). Therefore, we measured DA release in the NAc of our model mice using *in vivo* microdialysis  
and found both enhanced basal and amphetamine-induced release only in  $G \times E$  mice (Fig. 1h).  
15 Next, to assess whether this enhanced DA release induced the observed behavioral phenotypes, we  
examined the behavioral effects of aripiprazole, a D2 receptor partial agonist and clinical  
antipsychotic<sup>35</sup>, administered during the last 7 days (0.5 mg/kg/day) of sucrose feeding (Fig. 1a,  
i–k, and Supplementary Fig. 2c–f). Indeed, the hyper-locomotion and increased striatal DA release  
observed in  $G \times E$  mice were completely reversed by aripiprazole treatment (Fig. 1h, i). Moreover,  
20 the PPI and working memory deficits observed in  $G \times E$  mice were also partially improved by



5 aripiprazole administration (Fig. 1j, k). Conversely, the abnormalities in self-grooming, elevated plus maze activity, and nest building, phenotypes influenced only by diet, were not improved by aripiprazole treatment (Supplementary Fig.2 d–f). Therefore, aripiprazole treatment selectively improved abnormalities associated with dysregulated DA signaling in our model mouse.

## 10 **Dysfunction of parvalbumin-positive inhibitory interneurons in G × E mice**

The precisely coordinated activity of parvalbumin (PV)-positive GABAergic interneurons is crucial for the maintenance of PPI and working memory; moreover, PV neuron hypofunction induces hypersensitivity of dopaminergic neurons to psychostimulants such as amphetamine(31-34). We first examined the expression levels of PV by immunohistochemistry and Western blotting to examine if altered PV interneuron activity contributes to these psychiatric disease-associated phenotypes. The number of PV-positive cells was clearly lower in the hippocampus of sucrose-fed mice compared with starch-fed mice (Fig. 2a, b) and lowest in G × E mice (Fig. 2c, d). We measured gamma oscillations (30–45 Hz) by surface electroencephalography (EEG) as gamma oscillations are produced by synchronous activation of PV neurons to examine if this downregulation of PV was accompanied by functional abnormalities

15  
20

5 in neural activity. Increased gamma oscillation power is observed in the visual cortex and  
prefrontal cortex of animals(35, 36) and humans(37-39) during a variety of perceptual and  
cognitive tasks, and indeed such increases were observed in Ctrl, Env, and Gen groups. Consistent  
with PV interneuron dysfunction, however,  $G \times E$  mice did not exhibit an increase in the gamma  
oscillation power when approaching a novel object (Fig. 2e, f). Sucrose-fed mice also exhibited  
10 elevated baseline gamma oscillation power compared with starch-fed mice in the home cage (Fig.  
2e). These results are consistent with findings from SZ and BD patients as well as other mouse  
models of psychosis showing increased baseline gamma oscillations and decreased sensory  
stimulus-evoked gamma power(34, 40-43). Therefore, our results suggest that  $G \times E$  mice mimic  
the pathophysiological changes of PV neurons observed in psychiatric disorders.

15 To summarize, administration of a high-sucrose diet to *Glo1* heterozygous mice induces  
behavioral, histological, and pathophysiological phenotypes of psychiatric disorders, suggesting  
that excessive sucrose intake during adolescence may be a potential environmental risk factor.

### **AGE accumulation and impaired astrocyte function in $G \times E$ mice**

5 We first assessed neurocellular abnormalities associated with reduced GLO1 expression to  
investigate the mechanisms underlying the emergence of these psychiatric phenotypes, especially  
in  $G \times E$  mice. The strongest GLO1 expression was detected in astrocytes, especially those  
surrounding capillaries (Supplementary Fig. 3a–f). In contrast, we observed moderate GLO1  
expression in neurons and weak GLO1 expression in microglia and vascular endothelial cells of  
10 heterozygous mice (Supplementary Fig. 3g–i). As expected, GLO1 expression was not detected in  
the brains of *Glo1* homozygous mice (Supplementary Fig. 3m). Based on this cellular expression  
profile, enhanced AGE production or accumulation is expected in the microglia and vascular  
endothelial cells of mutant mice and especially in  $G \times E$  mice. Indeed, immunohistochemistry  
revealed a stronger fluorescent AGE immunoreactive signal (detected using an ab23722 antibody)  
15 in the vascular endothelial cells of  $G \times E$  mice compared with CTL mice (Fig. 3a–g). We also  
detected another AGE (AGE-4), a product of fructose and carbonyl compounds metabolism, in the  
microglia of sucrose-fed mice. Furthermore, microglial AGE-4 accumulation in sucrose-fed  
groups was accompanied by a greater number of processes compared with the starch-fed groups  
(Supplementary Fig. 4a, e), a morphological phenotype identified in mice under chronic stress(44,  
20 45).

5 In general, cellular damage from AGE accumulation is caused by inflammatory responses induced by RAGE activation or by loss of normal protein function following AGE-forming reactions(46).

Although these processes may alter multiple signaling pathways in both AGE-accumulating cells and surrounding cells(47), it is not possible to investigate the expression patterns of all AGEs.

Therefore, we focused on astrocytes as these cells express high levels of GLO1 (Supplementary

10 Fig. 3a–f) and demonstrate a well described reactive phenotype in response to pathogenic status including neuroinflammation characterized by enhanced expression of glial fibrillary acid protein

(GFAP). Astrocytic activation was examined in mice expressing green fluorescent protein (GFP)

under control of the *GFAP* promoter (48, 49). Strongly enhanced *GFAP* promoter function was

observed in  $G \times E$  mice, without changes in the number of GFAP-positive astrocytes (Fig. 3h–j),

15 indicating that the astrocytes in  $G \times E$  mice are in the reactive pre-condition during high-sucrose feeding(50, 51). Taken together, AGE accumulation occurs in cells with low GLO1 expression

(Fig 3a–g and Supplementary Fig. 3, 4) and astrocytes exhibit pre-inflammatory status in

GLO1-deficient mice on a high-sucrose diet (Fig 3h–j).

20 **Microcapillary angiopathy and impaired glucose intake in  $G \times E$  mice**

5 Vascular endothelial cells and astrocyte end-feet collectively form a blood–brain barrier (BBB)  
that tightly controls the parenchymal environment and neuronal function by modulating the  
selective passage of nutrients and various factors. Accumulation of AGEs in endothelium and  
astrocyte reactivity may therefore impair BBB function. To examine changes in endothelial  
function, we first conducted transcriptome analysis of the prefrontal cortex (PFC), a region  
10 strongly implicated in psychiatric impairments, using microarrays (Fig. 4a, b). The coagulation  
factor V, which is essential for the production of fibrin from fibrinogen, ranked seventh on the list  
of transcripts exhibiting more than doubled expression in  $G \times E$  mice compared with the other  
three groups (Fig. 4a, Supplementary Table 1, 2). Fibrin controls hemostasis via polymerization  
with platelets to form blood clots and deposits of this protein are indicative of endothelial  
15 abnormality regardless of the nature of the inciting event (i.e., mechanical insult, infection, or  
immunological derangements)(52). For example, in the early stage of endothelial cell impairment,  
fibrin accumulates in capillaries. We therefore investigated vascular fibrin accumulation by  
immunohistochemistry and confirmed the presence of significant fibrin accumulation on the  
vascular lumen side of endothelial cells in the brain capillaries of  $G \times E$  mice (Fig. 4c–f).

5 We speculated that the abnormal vascular endothelial cells observed in  $G \times E$  mice could alter  
glucose uptake from the plasma into the brain parenchyma. Extracellular concentrations of glucose  
in the brain parenchyma were measured under three conditions: 1) fasting, 2) 1 h after eating, and  
3) 2 h after eating. Glucose in the parenchyma was significantly lower in  $G \times E$  mice compared  
with the other groups at 1 h after eating (Fig. 4g). However, there were differences in plasma  
10 glucose and fasting plasma insulin levels among the four groups (Fig. 4h, i), indicating that this  
lower parenchymal glucose in  $G \times E$  mice is due to reduced uptake across the BBB rather than  
dysregulation of plasma glucose or insulin signaling.

### **Protective effects of chronic low-dose aspirin against behavioral abnormalities and**

#### 15 **angiopathy**

Previous reports have shown adjunct non-steroidal anti-inflammatory drug (NSAID) treatment can  
improve psychiatric disorder scores (53-56). The NSAID aspirin is used routinely for the  
prevention and alleviation of vascular-related adverse events associated with high blood pressure,  
ischemia, and cardiovascular diseases. Thus, we examined whether aspirin treatment can protect  
20 against the development of abnormal behaviors in  $G \times E$  mice (Fig. 1a, Fig. 5a–d and

5 Supplementary Fig. 5a–c). Indeed, low-dose aspirin (1 mg/kg/day) prevented deficits in working  
memory and grooming duration among  $G \times E$  mice (Fig. 5c and Supplementary Fig. 5b) and  
partially ameliorated hyper-locomotor activity, PPI deficits, poor nest building, and anxiety in the  
elevated plus maze (Fig. 5a, b, d, and Supplementary Fig. 5c). These behavioral improvements  
were accompanied by a decrease in endothelial fibrin accumulation (Fig. 5e, f) and a partial  
10 restoration of glucose intake into the brain parenchyma (Fig. 5g). Aspirin treatment also prevented  
the hyper-ramification of microglia (Supplementary Fig. 4a, e). Collectively, these results suggest  
that the prevention of fibrin accumulation in  $G \times E$  mice afforded by aspirin treatment improves  
brain glucose availability required for normal brain function.

### 15 **Angiopathy in postmortem brains of psychiatric patients with higher brain dysfunction**

We compared immunostaining of brain slices from healthy controls and patients with SZ or BD to  
examine if psychiatric patients also exhibit this angiopathic fibrin accumulation in vascular  
endothelial cells. Consistent with the  $G \times E$  mouse model, patients exhibited significantly elevated  
fibrin accumulation in the vascular endothelium (Fig. 6a-c). Thus, this fibrin-related angiopathy  
20 may contribute to disease progression, despite the absence of *GLO1* gene mutation and no specific

5 evidence for higher sugar intake compared with controls, suggesting vascular damage as a novel  
and common phenotype of psychiatric illness.

## Discussion

We demonstrate that high dietary sucrose consumption during adolescence is a potential risk  
10 factor for the development of neurofunctional and behavioral phenotypes related to psychiatric  
illness, including impaired sensory gating, interneuron dysfunction and altered cortical oscillatory  
activity, impaired working memory, elevated anxiety, hyperactivity, and greater basal and  
stimulus-evoked striatal DA release. Second, we identified endothelial fibrin accumulation  
("angiopathy") in both model mice expressing these psychiatric-related phenotypes and in the  
15 postmortem brains of SZ or BD patients. Third, we observed that glucose intake from the plasma  
into the brain parenchyma was impaired in model mice, potentially because of this angiopathy.  
Finally, we found that chronic low-dose aspirin treatment prevented the deposition of fibrin in  
capillaries, improved glucose transport, and reversed many of the behavioral phenotypes in model  
mice, suggesting sucrose-induced angiopathy as a seminal pathogenic event in mental illness.



5           A possible pathogenic mechanism for dietary sucrose-induced toxicity among *GLO1*  
heterozygous mice is illustrated in Figure 6d. Sucrose consists of glucose and fructose, and  
fructose has a potential to generate AGEs more readily than an equal amount of glucose. In  
addition, fructose generates pre-AGE carbonyl compounds such as glyceraldehyde and  
methylglyoxal(57). Moreover, in cerebrospinal fluid, fructose concentration may be controlled by  
10 mechanisms distinct from that in plasma, as levels are higher, whereas glucose levels are lower in  
this compartment compared with plasma(58, 59). Fructose-derived pre-AGE carbonyl compounds  
were presumably rapidly detoxified by GLO1 in astrocytes of WT mice and probably also *Glo1*  
heterozygous mice as these cells maintain strong GLO1 expression (Supplementary Fig. 3a, b,  
d–f). Alternatively, endothelial cells and microglia exhibit lower expression levels in WT mice and  
15 sparse expression in heterozygotes (Supplementary Fig. 3j, l), which may result in excessive  
accumulation of carbonyl compounds and AGEs, leading to a pro-inflammatory response in  
astrocytes via RAGE signaling or cytokine release from microglia(60). In turn, this perivascular  
inflammation could lead to angiopathy and poor glucose uptake, resulting in damage to various  
neuronal populations such as PV-containing interneurons(61) (Fig. 4c-f, h, i). Indeed, abnormal  
20 glucose transport was associated with endothelial cell pathology and astrocyte reactivity

5 predominantly in *Glo1* heterozygous mice fed a high-sucrose diet (Fig. 4g). Furthermore, the  
anti-inflammatory aspirin protected against the emergence of angiopathy as evidenced by reduced  
fibrin accumulation, partially restored parenchymal glucose concentration, and prevented many  
behavioral phenotypes of psychiatric illness, possibly by reducing inflammation and oxidative  
stress and by preserving PV-positive neuronal function (Fig. 5 and Supplementary Fig. 5).

10 We generated a mouse model with psychiatric-related phenotypes based on the  $G \times E$   
approach. Our  $G \times E$  model mice exhibited hyper-locomotion and excessive striatal DA release,  
both of which were completely reversed by the dose-dependent selective partial D2 receptor  
agonist aripiprazole (Fig. 1h, i). These abnormalities may be explained by the PV neuron  
dysfunction observed in  $G \times E$  mice (Fig. 2). Genetically induced PV neuron-specific  
15 hypofunction leads to an elevated excitation to inhibition ratio in the ventral hippocampus<sup>76</sup>.  
Recent studies have suggested that chronic stress also induces interneuron hypofunction, including  
of PV neurons, and concomitant hyperactivity of excitatory neurons in the hippocampus, cortex,  
and amygdala<sup>77</sup>. Hyperactivity of pyramidal neurons in the ventral hippocampus may underlie the  
aberrant modulation of midbrain DA release after exposure to an adverse environmental stimulus  
20 such as amphetamine<sup>76,78,79</sup>. Moreover, the induction of pan-interneuronal hypofunction by

5 Gad65-Cre-dependent artificial G $\beta$ i-coupled receptor (hM4Di) expression triggered  
hyper-locomotion without amphetamine stimulation<sup>35</sup>, whereas suppression of  
amphetamine-induced hyperactivity by aripiprazole was partly dependent on expression of D2  
receptors by PV neurons<sup>76</sup>. Therefore, PV neuron dysfunction induced by excessive sucrose intake  
in *Glo1* heterozygous mice may be a major cause of the DA-dependent hyper-locomotion  
10 observed in these animals (Figs. 1h, i, and 2).

This effect of angiopathy on PV neurons in G  $\times$  E mice (Fig. 4g) may stem from the unique  
electrophysiological properties of these cells. Parvalbumin-expressing interneurons exhibit a  
lower input resistance and higher-amplitude rapid after-hyperpolarization than many projection  
neurons(62, 63), and this combination of properties generates higher frequency action potentials  
15 than in other neuron types. To maintain this rapid spiking, PV neurons require high energy  
expenditure as evidenced by mitochondrial and cytochrome c oxidase enrichment (64). Therefore,  
reduced glucose within the brain parenchyma because of angiopathy may preferentially reduce PV  
neuron activity. Furthermore, robust PV neuron function is required for PPI, working memory,  
amphetamine-induced hyper-locomotion, dopamine (or 3,4-dihydroxyphenylacetic acid)  
20 regulation, and the generation of gamma oscillations(31, 33, 34, 65, 66), all of which are

5 considered core symptoms of psychiatric disorders. Indeed, reduced PV neuron number has been reported in postmortem brains of patients with psychiatric disorders such as SZ and BP(67-69).

The inhibitory activity of PV neurons is also critical under environmental stress to prevent sequela of excessive excitatory activity such as oxidative stress and inflammation(61), pathogenic processes that may be more prominent during the critical adolescent prodromal period before full  
10 brain maturation(70).

In this study, we identified capillary angiopathy in both  $G \times E$  mice and the postmortem brains of SZ and BD patients (Fig. 6a-c). Although the angiopathy observed in our model mice was probably caused by the combined high AGE production capacity of fructose (71, 72) and GLO1 deficiency, neither of these conditions were necessarily present in the patient sample. However, a  
15 variety of environmental stresses may converge to induce angiopathy. In fact, several studies have reported that stressors such as social defeat, isolation, and viral infection induce vascular defects(73-75). Furthermore, these same stressors are SZ and BD risk factors and induce PV neuron hypofunction, which is a core phenotype of these diseases(76), suggesting that angiopathy may be a common trigger for psychiatric phenotypes. Patients with SZ and BD also share common  
20 genetic risk factors as well as markers of impaired connectivity and cognition (77)(76). This

5 vascular impairment may thus be another common feature shared by SZ and BD. Although  
excessive sugar consumption was not documented in this sample cohort, patients with SZ and BD  
do consume around two-fold more sugar than age-matched healthy individuals(78, 79). More  
extensive cohort research is warranted to address high dietary sugar as a risk factor for these  
disorders and associated angiopathy.

10 Chronic treatment with low-dose aspirin partially mitigated angiopathy (fibrin deposition),  
impaired glucose transport into the brain parenchyma, and the emergence of most psychiatric  
disease-associated behavioral phenotypes, including working memory impairment (Fig. 5 and  
Supplementary Fig. 5). These effects may be attributed to irreversible inhibition of platelet  
cyclooxygenase-1 (COX-1) activity and thromboxane production, leading to reduced clot  
15 formation<sup>96,97</sup> (Fig. 5e, f), and suppression of oxidative stress through inhibition of NADPH  
oxidase (NOX)-mediated ROS production by endothelial cells and downstream inhibition of the  
TNF- $\alpha$ -, thrombin-, and AGE-activated transcriptional factor NF- $\kappa$ B<sup>98</sup>. Aspirin also stimulates  
endothelial nitric oxide synthase (eNOS) activity via lysine acetylation, resulting in the induction  
of heme oxygenase and a decrease in asymmetrical dimethylarginine. In turn, dimethylarginine  
20 serves as an eNOS inhibitor and thus improves the anti-oxidative potential of vascular cells<sup>99-102</sup>

5 and may prevent positive feedback between AGE and ROS production in our model mice<sup>11,12</sup>. As oxidative stress is a common characteristic of psychiatric disorders<sup>15-17</sup>, aspirin may provide protection against disease pathogenesis.

The high-sucrose diet also induced several abnormal phenotypes even in WT mice, including moderately impaired working memory and nest building, excessively prolonged grooming,  
10 reduced numbers of PV neurons, and elevated gamma oscillation power in the home cage (Fig. 1e–g, 2a–e). Therefore, a high-sugar diet during adolescence may adversely influence high brain function even in the absence of genetic factors predisposing to serious mental illness.

## References and Notes:

- 15 1. *Sugar Intake for adults and children* (2015).
2. N. Fidler Mis *et al.*, Sugar in Infants, Children and Adolescents: A Position Paper of the European Society for Paediatric Gastroenterology, Hepatology and Nutrition Committee on Nutrition. *J Pediatr Gastroenterol Nutr* **65**, 681-696 (2017).
- 20 3. R. C. Kessler *et al.*, Lifetime prevalence and age-of-onset distributions of DSM-IV disorders in the National Comorbidity Survey Replication. *Arch Gen Psychiatry* **62**, 593-602 (2005).
4. H. Hafner *et al.*, The epidemiology of early schizophrenia. Influence of age and gender on onset and early course. *Br J Psychiatry Suppl*, 29-38 (1994).

- 5 5. N. J. Brandon, A. Sawa, Linking neurodevelopmental and synaptic theories of mental illness through DISC1. *Nat Rev Neurosci* **12**, 707-722 (2011).
6. J. L. Wautier *et al.*, Advanced glycation end products (AGEs) on the surface of diabetic erythrocytes bind to the vessel wall via a specific receptor inducing oxidant stress in the vasculature: a link between surface-associated AGEs and diabetic complications. *Proc Natl Acad Sci U S A* **91**, 7742-7746 (1994).
- 10 7. C. M. Sena *et al.*, Methylglyoxal promotes oxidative stress and endothelial dysfunction. *Pharmacol Res* **65**, 497-506 (2012).
8. W. Cai, J. C. He, L. Zhu, C. Lu, H. Vlassara, Advanced glycation end product (AGE) receptor 1 suppresses cell oxidant stress and activation signaling via EGF receptor. *Proc Natl Acad Sci U S A* **103**, 13801-13806 (2006).
- 15 9. M. Aragno, R. Mastrocola, Dietary Sugars and Endogenous Formation of Advanced Glycation Endproducts: Emerging Mechanisms of Disease. *Nutrients* **9**, (2017).
10. T. Miyata, Alterations of non-enzymatic biochemistry in uremia, diabetes, and atherosclerosis ("carbonyl stress"). *Bull Mem Acad R Med Belg* **157**, 189-196; discussion 196-188 (2002).
- 20 11. A. Ciobica, M. Padurariu, I. Dobrin, C. Stefanescu, R. Dobrin, Oxidative stress in schizophrenia - focusing on the main markers. *Psychiatr Danub* **23**, 237-245 (2011).
- 25 12. E. Kim *et al.*, Validation of oxidative stress assay for schizophrenia. *Schizophr Res* **212**, 126-133 (2019).
13. B. K. Bitanihirwe, T. U. Woo, Oxidative stress in schizophrenia: an integrated approach. *Neurosci Biobehav Rev* **35**, 878-893 (2011).
14. A. R. Rosa *et al.*, Altered plasma glutathione levels in bipolar disorder indicates higher oxidative stress; a possible risk factor for illness onset despite normal brain-derived neurotrophic factor (BDNF) levels. *Psychol Med* **44**, 2409-2418 (2014).
- 30 15. L. G. Nucifora *et al.*, Reduction of plasma glutathione in psychosis associated with schizophrenia and bipolar disorder in translational psychiatry. *Transl Psychiatry* **7**, e1215 (2017).
- 35

- 5 16. P. J. Thornalley *et al.*, Quantitative screening of advanced glycation endproducts in cellular and extracellular proteins by tandem mass spectrometry. *Biochem J* **375**, 581-592 (2003).
17. P. J. Thornalley, Glutathione-dependent detoxification of alpha-oxoaldehydes by the glyoxalase system: involvement in disease mechanisms and  
10 antiproliferative activity of glyoxalase I inhibitors. *Chem Biol Interact* **111-112**, 137-151 (1998).
18. M. Fujimoto *et al.*, Reduced expression of glyoxalase-1 mRNA in mood disorder patients. *Neurosci Lett* **438**, 196-199 (2008).
19. M. Miyashita *et al.*, Clinical features of schizophrenia with enhanced carbonyl stress. *Schizophr Bull* **40**, 1040-1046 (2014).
- 15 20. M. Toyosima *et al.*, Schizophrenia with the 22q11.2 deletion and additional genetic defects: case history. *Br J Psychiatry* **199**, 245-246 (2011).
21. R. F. Smith, Animal models of periadolescent substance abuse. *Neurotoxicol Teratol* **25**, 291-301 (2003).
- 20 22. L. F. Vendruscolo, A. B. Gueye, M. Darnaudery, S. H. Ahmed, M. Cador, Sugar overconsumption during adolescence selectively alters motivation and reward function in adult rats. *PLoS One* **5**, e9296 (2010).
23. S. D. Iñiguez *et al.*, Nicotine exposure during adolescence induces a depression-like state in adulthood. *Neuropsychopharmacology* **34**, 1609-1624  
25 (2009).
24. E. Zamberletti *et al.*, Alterations of prefrontal cortex GABAergic transmission in the complex psychotic-like phenotype induced by adolescent delta-9-tetrahydrocannabinol exposure in rats. *Neurobiol Dis* **63**, 35-47 (2014).
25. R. D. Oades, K. Taghzouti, J. M. Rivet, H. Simon, M. Le Moal, Locomotor activity in relation to dopamine and noradrenaline in the nucleus accumbens, septal and frontal areas: a 6-hydroxydopamine study. *Neuropsychobiology* **16**,  
30 37-42 (1986).
26. P. H. Kelly, P. W. Seviour, S. D. Iversen, Amphetamine and apomorphine responses in the rat following 6-OHDA lesions of the nucleus accumbens septi  
35 and corpus striatum. *Brain Res* **94**, 507-522 (1975).



- 5 27. G. F. Koob, L. Stinus, M. Le Moal, Hyperactivity and hypoactivity produced by lesions to the mesolimbic dopamine system. *Behav Brain Res* **3**, 341-359 (1981).
28. L. Lien, N. Lien, S. Heyerdahl, M. Thoresen, E. Bjertness, Consumption of soft drinks and hyperactivity, mental distress, and conduct problems among  
10 adolescents in Oslo, Norway. *Am J Public Health* **96**, 1815-1820 (2006).
29. O. D. Howes *et al.*, Molecular imaging studies of the striatal dopaminergic system in psychosis and predictions for the prodromal phase of psychosis. *Br J Psychiatry Suppl* **51**, s13-18 (2007).
30. M. Laruelle *et al.*, Single photon emission computerized tomography imaging  
15 of amphetamine-induced dopamine release in drug-free schizophrenic subjects. *Proc Natl Acad Sci U S A* **93**, 9235-9240 (1996).
31. R. Nguyen, Investigating the Roles of Parvalbumin and Cholecystokinin Interneurons of the Ventral Hippocampus and Medial Prefrontal Cortex in Schizophrenia-Related Behaviours. (2018).
- 20 32. A. J. Murray *et al.*, Parvalbumin-positive interneurons of the prefrontal cortex support working memory and cognitive flexibility. *Sci Rep* **5**, 16778 (2015).
33. K. Fujihara *et al.*, Glutamate Decarboxylase 67 Deficiency in a Subset of GABAergic Neurons Induces Schizophrenia-Related Phenotypes. *Neuropsychopharmacology* **40**, 2475-2486 (2015).
- 25 34. T. Korotkova, E. C. Fuchs, A. Ponomarenko, J. von Engelhardt, H. Monyer, NMDA receptor ablation on parvalbumin-positive interneurons impairs hippocampal synchrony, spatial representations, and working memory. *Neuron* **68**, 557-569 (2010).
35. G. Nase, W. Singer, H. Monyer, A. K. Engel, Features of neuronal synchrony in  
30 mouse visual cortex. *J Neurophysiol* **90**, 1115-1123 (2003).
36. K. K. Cho *et al.*, Gamma rhythms link prefrontal interneuron dysfunction with cognitive inflexibility in *Dlx5/6(+/-)* mice. *Neuron* **85**, 1332-1343 (2015).
37. G. P. Krishnan *et al.*, Steady state visual evoked potential abnormalities in schizophrenia. *Clin Neurophysiol* **116**, 614-624 (2005).

- 5 38. R. Y. Cho, R. O. Konecky, C. S. Carter, Impairments in frontal cortical gamma synchrony and cognitive control in schizophrenia. *Proc Natl Acad Sci U S A* **103**, 19878-19883 (2006).
39. M. J. Minzenberg *et al.*, Gamma oscillatory power is impaired during cognitive control independent of medication status in first-episode schizophrenia. *Neuropsychopharmacology* **35**, 2590-2599 (2010).
- 10 40. M. Carlen *et al.*, A critical role for NMDA receptors in parvalbumin interneurons for gamma rhythm induction and behavior. *Mol Psychiatry* **17**, 537-548 (2012).
41. E. N. Billingslea *et al.*, Parvalbumin cell ablation of NMDA-R1 causes increased resting network excitability with associated social and self-care deficits. *Neuropsychopharmacology* **39**, 1603-1613 (2014).
- 15 42. P. J. Uhlhaas, W. Singer, Abnormal neural oscillations and synchrony in schizophrenia. *Nat Rev Neurosci* **11**, 100-113 (2010).
43. M. I. Atagun, Brain oscillations in bipolar disorder and lithium-induced changes. *Neuropsychiatr Dis Treat* **12**, 589-601 (2016).
- 20 44. S. Hellwig *et al.*, Altered microglia morphology and higher resilience to stress-induced depression-like behavior in CX3CR1-deficient mice. *Brain Behav Immun* **55**, 126-137 (2016).
45. S. A. Rowson *et al.*, Neuroinflammation and Behavior in HIV-1 Transgenic Rats Exposed to Chronic Adolescent Stress. *Front Psychiatry* **7**, 102 (2016).
- 25 46. M. P. Wautier *et al.*, Activation of NADPH oxidase by AGE links oxidant stress to altered gene expression via RAGE. *Am J Physiol Endocrinol Metab* **280**, E685-694 (2001).
47. M. Toyoshima *et al.*, Enhanced carbonyl stress induces irreversible multimerization of CRMP2 in schizophrenia pathogenesis. *Life Sci Alliance* **2**, (2019).
- 30 48. R. Suzuki *et al.*, Expression of the receptor for pituitary adenylate cyclase-activating polypeptide (PAC1-R) in reactive astrocytes. *Brain Res Mol Brain Res* **115**, 10-20 (2003).

- 5 49. R. Suzuki *et al.*, A transgenic mouse model for the detailed morphological study of astrocytes. *Neurosci Res* **47**, 451-454 (2003).
50. A. Das *et al.*, Hippocampal tissue of patients with refractory temporal lobe epilepsy is associated with astrocyte activation, inflammation, and altered expression of channels and receptors. *Neuroscience* **220**, 237-246 (2012).
- 10 51. D. D. Mao *et al.*, Effect of Qingxin Kaiqiao Fang on Hippocampus mRNA Expression of the Inflammation-Related Genes IL-1beta, GFAP, and Abeta in an Alzheimer's Disease Rat Model. *Evid Based Complement Alternat Med* **2018**, 9267653 (2018).
52. J. P. Luyendyk, J. G. Schoenecker, M. J. Flick, The multifaceted role of  
15 fibrinogen in tissue injury and inflammation. *Blood* **133**, 511-520 (2019).
53. N. Muller *et al.*, Celecoxib treatment in an early stage of schizophrenia: results of a randomized, double-blind, placebo-controlled trial of celecoxib augmentation of amisulpride treatment. *Schizophr Res* **121**, 118-124 (2010).
54. M. Nitta *et al.*, Adjunctive use of nonsteroidal anti-inflammatory drugs for  
20 schizophrenia: a meta-analytic investigation of randomized controlled trials. *Schizophr Bull* **39**, 1230-1241 (2013).
55. J. Savitz *et al.*, Minocycline and aspirin in the treatment of bipolar depression: a protocol for a proof-of-concept, randomised, double-blind, placebo-controlled, 2x2 clinical trial. *BMJ Open* **2**, e000643 (2012).
- 25 56. P. Stolk *et al.*, Is aspirin useful in patients on lithium? A pharmacoepidemiological study related to bipolar disorder. *Prostaglandins Leukot Essent Fatty Acids* **82**, 9-14 (2010).
57. A. Sakasai-Sakai, T. Takata, J. I. Takino, M. Takeuchi, Impact of intracellular glyceraldehyde-derived advanced glycation end-products on human  
30 hepatocyte cell death. *Sci Rep* **7**, 14282 (2017).
58. J. J. Hwang *et al.*, The human brain produces fructose from glucose. *JCI Insight* **2**, e90508 (2017).
59. J. J. Hwang *et al.*, Fructose levels are markedly elevated in cerebrospinal fluid compared to plasma in pregnant women. *PLoS One* **10**, e0128582 (2015).

- 5 60. Y. Shinozaki *et al.*, Transformation of Astrocytes to a Neuroprotective Phenotype by Microglia via P2Y1 Receptor Downregulation. *Cell Rep* **19**, 1151-1164 (2017).
61. P. Steullet *et al.*, Oxidative stress-driven parvalbumin interneuron impairment as a common mechanism in models of schizophrenia. *Mol Psychiatry* **22**, 936-943 (2017).
- 10 62. Y. Kawaguchi, Y. Kubota, GABAergic cell subtypes and their synaptic connections in rat frontal cortex. *Cereb Cortex* **7**, 476-486 (1997).
63. Y. Kawaguchi, H. Katsumaru, T. Kosaka, C. W. Heizmann, K. Hama, Fast spiking cells in rat hippocampus (CA1 region) contain the calcium-binding protein parvalbumin. *Brain Res* **416**, 369-374 (1987).
- 15 64. O. Kann, The interneuron energy hypothesis: Implications for brain disease. *Neurobiol Dis* **90**, 75-85 (2016).
65. E. Tomasella *et al.*, Deletion of dopamine D2 receptors from parvalbumin interneurons in mouse causes schizophrenia-like phenotypes. *Proc Natl Acad Sci U S A* **115**, 3476-3481 (2018).
- 20 66. G. Buzsaki, A. Draguhn, Neuronal oscillations in cortical networks. *Science* **304**, 1926-1929 (2004).
67. C. L. Beasley, G. P. Reynolds, Parvalbumin-immunoreactive neurons are reduced in the prefrontal cortex of schizophrenics. *Schizophr Res* **24**, 349-355 (1997).
- 25 68. T. Hashimoto *et al.*, Gene expression deficits in a subclass of GABA neurons in the prefrontal cortex of subjects with schizophrenia. *J Neurosci* **23**, 6315-6326 (2003).
69. M. Thompson, C. S. Weickert, E. Wyatt, M. J. Webster, Decreased glutamic acid decarboxylase(67) mRNA expression in multiple brain areas of patients with schizophrenia and mood disorders. *J Psychiatr Res* **43**, 970-977 (2009).
- 30 70. T. R. Insel, Rethinking schizophrenia. *Nature* **468**, 187-193 (2010).
71. A. Gugliucci, Formation of Fructose-Mediated Advanced Glycation End Products and Their Roles in Metabolic and Inflammatory Diseases. *Adv Nutr* **8**, 54-62 (2017).
- 35

- 5 72. J. Chaudhuri *et al.*, The Role of Advanced Glycation End Products in Aging and Metabolic Diseases: Bridging Association and Causality. *Cell Metab* **28**, 337-352 (2018).
73. C. Menard *et al.*, Social stress induces neurovascular pathology promoting depression. *Nat Neurosci* **20**, 1752-1760 (2017).
- 10 74. W. A. Banks *et al.*, Lipopolysaccharide-induced blood-brain barrier disruption: roles of cyclooxygenase, oxidative stress, neuroinflammation, and elements of the neurovascular unit. *J Neuroinflammation* **12**, 223 (2015).
75. D. Ben-Nathan, S. Lustig, H. D. Danenberg, Stress-induced neuroinvasiveness of a neurovirulent noninvasive Sindbis virus in cold or isolation subjected mice. *Life Sci* **48**, 1493-1500 (1991).
- 15 76. D. Koshiyama *et al.*, White matter microstructural alterations across four major psychiatric disorders: mega-analysis study in 2937 individuals. *Mol Psychiatry*, (2019).
77. S. M. Purcell *et al.*, Common polygenic variation contributes to risk of schizophrenia and bipolar disorder. *Nature* **460**, 748-752 (2009).
- 20 78. J. C. Ratliff *et al.*, The effect of dietary and physical activity pattern on metabolic profile in individuals with schizophrenia: a cross-sectional study. *Compr Psychiatry* **53**, 1028-1033 (2012).
79. J. L. Elmslie, J. I. Mann, J. T. Silverstone, S. M. Williams, S. E. Romans, Determinants of overweight and obesity in patients with bipolar disorder. *J Clin Psychiatry* **62**, 486-491; quiz 492-483 (2001).
- 25 80. A. V. Kalueff *et al.*, Neurobiology of rodent self-grooming and its value for translational neuroscience. *Nat Rev Neurosci* **17**, 45-59 (2016).
81. P. Jirkof, Burrowing and nest building behavior as indicators of well-being in mice. *J Neurosci Methods* **234**, 139-146 (2014).
- 30 82. C. S. Pedersen, D. B. Sorensen, A. I. Parachikova, N. Plath, PCP-induced deficits in murine nest building activity: employment of an ethological rodent behavior to mimic negative-like symptoms of schizophrenia. *Behav Brain Res* **273**, 63-72 (2014).

- 5 83. A. Forsingdal, K. Fejgin, V. Nielsen, T. Werge, J. Nielsen, 15q13.3 homozygous knockout mouse model display epilepsy-, autism- and schizophrenia-related phenotypes. *Transl Psychiatry* **6**, e860 (2016).
84. A. Ennaceur, J. Delacour, A new one-trial test for neurobiological studies of memory in rats. 1: Behavioral data. *Behav Brain Res* **31**, 47-59 (1988).
- 10 85. L. A. Tellez *et al.*, Separate circuitries encode the hedonic and nutritional values of sugar. *Nat Neurosci* **19**, 465-470 (2016).
86. W. T. Golde, P. Gollobin, L. L. Rodriguez, A rapid, simple, and humane method for submandibular bleeding of mice using a lancet. *Lab Anim (NY)* **34**, 39-43 (2005).

15

**Acknowledgments:** We would like to thank MS. Sayaka Ogikubo, MS, Yoshie Matsumoto, MS. Haimei

Zhang and MS. Minami Murata, Izumi Nohara, Yukiko Shimada, Emiko Hama, Nanako Obata, Mai

Hatakenaka, Chikako Ishida for their contribution to help us with experiments related to this research. We

also thank Dr. Tohru Kodama for teaching us about microdialysis and encephalogram recording, Dr. Jun

20 Horiuchi and Dr. Kenji Tanaka for review the study, Ms. Chiaki Watanabe and Ms. Hiromi Onuma for their

contribution to coordinating donations of postmortem brains, Prof. Hideki Chiba for the preparation of

postmortem brain samples. We also express our gratitude to the families of the deceased for the donations

of brain tissue and their time and effort devoted to the consent process and interviews.

- 5 **Funding:** This work was supported by Japan Society for the Promotion of Science KAKENHI Grant 18K14832 (to S.H.), 17K18395, 19K08033 (to H.M.), 17K16408 (to T.T.), 18H02537, 18K19383 (to H.O.) and also by the Ichiro Kanehara Foundation, the Japan Prize Foundation and the Takeda Science Foundation (to S.H.), Strategic Research Program for Brain Sciences from AMED Grant JP19dm0107107 (to H.Y.), and Grant-in-Aid for Scientific Research on Innovative Areas from the MEXT JP16H06277 (to
- 10 H.Y.). This research was also supported by KAKENHI Grant Numbers: 16H05380 (to M.A.) , 18K06977 (to K.T.) 19H03589 (to M.I.) , 18K15354 (to K.S.) , AMED Grant Number: JP19dm0107088 (to M.I.) , The Kanae Foundation for the Promotion of Medical Science (to K.T.) and The Uehara Memorial Foundation (to M.A.) .
- 15 **Author contributions:** S.H. and H.O. designed the study. S.H. performed and analyzed all experiments. H.M. helped with experimental design of EEG recording and analysis of the results, and edited the manuscript. T.T. coordinated the EEG recording. Y.K., M.H., R.I., A.N., and H.Y. helped with the design of experiments using human specimens and provided fixed human brain sections. T.N. and S.S. provided GFAP-GFP mice. T.D. and T.M. generated and provided *Glo1*
- 20 knockout (KO) mouse. K.T. and K.S. backcrossed *Glo1* KO mice to B6J mice for all experiments.

5 Y.N. performed cDNA microarray analysis of gene expression. M.I., M.A., K.T., K.S. and M.M. helped this study with important suggestions. S.H. generated all figures, tables, and wrote the manuscript. H.O. edited the manuscript and supervised this study.

**Competing interests:** Authors declare no competing interests.

10 **Data and materials availability:** All materials used in this paper are available if you request. See Material and Method section if you need the accession number for transcriptome analysis data.

**Supplementary Materials:**

## **Materials and Methods**

### 15 **Animals**

All experimental procedures were approved by the Animal Experimentation Ethics Committee of the Tokyo Metropolitan Institute of Medical Science (49040). All mice were maintained under a 12:12 h light:dark cycle (lights on at 8:00 AM) with free access to the indicated diet. All efforts were made to minimize the number of animals used and their suffering. The generation of *Glo1* knockout mice will be described in a future publication. In brief, *Glo1*-trapped ES cell lines from

20



5 the International Gene Trap Consortium were used for the generation of three founder mice, which  
were then backcrossed to C57BL/6 mice. Alternatively, mice were backcrossed to GFAP-GFP  
mice to monitor the activation of astrocytes<sup>50,51</sup>. Male mice were used exclusively in the behavioral  
tests, whereas mice of both sexes were used in histological, biochemical, and physiological  
experiments.

10

### **Diet preparation**

The two diets used in this study were newly created in collaboration with Oriental Yeast Co., Ltd.  
(Tokyo, Japan). We named the sucrose diet HSD-70 (# OYC 2405100) and the starch diet HCD-70  
(# OYC 2405000) (Supplementary Table 4). They contain the same caloric proportions of  
15 carbohydrate, fat, and protein, but all carbohydrate calories are derived from either starch or  
sucrose.

### **Drug preparation**

Aripiprazole was dissolved in acetic acid and diluted to 3.5 mg/L in water for administration at 0.5  
20 mg/kg/day. The final acetic acid concentration in the drinking water was 0.7%. Aspirin was

5 dissolved in ethanol and diluted to 70 mg/L in water for administration at 1 mg/kg/day. The final ethanol concentration in the drinking water was 0.15%. The daily dose was based on an assumed average water consumption of 5 mL per day.

### **Behavioral tests**

10 Mice were habituated in the behavioral room for over 30 min before each test. Behavioral tests were performed in the following sequence of increasing stress: elevated plus maze, grooming, nest building, open field, object location, social interaction, and PPI. All test apparatuses were cleaned with 70% ethanol and water between trials, and the subsequent test session was started only after the ethanol vapor odors had disappeared and the apparatuses had dried.

15 The elevated plus maze (EPM-04M, Muromachi, Japan) consisted of two opposing open arms (297 × 54 mm) and two closed arms (300 × 60 × 150 mm) extending from a central platform (60 × 60 mm). The entire apparatus was elevated 400 mm above the floor. Each mouse was placed on the central platform facing a closed arm and allowed to explore the maze freely for 10 min. Arm entry was defined as the entry of all four paws into the arm. The time spent in the open arms over  
20 10 min was recorded as an index of state anxiety.

5 For the self-grooming test, all mice housed in the same home cage were moved into a new  
cage for 10 min. Each mouse was then placed individually in a standard mouse home cage  
(31 × 16.5 × 14 cm) illuminated at ~200 lux. After a 10 min habituation period, each mouse was  
scored for cumulative time spent grooming all body regions(80) over 10 min using a stopwatch.  
Self-grooming behavior is conserved across species and is indicative of certain pathological  
10 conditions or factors. In humans, for example, self-grooming increases during stressful conditions  
and in certain psychiatric disorders(80).

For the nest building test, 200 g of corncob was spread across the bottom of each cage for  
bedding, and a square-shaped piece of cotton was placed in the cage center as raw material for the  
nest. Each subject was placed individually in the cage for 8 h. Photos of the constructed nest were  
15 acquired every 2 h, and the nest building process was evaluated by measuring the proportion of  
loose cotton as follows: one point for 25% weight (Wt%) loosened, two points for 50 Wt%  
loosened, three points for 75 Wt% loosened, and four points for 100 Wt% loosened. After 8 h, we  
checked the shape of the nest and added one point if the mice had completed a nest with a bird's  
nest-like shape. The temperature of the room was maintained at 25°C and illumination at 150–180

5 lux during nest building. Nest building behavior is an indicator of general well-being in mice(81),  
whereas poor nest building is an indicator of psychological or physiological abnormalities(82, 83).

For the open field (OF) test, each mouse was placed in the center of the apparatus ( $40 \times 40 \times 40$   
cm; 150–180 lux illumination) and allowed to move freely for 10 min. The behavior of each mouse  
was monitored using a Charge Coupled Device (CCD) camera mounted on the ceiling above the  
10 OF. The total distance traveled (cm) was measured using CompACT VAS software (Muromachi).

For the object location test (OLT) of working memory(84), mice first explored the empty OF  
box, and then, two identical objects A and B (two 500 mL PET bottles filled with blue-colored  
water) were placed in two corners 5 cm from the wall. After a 10 min exploration/learning period,  
15 the mice were returned to their home cage for 5 min, and Object A was moved to a new corner  
(Object A'). The animals were then placed back in the OF box and allowed to explore for 5 min.

The time spent exploring A' and B were measured to calculate a discrimination index representing  
working memory according to the following equation: Discrimination Index = (Novel Object A'  
exploration time – Familiar Object B exploration time) / (Novel Object A' + Familiar Object B  
20 exploration times). The OLT was performed under illumination at 10–15 lux.

5           The social interaction test was conducted as described<sup>87</sup> using a specialized Sociability Apparatus (SC-03M, Muromachi). The time spent sniffing a novel stimulus mouse or object was manually scored from videos recorded using an overhead color USB camera (aa000080a02, Iroiro House). Stimulus mice (129Sv/SvJcl strain) matched to test mice for age and sex were habituated to the apparatus and to the enclosure cup for 30 min per day for 2 days prior to testing. The location  
10 (left or right) of the novel object and novel mouse within an enclosure were alternated across test subjects. The test mouse was allowed to acclimate to the apparatus for a total of 20 min before the sociability test, the first 10 min in the central chamber with the doors closed and then for 10 min in the empty arena with the doors open. The test subject was then briefly confined to the center chamber while a novel stimulus mouse in an enclosure cup was placed on one of the side chamber,  
15 with another empty enclosure cup (novel object) was placed on the other side of the chamber. The test subject was allowed to approach the novel object or mouse freely for 10 min. The time spent interacting with the stimulus mouse versus the novel object was calculated as an index of sociability.

          The SR-LAB-Startle Response System (San Diego Instruments) was used to detect acoustic  
20 startle reflexes and pre-pulse inhibition (PPI). Startle responses were measured using five stimulus

5 intensities (80, 90, 100, 110, and 120 dB) delivered 10 times each for 40 ms over a white noise background (65 dB). The stimuli were presented in quasi-random order at random inter-trial intervals (10–20 s). In the PPI session, mice were exposed to two stimulus patterns: 1) a startle stimulus alone (120 dB, 40 ms) with no pre-pulse stimulus and 2) a startle stimulus (120 dB, 40 ms) following a pre-pulse stimulus (70 dB for 20 ms; lead time, 100 ms). Each trial was  
10 repeated 10 times in quasi-random order at random inter-trial intervals (10–20 s). PPI was defined as the percent decline in startle response because of pre-pulse stimuli according to the following equation:  $100 - [(120 \text{ dB startle amplitude after any pre-pulse}) / (120 \text{ dB startle amplitude only})] \times 100$ .

## 15 **Immunohistochemistry**

After transcardial perfusion with PBS and 4% paraformaldehyde, whole brains were collected, post-fixed at 4°C overnight, and then cryoprotected in 20% sucrose at 4°C overnight. Serial coronal sections (50 µm) were then cut using a cryostat (CM3050 S; Leica Microsystems). The antigens in the tissues were reactivated by heating in HistoVT One solution (Nakalai Tesque) for  
20 30 min at 70°C using a water bath. Sections were permeabilized with 0.2% Triton X-100 and 1%

5 Block Ace (DS Pharma Biomedical) in PBS for 30 min at room temperature and then incubated  
overnight with the indicated primary antibodies at room temperature. For immunohistochemistry  
of postmortem human brain tissues, paraffin blocks including BA9 (a region of frontal cortex)  
were sliced into 10  $\mu\text{m}$  sections, deparaffinized with xylene, and rehydrated with decreasing  
concentrations of ethanol in water. Antigens were reactivated by heating in HistoVT One solution  
10 for 30 min at 90°C using a water bath. Sections were treated with TrueBlack Lipofuscin  
Autofluorescence Quencher (Biotium Inc.) for 30 s at room temperature and blocked with 1%  
Block Ace (DS Pharma Biomedical) in PBS for 30 min at room temperature. Thereafter, mouse  
and human brain sections were subjected to the same immunostaining procedures. The following  
primary antibodies were diluted in PBS containing 0.4% Block Ace: goat anti-PV (Frontier  
15 Institute, PV-Go-Af860; 1:2000), mouse anti-ALDH1L1 (Abnova, H00010840-M01; 1:200),  
FITC-conjugated tomato lectin (VECTOR, FL-1171; 1:200), chick anti-GFP (Abcam, ab13970;  
1:500), goat anti-IBA1 (Abcam, ab48004; 1:100), mouse anti-NeuN (Millipore, MAB377; 1:500),  
rabbit anti-AGE (Abcam, ab23722; 1:2000), rabbit anti-IBA1 (Wako, WDJ3047; 1:300), and  
rabbit anti-fibrin (Dako, A0080, 1:500). Sections were then washed three times with PBS-0.05%  
20 Tween-20, incubated for 2 h with fluorochrome-conjugated secondary antibodies in PBS

5 containing 0.4% Block Ace, and washed an additional three times in PBS containing 0.4% Block  
Ace. For enhanced horseradish peroxidase (HRP) immunostaining, samples were treated with 3%  
H<sub>2</sub>O<sub>2</sub> in PBS for 20 min after the reactivation step to quench endogenous peroxidase activity and  
then washed in PBS. Sections were incubated with rabbit anti-GLO1 (Novusbio, NBP2-75514,  
1:1500) and/or mouse anti-AGE4 (Trans Genic Inc, 14B5, 1:400), followed by incubation with  
10 anti-IgG antibodies conjugated to biotin (Vector, 1:200). After washing as described for other  
secondary antibodies, sections were incubated with streptavidin-conjugated HRP (Jackson  
ImmunoResearch, 1:200) for 120 min and washed three times with PBS-0.05% Tween-20. The  
TSA Plus Fluorescence System (PerkinElmer) was used to detect HRP activity. All preparations  
were counterstained with DAPI (Nacalai Tesque) to reveal cell nuclei, washed three additional  
15 times, mounted in Permaflow (Thermo Scientific), and observed using a FluoView® FV3000  
Confocal Laser Scanning Microscope (Olympus). Counting of GFP-, AGE-, AGE4-, and  
fibrin-positive cells and measurements of immunopositive areas were performed in a fixed area  
using ImageJ version 2.0.0-rc-59/1.51n.

## 20 **Immunoblotting**



5 Extracts from mouse hippocampi were homogenized in lysis buffer containing 40 mM Tris base, 0.4% sodium dodecyl sulfate (SDS), 0.01 M EDTA (pH 8.0), 8 M urea, and 1 mM phenylmethylsulfonyl fluoride. The total lysate protein content was quantified using a DC Protein Assay Kit (Bio-Rad). Total protein (30  $\mu$ g per gel lane) was separated by SDS-PAGE and transferred to PVDF membranes (Millipore). Membranes were blocked with TBST buffer (1.37 M NaCl, 2.7 mM KCl, and 0.25 M Tris, pH 8.0) including 0.2% Triton X-100 and 5% bovine serum albumin (BSA) for 30 min at room temperature with slow shaking, followed by incubation overnight with primary antibodies in TBST including 2% BSA at 4°C. The primary antibodies used were rabbit anti-GLO1 (Santa Cruz, sc-67351; 1:1000), mouse-anti-PV (Swant, PV-235; 1:1000), and mouse-anti-tubulin (Santa Cruz, sc-32293; 1:10000). After washing three times with TBST, membranes were incubated with the secondary antibody (HRP-conjugated anti-mouse or anti-rabbit IgG antibody, GE Healthcare; 1:2000) in TBST plus 2% BSA. After washing three times with TBST, blots were processed for chemiluminescence using standard protocols (ECL Prime Western Blotting Detection Reagent #RPN2236, GE Healthcare), and signals were detected with an LAS 4000 Imager (Fuji Film).

## 5 Microdialysis

We used an in vivo microdialysis system for measurement of extracellular dopamine concentration(85) and for collection of brain parenchymal dialysate. After anesthesia by intraperitoneal injection of ketamine (80 mg/kg)/xylazine (16 mg/kg), mice were fixed in a stereotaxic apparatus (Narishige) and a microdialysis guide cannula (CXG-8, Eicom) was

10 implanted in the medial prefrontal cortex (mPFC) (antero-posterior (AP), +1.8 mm; medio-lateral (ML),  $\pm 0.15$  mm; dorso-ventral (DV),  $-1.5$  mm from bregma), or nucleus accumbens (NAc) (AP, +1.5 mm; ML,  $\pm 0.6$  mm; DV,  $-3.5$  mm from bregma). After recovery for at least 10 days, a microdialysis probe (CX-I-8-01 for the mPFC and CX-I-8-02 for NAc; Eicom) was inserted through the guide cannula. After insertion, the probe was connected to a syringe pump and

15 perfusion was performed at 2  $\mu\text{L}/\text{min}$  for NAc and 0.5  $\mu\text{L}/\text{min}$  for mPFC using Ringer's solution (147 mM NaCl, 4 mM KCl, and 2.3 mM  $\text{CaCl}_2$ ). Dialysate samples were collected every 10 min and automatically loaded onto an HTEC-500EPS HPLC unit (Eicom). Constant 5-HT concentration in three consecutive collection periods was first confirmed to rule out blood contamination before starting the dopamine concentration measurements or collection of

20 parenchymal dialysates. Analytes were then separated on an affinity column (PP-ODS III, Eicom),

5 and compounds were subjected to redox reactions within an electrochemical detection unit  
  
(amperometric DC mode; applied potential range, 450 mV). The resulting chromatograms were  
  
analyzed using an EPC-500 data processor (Eicom), and actual sample concentrations were  
  
computed based on the peak heights obtained using 0.01, 0.1, and 1 pg dopamine in standard  
  
solution (Sigma). The locations of the microdialysis probes were then confirmed histologically.

10

### **EEG recordings**

For behavioral and video/EEG monitoring, mice were anesthetized by intraperitoneal injection of  
  
ketamine (80 mg/kg)/xylazine (16 mg/kg), fixed in a stereotaxic apparatus (Narishige, Japan), and  
  
implanted with EEG and electromyography (EMG) electrodes. The EEG electrodes were  
  
15 gold-coated stainless steel screws (SUS303) soldered with lead wires (ANE-0190, Adler's Nest,  
  
Japan) implanted epidurally over the left frontal cortex (AP, 1 mm; ML, 1 mm) and the bilateral  
  
parietal cortex (AP, -2 mm; ML,  $\pm 2$  mm). All wires were soldered to a multichannel electrical  
  
connector (R833-83-006-001, TOKIWA SHOKO, Japan). The left parietal cortex electrode was  
  
used as a reference for monitoring the frontal cortex EEG. The EMG electrodes were lead wires  
  
20 placed bilaterally into the trapezius muscle. After recovery for at least 10 days, EEG/EMG signals

5 were amplified and band-pass filtered (EEG: 1.5–1000 Hz; EGM: 15–3000 Hz) using a  
MEG-6116 system (NIHON KOHDEN), digitized at a sampling rate of 200 Hz, recorded using a  
data acquisition system (PowerLab 8/30, ADInstruments), and analyzed using LabChart Software  
(ADInstruments). Behavioral activities were recorded using a USB camera (aa000080a02, Iroiro  
House, Japan). Behavioral and electrophysiological responses to a novel object (an empty 100 ml  
10 DURAN bin) were recorded in an OF chamber ( $20 \times 20 \times 26$  cm). The novel object was placed in  
one corner of the OF chamber to induce exploration. The 30 s preceding first contact with the  
novel object was analyzed for object recognition (“object activity”). For EEG monitoring in the  
home cage, mice were first habituated for 8 h. Home cage EEG data were then acquired for 2 min  
after awaking as confirmed by clear EMG signals and movement images from an offline video  
15 camera analysis (“home cage activity”). All recordings were converted into power spectra using a  
fast Fourier transform (FFT) algorithm with a 5 s Hann cosine-bell window and 50% overlap  
between successive window measurements. All FFTs were at 1024 points to obtain 0.512 Hz  
resolution. The total signal amplitude or power ( $V^2$ ) in each 5 s period was measured as the power  
magnitude at each frequency. The grouped power spectra were averaged over the following  
20 frequency ranges: 1–4 Hz (delta), 5–10 Hz (theta), 30–45 Hz (low gamma), and 55–80 Hz (high

5 gamma). The power values detected at each frequency range for 30 s were further averaged over  
30 s of total EEG power using the average values to remove potential noise. These analyses were  
performed using custom software written in MATLAB (R2019b; MathWorks).

### **Transcriptome analysis**

10 Three independent total RNA samples from each group were mixed and purified using an RNeasy  
Mini Kit (Qiagen). RNA quality was assessed using a 2100 bioanalyzer (Agilent Technologies).  
Cy3-labeled cRNA was prepared using a Low Input Quick Amp Labeling Kit in accordance with  
the manufacturer's protocol (Agilent Technologies). Samples were hybridized to the SurePrint G3  
Mouse Gene Expression v2 Microarray (G4852B; Agilent Technologies). The array was then  
15 washed and scanned using the SureScan Microarray Scanner (Agilent Technologies). Microarray  
images were analyzed using the Feature Extraction software with default settings for all  
parameters (Agilent Technologies). Data from each microarray analysis were normalized by shift  
to the 75<sup>th</sup> percentile without baseline transformation. Microarray results were deposited in the  
Gene Expression Omnibus database under accession number GSE141829.

## 5 **Insulin and glucose measurements**

Blood plasma was collected from the mouse cheek as described by Golde(86). Plasma glucose concentration was measured using a Precision-Neo blood glucose meter (#71386-80, Abbott Japan), plasma insulin concentration using an ELISA kit (#M1102, MORINAGA), and glucose concentration in the dialysate samples using a different ELISA kit (#ab65333, Abcam) all according to the manufacturers' guidelines. Data were collected on a microplate reader (Varioskan, Thermo Fisher Scientific).

## **Human postmortem brain tissue collection**

Postmortem brain tissues from SZ and BD patients were obtained from the Fukushima Brain Bank at the Department of Neuropsychiatry, Fukushima Medical University. Postmortem brain tissues from control subjects were obtained from the Section of Pathology, Fukushima Medical University Hospital. The use of postmortem human brain tissues in this study was approved by the Ethics Committee of Fukushima Medical University (No.1685) and Tokyo Metropolitan Institute of Medical Science (No. 18-20) and complied with the Declaration of Helsinki and its later amendments. All procedures were conducted with the informed written consent of the next of kin.

5 Detailed demographic information of the 10 subjects with SZ, 9 subjects with BD, and the 12 age-  
and sex-matched control subjects is provided in **Supplementary Table 3**. There were no  
between-group differences in sex (Fisher's exact test, Ctrl and SZ:  $p = 1.00$ , Ctrl and BD:  $p = 0.40$ ),  
age (Student's  $t$ -test, Ctrl and SZ:  $p = 0.69$ , Welch's  $t$ -test, Ctrl and BD:  $p = 0.66$ ), postmortem  
interval (PMI) (Student's  $t$ -test, Ctrl and SZ:  $p = 0.89$ , Ctrl and BD:  $p = 0.98$ ) and history of  
10 diabetes mellitus (Fisher's exact test, Ctrl and SZ:  $p = 0.59$ , Ctrl and BD:  $p = 0.59$ ). Each SZ and  
BD patient fulfilled the diagnostic criteria established by the American Psychiatric Association  
(Diagnostic and Statistical Manual of Mental Disorders, DSM-IV) and did not have a past history  
of other neurological disorders or substance abuse. Moreover, none of the control subjects had any  
record of mental disorders, neurological disorders, or substance abuse.

15

### **Statistical analyses**

Data were analyzed using the Tukey–Kramer test or two-way repeated-measures ANOVA with  
post hoc Shaffer's multiple comparisons tests. GLO1 immunoblotting results were compared by  
Dunnett's test and postmortem brain staining results by Welch's  $t$ -test. Behavioral results from  
20 starch  $+/+$  and Suc *Glo1*/ $+$  groups were reused according to the 3R rule. The number of animals

5 used can be found in the legend of each figure. Significance was set at  $P < 0.05$  (two-tailed) for all tests.

### Supplementary Figure Legends

Supplementary Figure 1 Characterization of regional GLO1 expression in WT and heterozygous

10 *Glo1* mutant mice fed starch or sucrose.

(a) Western blot analysis of GLO1 protein expression using tubulin as an internal control. The cerebral cortex, including the hippocampus, was used as the loading sample. (b) Densitometric analysis of GLO1 protein expression (Starch +/+, n = 3; Starch *Glo1*/+, n = 4; Suc +/+, n = 3; Suc *Glo1*/+, n = 4). To quantify expression, the intensities of GLO1 bands shown in a were divided by

15 the intensities of corresponding tubulin bands. (c) Body weight trajectories. No significant differences were observed among groups (n = 9–10 mice per group). Dunnett's test was used in b and two-way repeated-measures ANOVA in c. Main effect of group (F3, 33 = 1.7512,  $P = 0.1757$ ). The data are presented as the mean  $\pm$  s.e.m. \* $P < 0.05$ .

20 Supplementary Figure 2 Effect of aripiprazole treatment on behavioral phenotypes.



5 (a) Elevated plus maze test to evaluate anxiety. (b) Interaction time with an empty cylinder (novel  
object) or a stimulus mouse placed in the cylinder during the social interaction test. No differences  
were detected in social interaction among the four groups. (c–f) Effects of aripiprazole treatment  
on the acoustic startle response (c), self-grooming (d), elevated plus maze performance (e), and  
nest building skill (f). The abnormal behaviors of  $G \times E$  mice in these tests were not improved by  
10 aripiprazole treatment. The Tukey–Kramer test was used in a, b, d, and e, whereas two-way  
repeated-measures ANOVA was used in c and f. Main effects of group are as follows: c ( $F_{2,35} = 8.557$ ,  $P = 0.0009$ ) and f ( $F_{2,47} = 14.6637$ ,  $P = 0.004$ ). The data are presented as the  
mean  $\pm$  s.e.m.  $*P < 0.05$ ;  $**P < 0.01$ ;  $***P < 0.001$ .

15 Supplementary Figure 3 Cellular localization of GLO1 in the cerebral cortex of sucrose-fed  
wild-type mice.

(a–f) Localization of GLO1 in astrocytes. (a) Immunohistological images of GLO1  
co-immunostaining with an astrocyte marker (ALDH1L1) or with an endothelial cell marker  
(tomato lectin). (b) Merged image of GLO1 and ALDH1L1 immunoreactivity in a. The yellow  
20 arrows in b indicate cells with colocalization of GLO1 and ALDH1L1. (c) Merged image of GLO1

5 and lectin from a. The white arrows point to representative GLO1-positive cells located close to the endothelial cells. (d, e) Higher-magnification images of GLO1 co-immunostaining with ALDH1L1 or with tomato lectin from a different focal plane. (e) Merged image of GLO1 and ALDH1L1 from d. (f) Plots of pixel intensities along the yellow arrow in e. The black arrows indicate the areas of GLO1 and ALDH1L1 colocalization. (h) Merged image of GLO1 and tomato  
10 lectin from g. (i) Plots of pixel intensities along the white arrow in h. Unlike that observed in f, the GLO1 expression pattern was similar to that of tomato lectin expression, whereas ALDH1L1 exhibited a distinct expression pattern. (j) Co-immunostaining of GLO1 with the neuronal marker NeuN and the microglial marker IBA1. (k) Merged image of GLO1 and NeuN immunoreactivity from j. The yellow arrows indicate neurons with mild GLO1 immunoreactivity. (l) Merged image  
15 of GLO1 and IBA1 from j. The white arrows indicate microglia with weak GLO1 immunoreactivity. (m) GLO1 immunostaining together with DAPI staining in *Glo1* homozygous mice.

Supplementary Figure 4 Fructose-derived AGE accumulation in microglia of sucrose-fed mice.

5 (a, b) Immunohistochemical images of the microglial marker IBA1 and AGE4 in the CA1 region.  
(c) Merged image of AGE4 and IBA1 immunoreactivity. (d) Higher-magnification images of  
AGE4 co-immunostaining with IBA1. (e) Number of protrusions in each IBA1-positive cell from  
a. Mean number of protrusions in five randomly selected cells per image from three independent  
mice. (f) Measurement of the area covered by AGE immunoreactivity in a (defined as the area of  
10 pixels above threshold, in which the area is above the appropriate threshold of pixel intensity in  
each image. The mean intensity of the entire image was measured for each section (one slice from  
four or five mice). Tukey–Kramer tests were used in e and f. \* $P < 0.05$ ; \*\* $P < 0.01$ ; \*\*\* $P < 0.001$ .

Supplementary Figure 5 Protective effects of aspirin against the development of abnormal  
15 behaviors in  $G \times E$  mice.  
(a–c) Effects of aspirin treatment on the acoustic startle response (a), self-grooming (b), and  
elevated plus maze performance (c). Aspirin prevented deficits in grooming duration and partially  
ameliorated the decline in acoustic startle response. It also increased the time spent in the open  
arms of the elevated plus maze, suggesting reduced anxiety. Two-way repeated-measures

5 ANOVA was used in a ( $F_{2, 42} = 8.0903, P = 0.0011$ ) and the Tukey–Kramer test in b and c. The data are presented as the mean  $\pm$  s.e.m.  $*P < 0.05$ ;  $***P < 0.001$ .

**Fig. 1** Generation of  $G \times E$  model mice and analyses of psychiatric disease-related phenotypes.

(a) Timeline of the experiments. After weaning (P21), wild-type (WT) and *Glo1* heterozygous mutant mice were fed either a starch diet (control) or a sucrose diet (experimental). Diets were equal in total calories and proportions of calories from carbohydrates, lipids, and proteins. The behavioral test battery was administered starting at 2 months of age (upper panel). Middle panel: Macronutrient composition of the two diets. We used *Glo1* heterozygous mice to mimic patients with psychiatric disorders who exhibit decreased GLO1 activity or expression, whereas the high-sucrose intake was used as the environmental risk factor (bottom panel). We investigated four groups of mice: WT, starch-fed mice (Starch +/+); *Glo1* heterozygous, starch-fed mice (Starch *Glo1*/+); WT, sucrose-fed mice (Suc +/+); and *Glo1* heterozygous, sucrose-fed mice (Suc *Glo1*/+). (b–g) Behavioral analyses of the four groups of mice (n = 18–23 mice per group). (b) Spontaneous locomotor activity in the open-field test. (c) Acoustic startle responses. (d) Pre-pulse inhibition (PPI) using a 70 dB pre-pulse. (e) Object location test to evaluate working memory. (f)

10

15

20

5 Duration of self-grooming in the home cage. (g) Quantification of nest building skills over 8 h. (h)

Extracellular concentration of dopamine in the nucleus accumbens (NAc) measured at 20 min

intervals using an *in vivo* microdialysis system. Methamphetamine (1.25 mg/kg) was administered

by intraperitoneal (i.p.) injection at time 0 (arrow) (n = 8–11 mice per group). (i–k) Effects of

aripiprazole (Arip) treatment on abnormal behaviors (n = 16–18 mice per group). (i)

10 Quantifications of locomotor activity. (j) PPI for the 70 dB pre-pulse. (k) Object location test.

Tukey–Kramer test was used in d, e, f, j, and k, whereas two-way repeated-measures ANOVA was

used in b, c, g, h, and i. Main effects of group were as follows: b (F3, 73 = 6.19,  $P = 0.0008$ ), c (F3,

63 = 6.75,  $P = 0.0005$ ), g (F3, 81 = 6.67,  $P = 0.0004$ ), h (F4, 36 = 14.0374), and i (F2, 51 = 27.59,

$P < 0.0001$ ). These ANOVA tests were followed by Shaffer's multiple comparisons tests for

15 genotype groups. (h) Bonferroni multiple comparisons test of genotype groups at specific time

points, ### $P < 0.001$  for Suc *Glo1*/+ vs. Ctrl (Starch +/+), \$\$ $P < 0.01$  for Starch *Glo1*/+ vs. Ctrl

(Starch +/+). Data are presented as mean  $\pm$  s.e.m. \* $P < 0.05$ , \*\* $P < 0.01$ , \*\*\* $P < 0.001$ ; n.s., not

significant.

5 **Fig. 2** Parvalbumin-positive interneuron dysfunction in  $G \times E$  mice.

(a) Immunohistochemistry of parvalbumin (PV) in the hippocampal dentate gyrus (DG). (b)

Number of PV-positive cells in the DG (average of one slice from three mice per group). (c)

Western blot analysis of PV protein expression using tubulin as the internal control. (d)

Densitometric analysis of PV protein expression. To quantify expression, PV band intensities were

10 divided by corresponding tubulin band intensities ( $n = 3$  mice per group). (e) Average gamma

band power in the home cage and during novel object recognition in the open field ( $n = 7-8$  mice

per group). (f) Changes in gamma band power from the home cage to the novel object phase in

individual mice ( $n = 7-8$  mice per group). Tukey–Kramer tests were used in b, d, and e, whereas

two-way repeated-measures ANOVA were used in f. The main effects of group were as follows: b

15 (F3, 73 = 6.19,  $P = 0.0008$ ), c (F3, 63 = 6.75,  $P = 0.0005$ ), g (F3, 81 = 6.67,  $P = 0.0004$ ), h (F4,

36 = 14.0374), and i (F2, 51 = 27.59,  $P < 0.0001$ ). ANOVA tests were followed by Shaffer's

multiple comparison tests for genotype groups. Data are presented as mean  $\pm$  s.e.m. \* $P < 0.05$ ,

\*\* $P < 0.01$ , \*\*\* $P < 0.001$ ; n.s., not significant.

5 **Fig. 3** AGE accumulation in the neurovascular endothelium and pre-inflammatory status of

astrocytes in  $G \times E$  mice.

(a) Images of AGE immunohistochemistry in the medial prefrontal cortex. (b) Measurement of the

area covered by AGE immunoreactivity (total area of pixels above the threshold) (average of one

slice from three mice per group). The mean intensity of the entire image was measured in each

10 section. (c–e) Immunohistochemical images showing colocalization of the endothelial cell marker

tomato lectin or the astrocyte marker Aldh111 and AGEs. (f, g) Plots of pixel intensities along the

white arrow in d and e, respectively. The black arrows in f indicate colocalization points of lectin

and AGEs. (h) Immunohistological images of GFP-positive astrocytes in the hippocampal CA1

region. (i) Number of GFP-positive cells in each image presented in h. No significant differences

15 were observed among the groups. (k) Mean fluorescent intensities of 10 randomly selected cells

per image from the hippocampal CA1 region (from four independent mice). Tukey–Kramer tests

were used in b, i, and j.  $**P < 0.01$ ;  $***P < 0.001$ .

20 **Fig. 4** Angiopathy and impaired glucose transport in  $G \times E$  mice.

- 5 (a, b) Venn graph showing the overlap in prefrontal cortex genes exhibiting a >2-fold (a) or <0.5-fold (b) expression change compared with the CTL group (n = 3 mice per group). (c) Immunohistochemical images of fibrin and the endothelial cell marker tomato lectin. (d) Measurement of the area covered by fibrin immunoexpression in c (defined as the area of pixels above threshold of pixel intensity in each image) (average of one slice from three mice per group).
- 10 The mean intensity of the entire image was measured for each section. (e) Immunohistochemical images of fibrin and tomato lectin in medial prefrontal cortex. (f) Plots of pixel intensities along the yellow arrow in e. (g) Extracellular concentrations of glucose in the dialysis buffer at each time point (1 h collection after 16 h of fasting, 0–1 h after eating 0.05 g of carbohydrate (starch or sucrose), and 1–2 h after eating 0.05 g of carbohydrate (starch or sucrose) (n = 5–6 mice per
- 15 group)). (h) Plasma glucose levels in wild-type (WT) and *Glo1* heterozygous mice (n = 6–7 mice per group). The first measurement was performed after 16 h of fasting, and the second blood collection was performed 30 min after eating 0.05 g of carbohydrate. No significant differences were observed among groups. (i) Fasting plasma insulin levels in WT and *Glo1* heterozygous mice. No significant differences were observed between groups (n = 5–6 mice per group).
- 20 Two-way repeated-measures ANOVA was used in g and h. Main effects of group were as follows:



5 g (F3, 23 = 5.7851,  $P = 0.0042$ ) and h (F3, 23 = 2.9734,  $P = 0.0528$ ). Tukey–Kramer tests were used in d and i. The data are presented as the mean  $\pm$  s.e.m.  $**P < 0.01$ ;  $*P < 0.05$ .

**Fig. 5** Protective effects of low-dose aspirin in  $G \times E$  mice.

(a–d) Results of behavioral tests performed to evaluate the effects of aspirin treatment (n = 12–21  
10 mice per group). (a) Quantifications of spontaneous locomotor activity in the open field. (b) Pre-pulse inhibition at 70 dB. (c) Object location test of working memory. (d) Quantification of nest building skills over 8 h (n = 12–21 mice per group). (e) Immunohistochemical images of fibrin and the endothelial cell marker tomato lectin. (f) Measurement of the area covered by fibrin immunoexpression in e (defined as the area of pixels above the threshold of pixel intensity in each  
15 image) (average of one slice from three mice per group). The mean intensity of the entire image was measured for each section. (g) Extracellular concentrations of glucose in the dialysis buffer at each time point (1 h collection after 16 h of fasting, 0–1 h after eating 0.05 g of carbohydrate, and 1–2 h after eating 0.05 g of carbohydrate) (n = 4–6 mice per group). Tukey–Kramer tests were used in b, c, and f, two-way repeated-measures ANOVA in a and d. The main effects of group were  
20 as follows: a (F2, 50 = 6.4385,  $P = 0.0033$ ), d (F2, 49 = 8.0315,  $P = 0.001$ ), and g (F2,

5 17 = 6.1758,  $P = 0.0096$ ). The data are presented as the mean  $\pm$  s.e.m. \* $P < 0.05$ ; \*\* $P < 0.01$ ;

\*\*\* $P < 0.01$ .

**Fig. 6** Angiopathy in postmortem brains from individuals with psychiatric disorders.

(a) Representative immunohistochemical images of fibrin in the BA9 region of postmortem brains  
10 from controls and patients with schizophrenia (SZ) or bipolar disorder (BD). (b) Measurement of  
the area covered by fibrin immunoexpression in a (defined as area of pixels above threshold of  
pixel intensity in each image. The mean intensity of the entire image was measured for each  
section. The Tukey–Kramer test was used in b. Data are presented as the mean  $\pm$  s.e.m. (c)  
Representative immunohistochemical images of fibrin (magenta) and the endothelial cell marker  
15 tomato lectin (green) in postmortem brains from a SZ patient. Fibrin-positive areas are merged  
with areas of vascular endothelial cell marker expression. (d) Diagrams describing the hypothesis  
proposed to explain functional and behavioral abnormalities in CTL mice (left) and G  $\times$  E mice  
(right) (see Discussion for details).

### Experimental Schedule

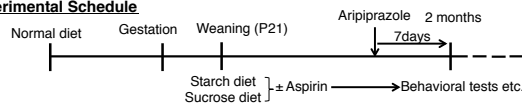

### Two kinds of diet

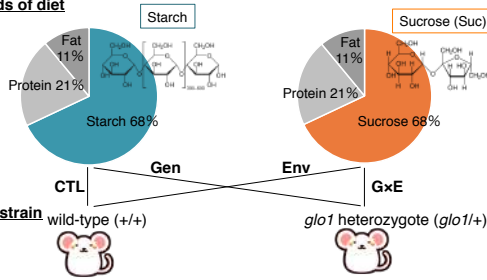

### Mouse strain

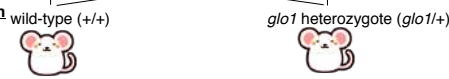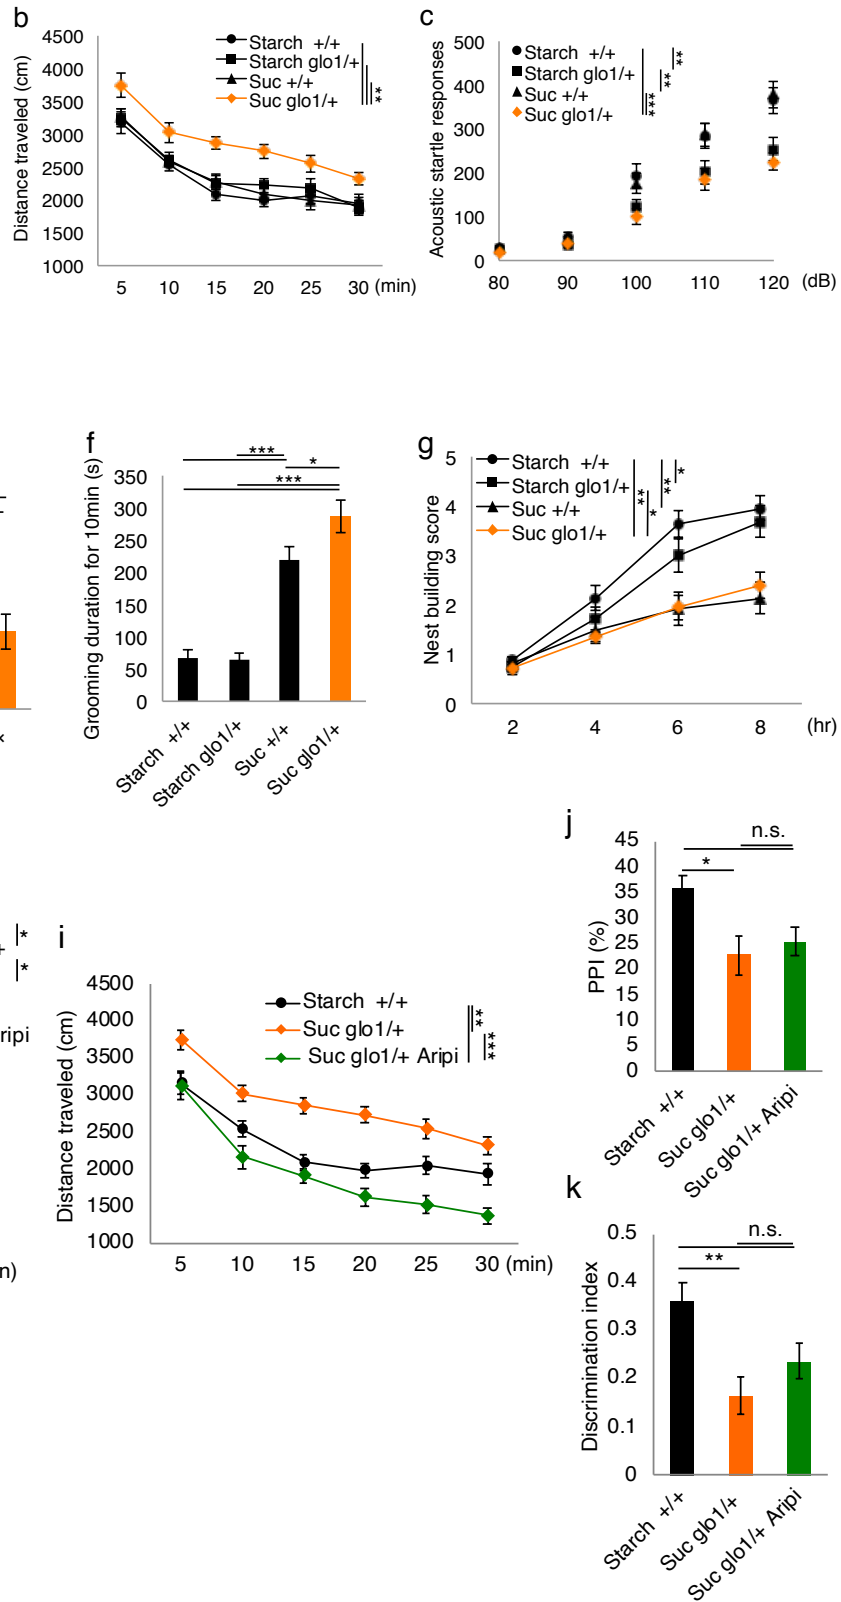

Figure 1

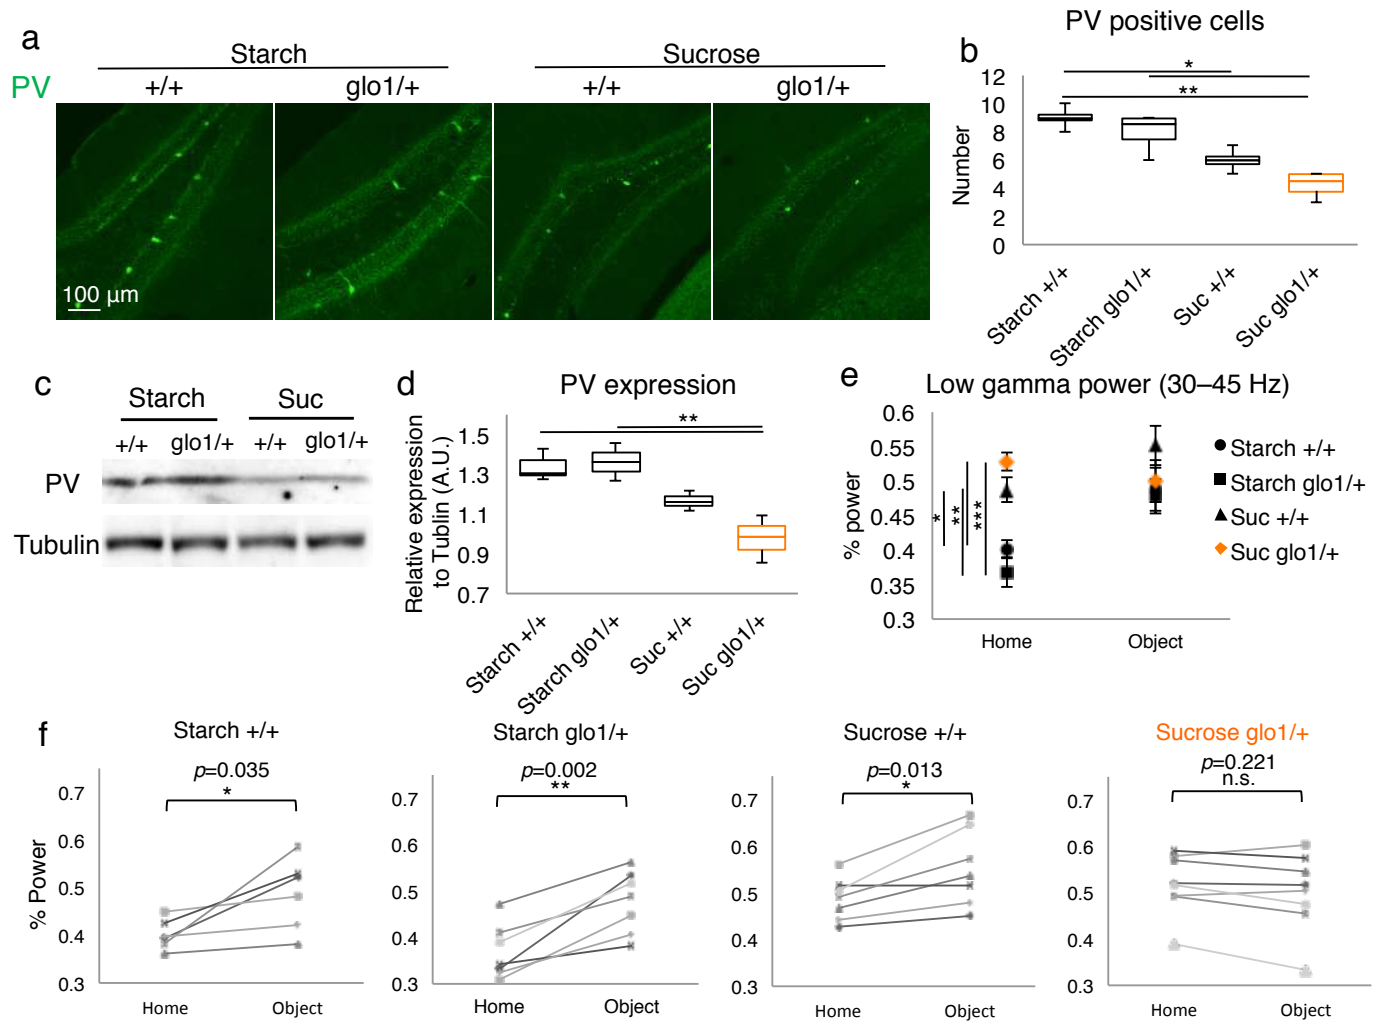

Figure 2

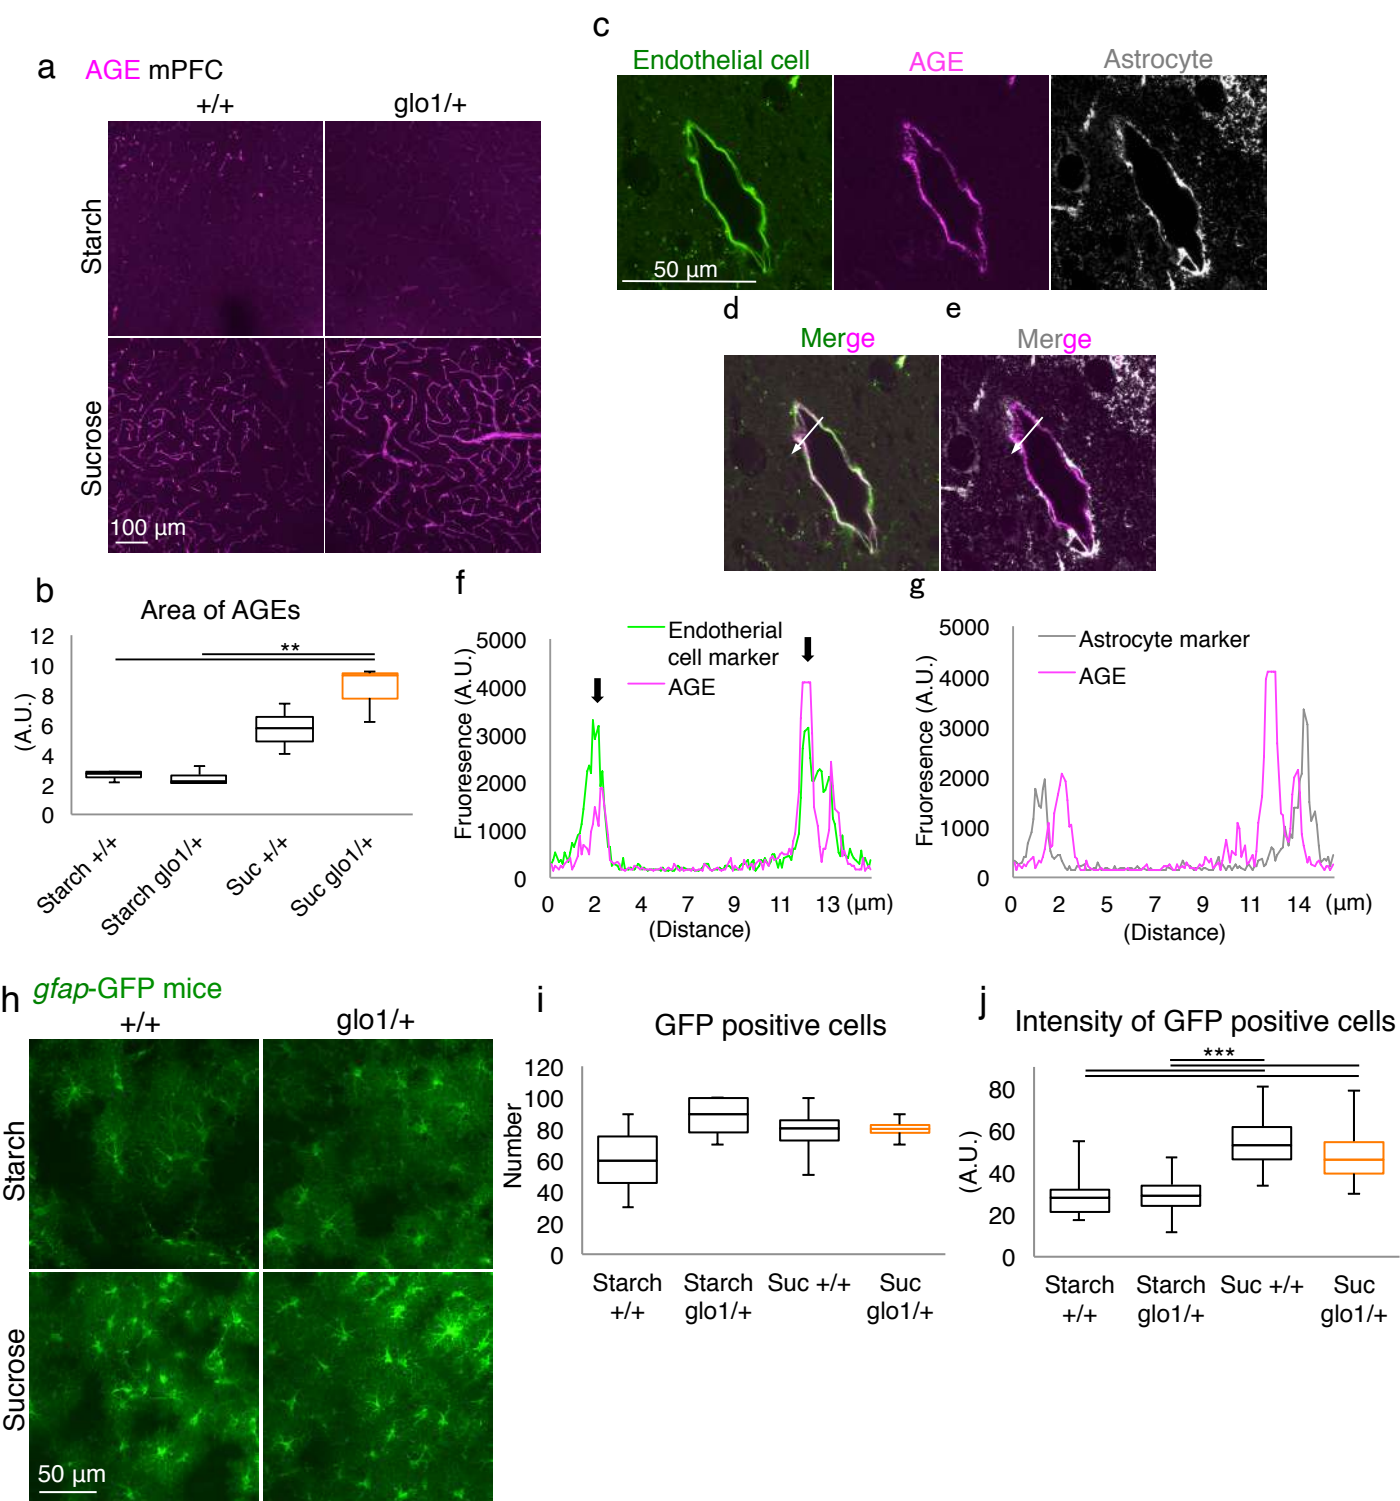

Figure 3

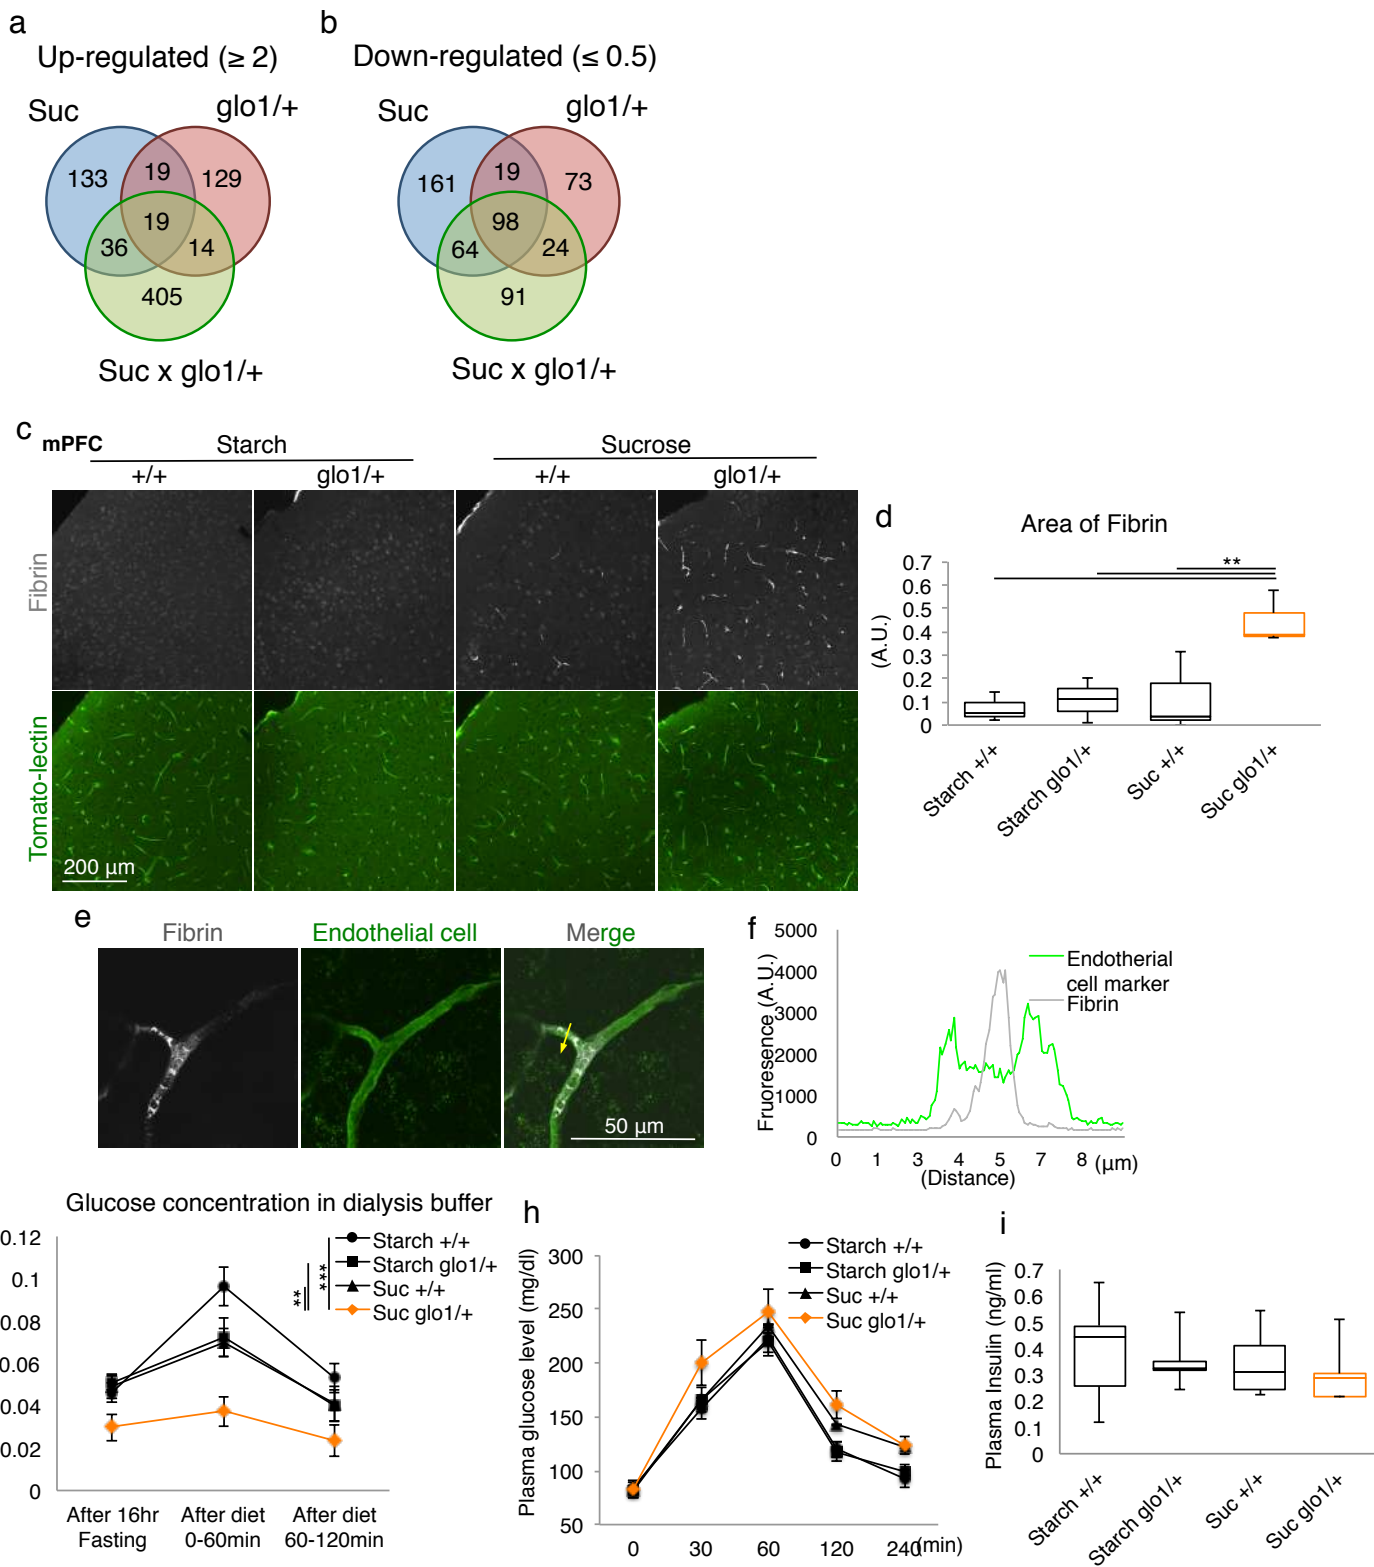

**Figure 4**

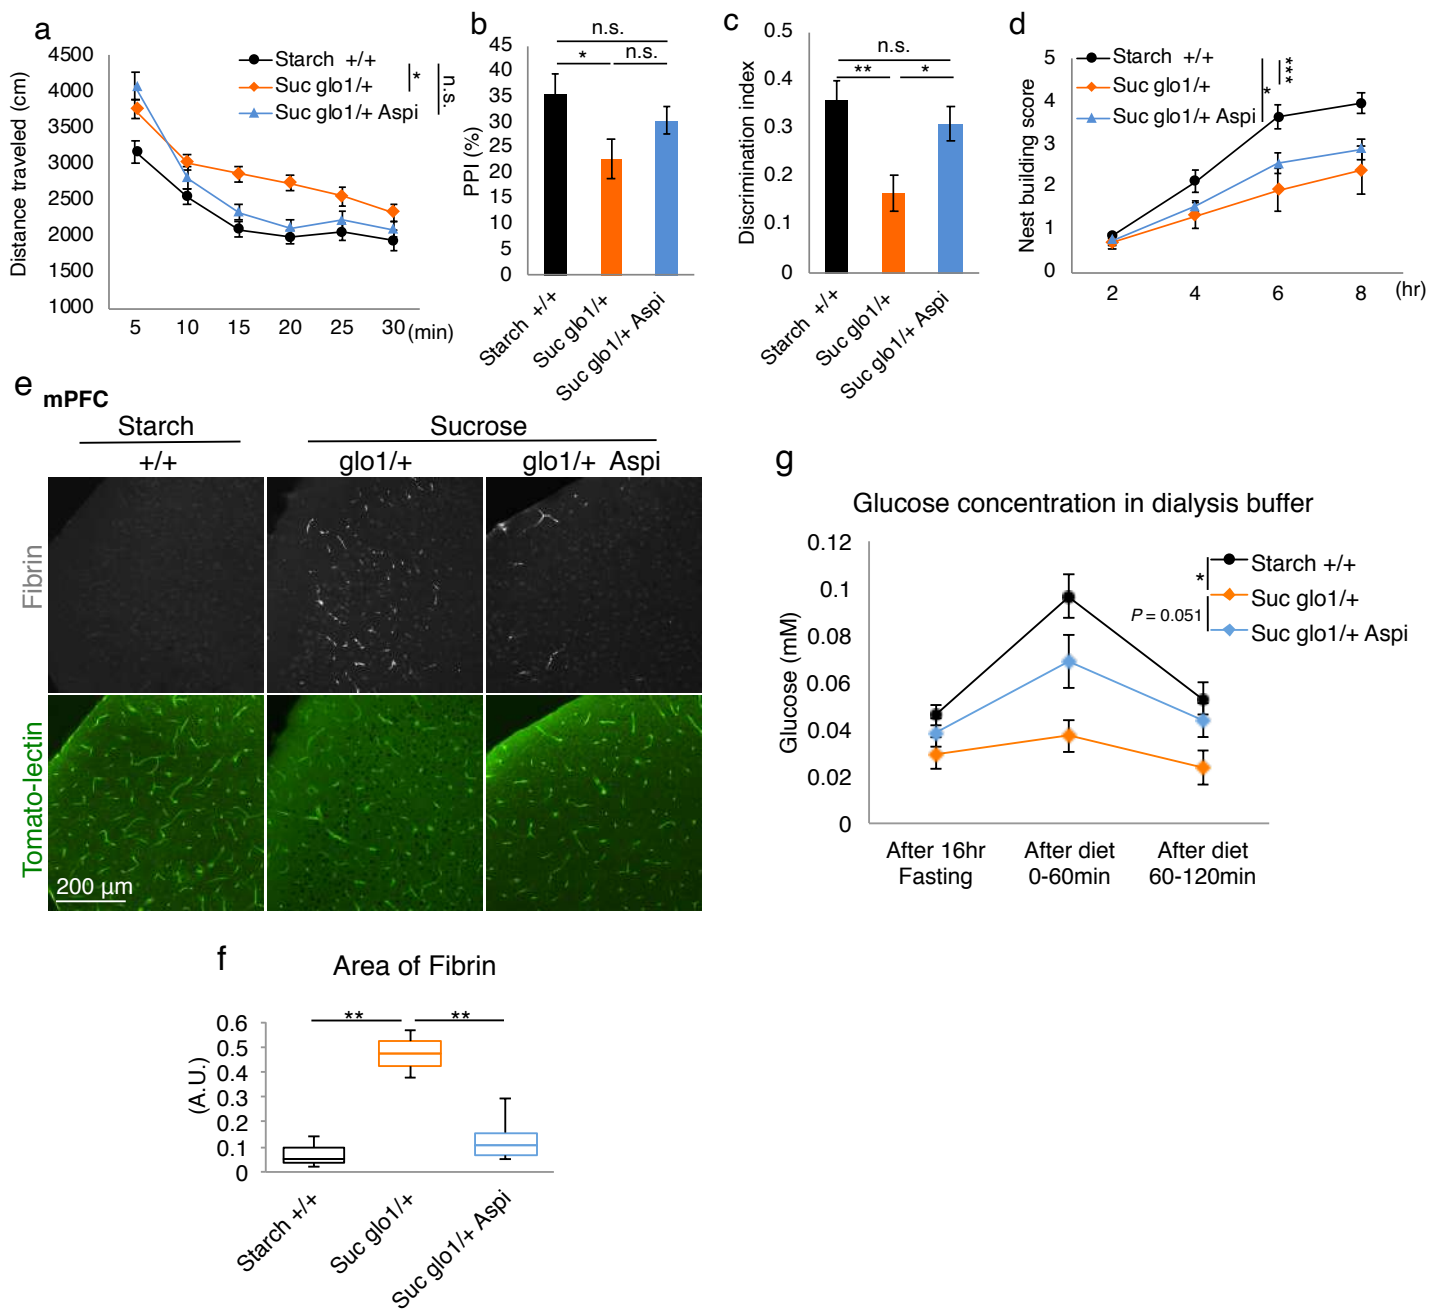

Figure5



a < DLPFC BA9 αFibrin >

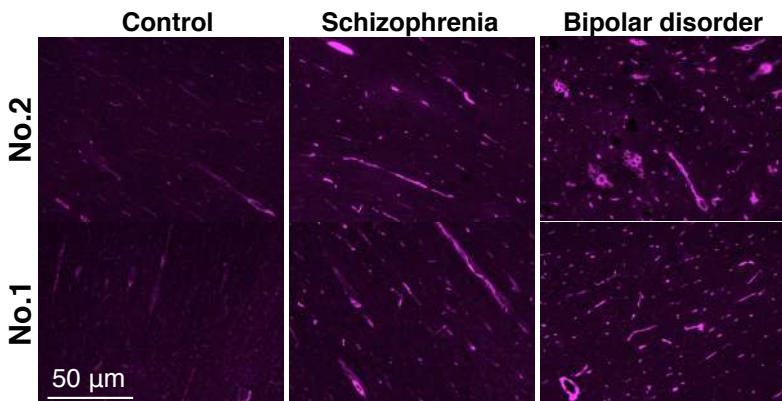

b Area of Fibrin

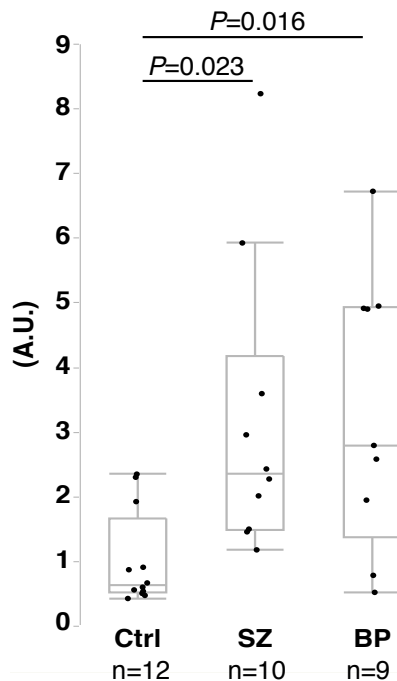

c Schizophrenia No.3

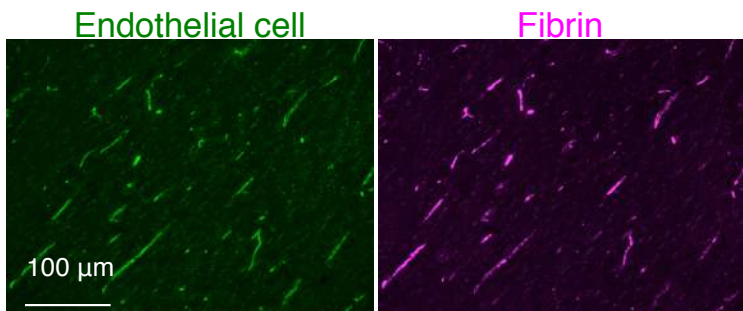

d

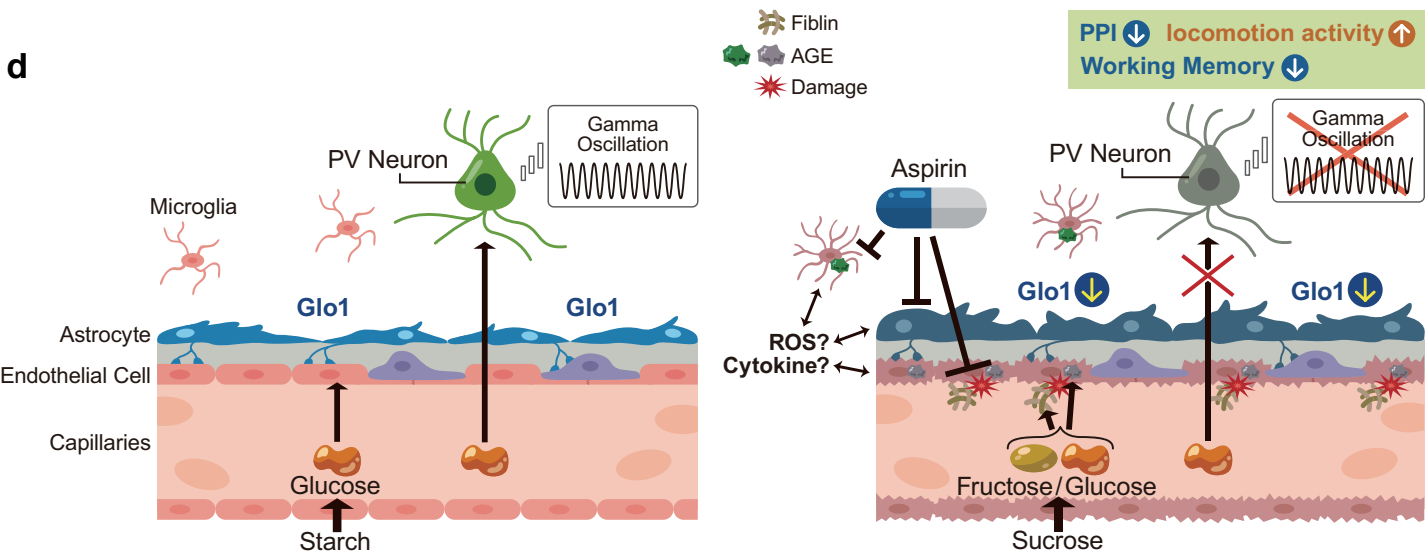

Figure 6
