1 **Title: High Sucrose Diets Contribute to Brain Angiopathy with Impaired Glucose**

2 **Uptake, and Psychosis-related Higher Brain Dysfunctions in Mice**

3 **Short title: Angiopathy in mice and humans with psychosis**

4 **Authors: Shinobu Hirai<sup>1,†</sup>, Hideki Miwa<sup>1,2</sup>, Tomoko Tanaka<sup>1</sup>, Kazuya Toriumi<sup>3</sup>,**

5 **Yasuto Kunii<sup>4</sup>, Hiroko Shimbo<sup>1</sup>, Takuya Sakamoto<sup>5</sup>, Mizuki Hino<sup>4</sup>, Ryuta Izumi<sup>4</sup>,**

6 **Atsuko Nagaoka<sup>4</sup>, Hirooki Yabe<sup>4</sup>, Tomoya Nakamachi<sup>6</sup>, Seiji Shioda<sup>7</sup>, Takashi Dan<sup>8</sup>,**

7 **Toshio Miyata<sup>8</sup>, Yasumasa Nishito<sup>9</sup>, Kazuhiro Suzuki<sup>3</sup>, Mitsuhiro Miyashita<sup>3</sup>,**

8 **Toshifumi Tomoda<sup>10</sup>, Takatoshi Hikida<sup>11</sup>, Junjiro Horiuchi<sup>12</sup>, Masanari Itokawa<sup>3</sup>,**

9 **Makoto Arai<sup>3</sup>, Haruo Okado<sup>1,†</sup>**

10

11 **Affiliations:** <sup>1</sup>Neural Development Project, Department of Brain Development and Neural

12 Regeneration, Tokyo Metropolitan Institute of Medical Science, Tokyo 156-8506, Japan.

13 <sup>2</sup>Molecular Neuropsychopharmacology Section, Department of Neuropsychopharmacology,

14 National Institute of Mental Health, National Center of Neurology and Psychiatry, Tokyo

15 187-8553, Japan.

16 <sup>3</sup>Schizophrenia Research Project, Department of Psychiatry and Behavioral Sciences, Tokyo

17 Metropolitan Institute of Medical Science, Tokyo 156-8506, Japan.

- 1 <sup>4</sup>Department of Neuropsychiatry, School of Medicine, Fukushima Medical University,
- 2 Fukushima 960-1295, Japan.
- 3 <sup>5</sup>Department of Applied Biological Science, Faculty of Science and Technology, Tokyo
- 4 University of Science, 2641 Yamazaki, Noda, Chiba 278-8510, Japan.
- 5 <sup>6</sup>Laboratory of Regulatory Biology, Graduate School of Science and Engineering,
- 6 University of Toyama, Toyama 930-8555, Japan.
- 7 <sup>7</sup> Department of Clinical Pharmacy, Shonan University of Medical Sciences, Yokohama
- 8 244-0806, Japan
- 9 <sup>8</sup>Division of Molecular Medicine and Therapy, Tohoku University Graduate School of
- 10 Medicine, Miyagi 980-8575, Japan.
- 11 <sup>9</sup>Center for Basic Technology Research, Tokyo Metropolitan Institute of Medical Science,
- 12 Tokyo 156-8506, Japan.
- 13 <sup>10</sup>Centre for Addiction and Mental Health, Campbell Family Mental Health Research
- 14 Institute, University of Toronto, Toronto, Ontario M5T 1R8, Canada.
- 15 <sup>11</sup>Department of Laboratory for Advanced Brain Functions, Institute for Protein
- 16 Research, *Osaka* University, Osaka 565-0871, Japan.
- 17 <sup>12</sup>Tokyo Metropolitan Institute of Medical Science, Tokyo 156-8506, Japan.
- 18

1 †These authors contributed equally to this work.

2 Correspondence should be addressed to Shinobu Hirai and Haruo Okado, Neural

3 Development Project, Department of Brain Development and Neural Regeneration, Tokyo

4 Metropolitan Institute of Medical Science, Tokyo 156-8506, Japan.

5 E-mail: [hirai-sn@igakuken.or.jp](mailto:hirai-sn@igakuken.or.jp) (S.H.) and [okado-hr@igakuken.or.jp](mailto:okado-hr@igakuken.or.jp) (H.O.)

6

7 **Abstract:** Metabolic dysfunction is thought to contribute to the severity of psychiatric  
8 disorders; however, it has been unclear whether current high-simple-sugar diets contribute  
9 to pathogenesis of these diseases. Here we demonstrate that a high-sucrose diet during  
10 adolescence induces psychosis-related behavioral endophenotypes, including hyperactivity,  
11 poor working memory, impaired sensory gating, and disrupted interneuron function in mice  
12 deficient for glyoxalase-1 (Glo1), an enzyme involved in detoxification of sucrose  
13 metabolites. Further, the high-sucrose diet induced microcapillary impairments and reduced  
14 brain glucose uptake in brains of *Glo1* deficient mice. Aspirin protected against this  
15 angiopathy, enhancing brain glucose uptake, and preventing abnormal behavioral  
16 phenotypes. Similar vascular damage to our model mice was found in the brains of  
17 randomly collected schizophrenia and bipolar disorder patients, suggesting that psychiatric

1 disorders are associated with angiopathy in the brain caused by various environmental  
2 stresses, including metabolic stress.

3

#### 4 **Introduction:**

5 Considering the global increase in consumption of simple sugars, the World Health  
6 Organization published guidelines that addressed concerns regarding body weight gain and  
7 dental caries development in 1995 (1). High-sugar intake alone increases the risks of  
8 numerous chronic diseases, including diabetes, hypertension, and kidney disease. However,  
9 there are few studies on the effects of high-sugar intake during adolescence on future mental  
10 health. The daily caloric intake from simple sugar by teenagers is higher than that observed  
11 for other age groups (~20% of total daily caloric intake) (2). Most chronic psychiatric  
12 disorders, including schizophrenia (SZ) and bipolar disorder (BD) discussed in the present  
13 study, develop before the age of 30 via complex interactions among multiple genetic and  
14 environmental risk factors. Interestingly, patients with SZ and BD consume approximately  
15 2-fold more sugar than age-matched healthy individuals, and patients with SZ who consume  
16 more sucrose exhibit more severe symptoms (3-5). Moreover, the odds ratios for mental  
17 distress, hyperactivity, and behavioral disorders were the highest among adolescents who  
18 self-reported the highest consumption of soft drinks (6).

1       Advanced glycation end products (AGEs) and reactive carbonyl compounds are  
2       produced from irreversible non-enzymatic crosslinking reactions between  
3       carbonyl-containing molecules (e.g. sugars, reactive carbonyl compounds) and other  
4       molecules (e.g. amino groups of proteins), and AGEs can lead to the induction of  
5       inflammation and oxidative stress in various tissues, leading to a positive feedback loop that  
6       further increases AGEs (7). There is substantial evidence that patients with psychiatric  
7       disorders have elevated proinflammatory cytokines (e.g. interleukin (IL)-1 $\beta$ , IL-6) and  
8       increased oxidative stress (8-11). Glyoxalase I (GLO1) is a zinc metalloenzyme that  
9       protects cells from AGE toxicity by catalyzing the reaction between the reactive carbonyl  
10      compound methylglyoxal to glutathione to form S-lactoyl-glutathione (12). Patients with  
11      depressive-state BD and major depressive disorder have reduced amounts of GLO1,  
12      suggesting that this reduction, in combination with an increase in sugar consumption, may be  
13      a cause of the increased inflammation and oxidative stress observed in these diseases (13).  
14      Furthermore, a SZ patient exhibiting poor convalescence is found to harbor a frameshift  
15      mutation in *GLO1* leading to reduced enzyme activity (14, 15).

16      Despite accumulating evidence, it is still unproven that excessive sugar intake  
17      contributes to the pathogenesis of psychiatric disorders among susceptible individuals. We  
18      addressed this question by generating mice with psychosis-related phenotypes associated

1 the gene  $\times$  environment interactions ( $G \times E$ ) to determine whether excessive sucrose  
2 consumption during adolescence is a novel environmental risk factor for SZ and BD. We  
3 further identified angiopathy in mice with high-sucrose intake and genetic vulnerability, and  
4 confirmed similar vascular damage in randomly collected brain samples from BD and SZ  
5 patients. This suggests that a variety of genetic and environmental factors can adversely  
6 affect brain capillaries. In addition, we found that chronic anti-inflammatory drug treatment  
7 prevented core phenotypes of psychiatric disorders as well as vascular damage, suggesting  
8 that angiopathy may have an important influence on the development and/or condition of  
9 psychiatric disorders.

10

## 11 **Results**

### 12 **Psychosis-related behavioral phenotypes in mice on a high-sucrose diet**

13 We fed mice one of two diets containing the same total calories and caloric proportions  
14 of carbohydrates, fat, and proteins, but with either starch or sucrose as the main  
15 carbohydrate (Fig. 1A). We investigated four groups of mice fed these diets for 50 days  
16 immediately after weaning (from postnatal day 21, corresponding to the juvenile/adolescent  
17 stage): starch-fed wild-type (WT) mice (control, CTL), sucrose-fed WT mice  
18 (environmental stressor, Env), starch-fed *Glo1* heterozygous knockout (*Glo1*/+) mice

1 (genetic factor, Gen), and sucrose-fed *Glo1*<sup>+/+</sup> mice ( $G \times E$ ) (Fig. 1A). Reduced *Glo1*  
2 expression in *Glo1*<sup>+/+</sup> mice was confirmed in the cerebral cortices, including the  
3 hippocampus, using western blotting (fig. S1A, B). The body weight trajectories of these  
4 mice were similar to those of control mice for at least 11 weeks of age, indicative of normal  
5 structural development (fig. S1C) and removing obesity as a possible cause of the observed  
6 group differences described below. We tested eight different behaviors in mice, including  
7 open-field locomotor activity (Fig. 1B), acoustic startle response (Fig. 1C), pre-pulse  
8 inhibition (PPI; a measure of sensory-motor gating) (Fig. 1D), object location performance  
9 (used as a test of working memory) (Fig. 1E), self-grooming (Fig. 1F), nest building (Fig.  
10 1G), elevated plus maze activity (fig. S2A), and social interaction (fig. S2B). These  
11 behaviors could be classified into those that are not affected by either diet or genotype,  
12 those that are affected by genotype but not diet, those affected by diet but not genotype, and  
13 those affected by the combination of diet and genotype. Thus, neither diet nor genotype, nor  
14 a combination of diet and genotype had any significant effect on social interactions (fig.  
15 S2B), while acoustic startle responses were reduced in *Glo1*<sup>+/+</sup> mice but not significantly  
16 affected by feeding type (Fig. 1C). Self-grooming (Fig. 1F), nest building (Fig. 1G), and  
17 elevated plus maze activity (fig. S2A) were affected by diet, but not genotype, while open  
18 field locomotor activity, PPI, and object location performance required a combination of

1 sucrose feeding and a *Glo1*/+ genotype to be affected. In the open field test (Fig. 1B),  
2 neither starch-fed *Glo1*/+ mice, nor sucrose-fed WT mice, showed significant differences in  
3 distance traveled compared to starch-fed WT mice, while sucrose-fed *Glo1*/+ mice showed  
4 significant increases. Similarly, starch-fed *Glo1*/+ mice and sucrose-fed WT mice had  
5 similar PPI scores compared to starch-fed WT mice, while sucrose-fed *Glo1*/+ mice showed  
6 significant decreases (Fig. 1D). Sucrose-fed WT mice had a non-significant reduction in  
7 object location test scores, and this reduction became significant in sucrose-fed *Glo1*/+  
8 mice (Fig. 1E). Altogether, our results suggest that a combination of sucrose feeding and  
9 *Glo1*/+ mutation can generate novel phenotypes reminiscent of psychiatric disease  
10 phenotypes that are not found by altering diet or genotype alone.

11 To further support our idea that synthetic G × E interactions may induce or enhance the  
12 severity of psychosis-like symptoms, we examined the effects of the high sucrose diet on an  
13 additional major psychosis-associated mutation in *Disrupted-in-schizophrenia 1 (DISC1)*  
14 locus (*16*) (fig. S3). *DISC1* plays important roles in neurodevelopment and synaptic activity,  
15 but a loss-of-function mutation in *DISC1* gene alone is not sufficient to cause psychiatric  
16 disorders (*17*). Similar to the results for *Glo1*/+ mice, *Disc1*/+ mice fed a high sucrose diet (G  
17 × E mice) showed severely impaired object location performance (working memory) and PPI  
18 (fig. S3C, D), whereas WT mice fed a high sucrose diet or *Disc1*/+ mice fed control diet did



1 not, again suggesting that a combination of genetic and environmental influences can  
2 induce psychosis-like behaviors.

3 Schizophrenia (SZ) is associated with increased amphetamine-induced dopamine release  
4 in the striatum (18, 19) and unbalanced dopamine regulation between the medial prefrontal  
5 cortex (mPFC) and striatum (20). To examine the effects of high sucrose diet on dopamine  
6 release in *Glo1*<sup>+/+</sup> mice, we next measured dopamine levels in the nucleus accumbens (NAc)  
7 and mPFC of these mice using *in vivo* microdialysis. We found that the high sucrose diet  
8 increased both basal and amphetamine-induced dopamine release in the NAc specifically in  
9 *Glo1*<sup>+/+</sup> mice (Fig. 1H), while reducing basal dopamine release in the mPFC in either genetic  
10 background (fig. S2C). To assess whether enhanced dopamine release in the NAc could  
11 induce the observed behavioral phenotypes, we examined the effects of aripiprazole, a D2  
12 receptor partial agonist and clinical antipsychotic (21), administered during the last 7 days (0.5  
13 mg/kg/day) of sucrose feeding (Fig. 1A, I, J and fig. S2D–I). We found that the  
14 hyper-locomotion and increased striatal dopamine release in  $G \times E$  mice were completely  
15 reversed by aripiprazole treatment (Fig. 1I, J), while other behavioral defects were not  
16 improved (fig. S2D–I). Thus, aripiprazole treatment selectively improves a subset of  
17 behavioral abnormalities in  $G \times E$  mice that are likely caused by dysregulated dopamine  
18 signaling.

1

## 2 **Dysfunction of parvalbumin-positive inhibitory interneurons in G × E mice**

3 A reduction in density of parvalbumin (PV)-positive GABAergic interneurons is  
4 reported for schizophrenia (22-25), and the precisely coordinated activity of these neurons  
5 is crucial for the regulation of PPI and working memory (26). Thus, we next investigated  
6 PV expression using immunohistochemistry and western blotting to determine whether  
7 alterations in PV signaling may contribute to our observed psychiatric disease-associated  
8 phenotypes. A high sucrose diet caused a reduction in PV-positive cells in both *Glo1*/+ and  
9 WT mice (Fig. 2A, B) and significantly reduced PV expression in sucrose-fed *Glo1*/+ mice  
10 (Fig. 2C, D), suggesting that the sucrose diet and the *Glo1*/+ mutation had additive or  
11 synergistic effects on PV signaling. Since gamma oscillations are produced via the  
12 synchronous activation of PV neurons, we measured gamma oscillations (30–45 Hz) using  
13 surface electroencephalography (EEG) to determine whether downregulation of PV protein  
14 was accompanied by functional abnormalities in neural activity. Interestingly, sucrose-fed  
15 mice (WT and *Glo1*/+ mice) exhibited elevated baseline gamma oscillation power  
16 compared with control mice (starch-fed WT) in the home cage (Fig. 2E). Further, only  
17 sucrose-fed *Glo1*/+ mice failed to exhibit an increase in the gamma oscillation power when  
18 approaching a novel object (Fig. 2F). These results are consistent with findings in patients

1 with SZ and BD as well as other mouse models of psychosis demonstrating increased  
2 baseline gamma oscillations and decreased sensory stimulus-evoked synchronized gamma  
3 power (27, 28). Thus, our results suggest that  $G \times E$  mice mimic the pathophysiological  
4 changes of PV neurons observed in psychiatric disorders.

5 To summarize, the administration of a high-sucrose diet to *Glo1*<sup>+/+</sup> mice induces  
6 behavioral, histological, and pathophysiological phenotypes reminiscent of phenotypes  
7 observed in psychiatric disorders. This suggests that excessive sucrose intake during  
8 adolescence is a potential environmental risk factor for these diseases.

9

## 10 **AGE accumulation and impaired astrocyte function in $G \times E$ mice**

11 How does a decrease in GLO1 expression and an increase in sucrose consumption  
12 lead to defects in activity of PV and dopaminergic neurons? We first examined GLO1  
13 expression and detected high expression in astrocytes (fig. S4A–G), especially those  
14 surrounding capillaries (fig. S4B, C), moderate expression in neurons (fig. S4H, I), and low  
15 expression (below detection limits) in vascular endothelial cells (fig. S4A–G) and  
16 microglial cells (fig. S4H, J). Expression was not detected in the brains of *Glo1*  
17 homozygous mice (fig. S3K) indicating that the antibody we used was specific for GLO1.

1           Since both GLO1 and a high sucrose diet are associated with glycation toxicity, we  
2 next examined AGE immunoreactivity to detect levels of AGE products of glucose  
3 metabolism and/or chemical reaction of glucose. We found stronger AGE immunoreactive  
4 signals in the vascular endothelial cells of G × E mice compared with control mice (Fig.  
5 3A–H). Moreover, we detected AGE products of methylglyoxal metabolism and/or  
6 chemical reaction of methylglyoxal using AGE-4 antibody, in the microglia of sucrose-fed  
7 mice (fig. S5A–E). Compared to controls, AGE accumulation in sucrose-fed *Glo1*<sup>+/+</sup> mice  
8 was accompanied by elevated IBA1 immunofluorescence intensity and an enlarged  
9 CD68-positive area (fig. S5F, G, H), both of which are phenotypes identified in activated  
10 microglia (29, 30). Thus, sucrose feeding in *Glo1*<sup>+/+</sup> mice results in microglial and  
11 endothelial AGE accumulation and microglial activation.

12           Since astrocytes express *Glo1* most strongly (fig. S4A–G), we next used mice  
13 expressing green fluorescent protein (GFP) under control of the glial fibrillary acid protein  
14 (GFAP) promoter (31, 32) to evaluate how astrocytes are affected in our G x E condition.  
15 Typically, cellular damage from AGEs is caused by inflammatory responses induced by  
16 Receptor of AGEs (RAGE) activation or by a loss of normal protein function following  
17 AGE-forming reactions (33). Astrocytes exhibit a well-described reactive phenotype in  
18 response to pathogenic conditions including neuroinflammation characterized by enhanced

1 GFAP expression (34, 35). Strongly enhanced *GFAP* promoter function was observed in G  
2 × E mice, without changes in the number of GFAP-positive astrocytes (Fig. 3I–K),  
3 indicating that the astrocytes in G × E mice are in the reactive pre-condition during the  
4 high-sucrose feeding. Taken together, these results suggest that a high sucrose diet enhances  
5 AGE production in endothelial cells and microglia (Fig. 3A–H and fig. S5A–E), and  
6 converts astrocytes into a pre-inflammatory state in *Glo1*-deficient mice (Fig. 3I–K).

7

#### 8 **Microcapillary angiopathy and impaired glucose intake in G × E mice**

9 Endothelial cells and astrocytes are functional and physical components of the  
10 blood-brain barrier (BBB) which tightly controls the parenchymal environment by  
11 modulating the selective passage of nutrients and various factors (36). Thus, endothelial  
12 AGE accumulation and astrocyte reactivity may impair BBB function. To examine changes  
13 in endothelial function, we first conducted a transcriptome analysis of the prefrontal cortex  
14 (PFC), a region strongly implicated in psychiatric impairments, using microarrays (Fig. 4A,  
15 B). The coagulation factor V, essential for the production of fibrin from fibrinogen, ranked  
16 seventh on a list of transcripts exhibiting more than doubled expression in G × E mice  
17 compared with the other three groups (Fig. 4A, Supplementary Table 1, 2). Fibrin controls  
18 hemostasis via polymerization with platelets to form blood clots, and deposits of this protein

1 are indicative of endothelial abnormalities (37). In early stages of endothelial cell  
2 impairment, fibrin accumulates in capillaries. Therefore, we investigated vascular fibrin  
3 accumulation using immunohistochemistry and confirmed the presence of significant fibrin  
4 accumulation on the vascular lumen side of endothelial cells in brain capillaries of  $G \times E$   
5 mice (Fig. 4C–G). Fibrin leakage and deposition in the brain parenchyma, as observed in  
6 Alzheimer’s disease, was not detected in  $G \times E$  mice, indicating that physical BBB  
7 disruption did not occur (38).

8         We next speculated that the abnormal vascular endothelial cells and astrocytes  
9 observed in  $G \times E$  mice could alter glucose uptake from the plasma into the brain  
10 parenchyma. Extracellular glucose concentrations in the brain parenchyma were measured  
11 under three conditions: 1) fasting, 2) 1 h after feeding, and 3) 2 h after feeding. We first  
12 measured a baseline glucose concentration in the mPFC in starch-fed WT mice after  
13 starvation for 16 hrs (Fig. 4H). This concentration increased significantly within an hour  
14 after starch feeding, and decreased close to baseline 2 hrs after feeding. Sucrose-fed WT  
15 mice and starch-fed *Glo1*<sup>+/+</sup> mice had similar baseline glucose concentrations, similar  
16 increases 1 hr after starch or sucrose feeding, and similar decreases back to baseline 2 hrs  
17 after feeding. In contrast, sucrose-fed *Glo1*<sup>+/+</sup> mice had both significantly decreased basal  
18 glucose concentrations in the mPFC, and no apparent increase in glucose concentrations

1 after sucrose feeding. We measured vascular diameter and expression of glucose transporter  
2 1, the major glucose transporter expressed in vascular endothelial cells and astrocytes, and  
3 observed no differences among the four groups (fig. S6). Further, no differences were  
4 detected in plasma glucose after starvation and feeding, or in fasting plasma insulin levels  
5 among the four groups (Fig. 4I, J), indicating that the lower parenchymal glucose  
6 concentrations in  $G \times E$  mice is due to reduced uptake across the BBB rather than  
7 dysregulation of plasma glucose or insulin signaling.

8

9 **Protective effects of chronic low-dose aspirin against behavioral abnormalities and**  
10 **angiopathy**

11 Previous reports have shown that adjunct non-steroidal anti-inflammatory drug (NSAID)  
12 treatment can improve psychiatric disorder scores (39, 40). Aspirin, an NSAID, is routinely  
13 used for the prevention and alleviation of vascular-related adverse events associated with  
14 high blood pressure, ischemia, and cardiovascular diseases (41, 42). Here, we examined  
15 whether aspirin treatment can protect against the development of psychiatric phenotypes in  
16  $G \times E$  mice (Fig. 1A, Fig. 5A–D and fig. S7A–I). Low-dose aspirin (1 mg/kg/day) fully  
17 prevented hyperlocomotor activity, deficits in PPI, working memory, grooming duration  
18 (Fig. 5A–D), and partially prevented abnormal enhancement of DA release after

1 methamphetamine administration and reduced PV expression among  $G \times E$  mice (fig.  
2 S7D–F), but did not improve acoustic startle responses, nest building and elevated plus  
3 maze scores and abnormal astrocyte activation (fig. S7A–C, G–I). These improvements  
4 were accompanied by a decrease in endothelial fibrin accumulation (Fig. 5E, F) and a  
5 partial restoration of glucose intake into the brain parenchyma (Fig. 5G). Collectively, these  
6 results suggest that aspirin treatment in  $G \times E$  mice significantly improves angiopathy and  
7 brain glucose availability, contributing to prevention of several behavioral abnormalities.

8

### 9 **Angiopathy in postmortem brains of patients with psychiatric disorders**

10 Finally, we compared immunostains of brain slices from healthy controls and patients with  
11 SZ or BD to examine whether these patients exhibit angiopathic fibrin accumulation in  
12 vascular endothelial cells. Similar to our findings in  $G \times E$  mice, we found significantly  
13 elevated fibrin accumulation in the vascular endothelium of brain slices from randomly  
14 collected SZ and BD patients (Fig. 6A–C). Therefore, fibrin-related angiopathy and  
15 vascular damage may be a novel and common phenotype of psychiatric illness contributing  
16 to disease progression.

17

### 18 **Discussion**

[ここに入力]



1        Using a mouse model, we demonstrated that high dietary sucrose consumption during  
2        adolescence is a potential risk factor for the development of behavioral phenotypes  
3        associated with psychiatric illnesses, such as SZ and BD. These behavioral phenotypes  
4        include impaired sensory gating, dysfunctions in PV interneurons and working memory,  
5        hyperactivity, and increased basal and stimulus-evoked striatal dopamine release. Second,  
6        we identified endothelial fibrin accumulation (“angiopathy”) in both our mouse model and  
7        in randomly collected postmortem brains of patients with SZ or BD. We also observed that  
8        glucose intake from the plasma into the brain parenchyma was impaired in  $G \times E$  mouse  
9        model. Chronic low-dose aspirin treatment prevented fibrin deposition in the capillaries,  
10       improved glucose transport, and reversed several behavioral phenotypes in  $G \times E$  mice,  
11       suggesting angiopathy as a seminal pathogenic event in mental illness.

12       In Fig. 6D we propose a possible model summarizing our results. A high sucrose diet  
13       causes AGE accumulation in microglia and endothelial cells which express low amounts of  
14       GLO1 (Fig. 3A–H and fig. S5A–E). Astrocytes are less sensitive to this diet in WT animals  
15       because they express high amounts of GLO1 to relieve glycation stress (fig.  
16       S4A–G). However, the reduced GLO1 in *Glo1*<sup>+/−</sup> mice causes astrocytes to become  
17       activated by a high sucrose diet (Fig. 3I–K). This activation may be caused directly by  
18       glycation stress in astrocytes or may occur as a consequence of increased microglial and

1 endothelial AGEs. Astrocytic activation further increases microglial and endothelial AGEs  
2 in a positive feedback loop (7). Increased microglial and endothelial AGEs and astrocytic  
3 activation may induce fibrin accumulation and damage to the brain vasculature (33) (Fig.  
4 4C–G). This results in decreased glucose import into the brain and dopaminergic and PV  
5 neuron dysfunction which in turn cause psychosis-associated behavioral defects (Fig. 1B–H,  
6 Fig. 2 and Fig. 4H).

7 Strikingly, administration of the NSAID aspirin, which inhibits inflammation and  
8 oxidative stress, protected against the emergence of angiopathy as evidenced by reduced  
9 fibrin accumulation, partially restored parenchymal glucose concentrations, and prevention  
10 of several psychiatric-related phenotypes (Fig. 5 and fig. S7D–F). The increase in  
11 coagulation factor V and the accumulation of fibrin in endothelial cells in G x E mice  
12 indicate the presence of some vascular damage (43) (Fig. 4A–G). Aspirin may prevent this  
13 damage through its antiplatelet coagulation and anti-inflammatory properties. Since  
14 oxidative stress and chronic inflammation are also common features of psychiatric disorders,  
15 aspirin may provide a protective effect against the etiology of these diseases as well (8, 11,  
16 44, 45). We have tried to quantify ROSs in our experimental mice, but thus far have not  
17 been able to see differences among the four groups (fig. S8), so a more sensitive detection  
18 method such as FRET probe for ROS detection may be required.

1 Sucrose consists of glucose and fructose, when these sugars are ingested at the same time,  
2 we find that they generate AGEs in different cell types. Glucose-metabolism-derived AGEs,  
3 which can be detected using  $\alpha$ -AGE polyclonal antibody, accumulated primarily  
4 in vascular endothelial cells (Fig. 3A–H), while methylglyoxal-derived AGEs, recognized  
5 by the  $\alpha$ -AGE-4 monoclonal antibody accumulated specifically in microglia (fig. S5A–E).  
6 Our results suggest that these two cell types may import and metabolize these two sugars  
7 differently, but more detailed validation, such as one-cell metabolomic analysis, is required  
8 to validate this idea.

9 Robust PV neuron function is required for PPI, working memory,  
10 amphetamine-induced hyper-locomotion, dopamine (or 3,4-dihydroxyphenylacetic acid)  
11 release regulation, and gamma oscillation generation, all of which are considered core  
12 symptoms of psychiatric disorders (26). The PV neuron dysfunction in  $G \times E$  mice may be  
13 caused by the unique properties of these cells. PV-expressing interneurons are the  
14 fast-spiking neuron subtype exhibiting a lower input resistance and higher-amplitude rapid  
15 after-hyperpolarization than several projection neurons, and the combination of these  
16 properties generates higher frequency action potentials compared with those by other  
17 neuron types. This frequency of high action potentials in PV neurons can be exploited by  
18 their fast spike phenotype to produce fast oscillations (30-100 Hz) in the gamma band of

1 neural oscillations (46). To maintain this rapid spiking property, PV neurons require high  
2 energy expenditure as evidenced by mitochondrial and cytochrome c oxidase enrichment  
3 (47). Therefore, reduced glucose within the brain parenchyma may preferentially disturb PV  
4 neuron function, resulting in reduced PV expression. Indeed, reduced PV neuron number  
5 has been repeatedly reported in postmortem brains of patients with psychiatric disorders  
6 such as SZ and BP, and this reduction is proposed to be caused by a decrease in PV mRNA  
7 or protein expression in these cells, rather than by a loss of PV neurons themselves (22-25).  
8 Since PV is a Ca<sup>2+</sup> binding protein, proper regulation of the expression of this protein is  
9 considered to be important for maintaining the plasticity of PV neurons. For example, in PV  
10 neurons of the hippocampus and mPFC, the expression of PV protein changes after  
11 contextual fear conditioning, exposure to rich environments, and pharmacogenetic  
12 activation of PV neurons, suggesting PV expression and plasticity are correlated (25, 48).  
13 Further, it is known that the inhibitory activity of PV neurons is critical under  
14 environmental stress to prevent a sequela of excessive excitatory activity such as oxidative  
15 stress and inflammation (47). Pathogenic processes might more readily occur during the  
16 critical adolescent prodromal period, wherein PV neurons may have increased vulnerability  
17 to environmental stresses because of delayed maturation, which is another feature of PV  
18 neurons (49).

1           In the present study, we identified capillary angiopathy in both  $G \times E$  mice and  
2 postmortem brains of patients with SZ and BD (Fig. 4C–G and Fig. 6A–C). In our  $G \times E$   
3 mice, angiopathy was caused by the high AGE production capacity of sucrose combined  
4 with a GLO1 deficiency. Since high sugar consumption has been associated with SZ and  
5 BD, and decreased GLO1 expression and function have been seen in SZ and BD, similar  
6 interactions may be associated with some cases of psychiatric diseases. However, various  
7 other environmental stresses and genetic conditions may also converge to induce  
8 angiopathy. Several studies have reported that stressors, such as social defeat, isolation, and  
9 viral infection, induce vascular defects (50-52). These stressors are also risk factors for SZ  
10 and BD and induce PV neuron hypofunction (53), suggesting that angiopathy may be a  
11 common trigger for psychiatric phenotypes.

12

13 **Acknowledgments:** We thank Sayaka Ogikubo, Yoshie Matsumoto, Haimei Zhang,  
14 Minami Murata, Izumi Nohara, Yukiko Shimada, Emiko Hama, Nanako Obata, Mai  
15 Hatakenaka, and Chikako Ishida for their contribution to experiments related to this  
16 research. We also thank Dr. Tohru Kodama for explaining the procedures for microdialysis  
17 and encephalogram recording. We are grateful to Dr. Kenji Tanaka for reviewing the study.  
18 We acknowledge Chiaki Watanabe and Hiromi Onuma for coordinating the donations of

1 postmortem brains. Further, we thank Prof. Hideki Chiba for the preparation of postmortem  
2 brain samples. We express our gratitude to the families of the deceased individuals for the  
3 donations of brain tissue and their time and effort devoted to the consent process and  
4 interviews.

5  
6 **Funding:** This work was supported by the Japan Society for the Promotion of Science  
7 (KAKENHI grants 18K14832 to S.H., 17K18395 and 19K08033 to H.M., 17K16408 to  
8 T.T., and 18H02537 and 18K19383 to H.O.); the Ichiro Kanehara Foundation, Japan Prize  
9 Foundation, and Takeda Science Foundation (to S.H.); the Naito Foundation (to H.M.); the  
10 Strategic Research Program for Brain Sciences from AMED (grant JP19dm0107107 to  
11 H.Y.); and a Grant-in-Aid for Scientific Research on Innovative Areas from the MEXT  
12 (JP16H06277 to H.Y.). This research was also supported by KAKENHI Grant Numbers  
13 16H05380 (to M.A.), 18K06977 (to K.T.), 19H03589 (to M.I.), and 18K15354 (to K.S.) as  
14 well as AMED Grant Number JP19dm0107088 (to M.I.). This study was also supported by  
15 The Kanae Foundation for the Promotion of Medical Science (to K.T.) and The Uehara  
16 Memorial Foundation (to M.A.), and the Collaborative Research Program of Institute for  
17 Protein Research, Osaka University, ICR-21-3.

18

[ここに入力]

1 **Author contributions:** S.H. and H.O. designed the study. S.H. performed and analyzed all  
2 experiments. H.M. assisted with the experimental design of EEG recording and analysis of  
3 the results and edited the manuscript. T.T. coordinated the EEG recording. Y.K., M.H., R.I.,  
4 A.N., and H.Y. helped with the design of experiments using human specimens and provided  
5 fixed human brain sections. T.S. performed data and image analysis. T.N. and S.S. provided  
6 GFAP-GFP mice. T.D. and T.M. generated and provided *Glo1* knockout (KO) mice. K.T.  
7 and K.S. backcrossed *Glo1* KO mice to B6J mice for all experiments. Y.N. performed  
8 cDNA microarray analysis of gene expression. H.S. assisted with behavioral experiments.  
9 M.I., M.A., K.T., K.S., and M.M. provided important suggestions to this study. T. T. and T.  
10 H provided critical input on *Disc1-L1* mouse experiments. J.H. edited the manuscript. S.H.  
11 generated all figures, tables, and wrote the manuscript. H.O. edited the manuscript and  
12 supervised this study.

13

14 **Competing interests:** The authors declare no competing interests.

15 **Data and materials availability:** All materials used in this paper are available upon request.

16 The accession number for transcriptome analysis data is provided in the Materials and

17 Methods.

18

## 1 **Figure Legends**

### 2 **Fig. 1 Generation of G × E model mice and psychosis-related phenotype analyses.**

3 (A) Experimental Timeline. See Materials and Methods for a complete description. (B–G)

4 Behavioral analyses in the four groups of mice (n = 18–23 mice per group). (B)

5 Spontaneous locomotor activity in the open-field test. (C) Acoustic startle responses. (D)

6 Pre-pulse inhibition (PPI) using a 70 dB pre-pulse. (E) Object location test to evaluate

7 working memory. (F) Duration of self-grooming in the home cage. (G) Quantification of

8 nest-building skills over 8 h. Post hoc Dunnett’s multiple comparisons test among groups at

9 each time point indicated  $###p < 0.001$  for Suc *glol*/+ vs. Ctrl (Starch +/+),  $$$p < 0.01$  for

10 Suc +/+ vs. Ctrl (Starch +/+). (H, J) Extracellular dopamine (DA) concentration in the

11 nucleus accumbens measured at 20 min intervals using an *in vivo* microdialysis system in

12 the presence or absence of aripiprazole (Aripip). Methamphetamine (1.25 mg/kg) was

13 administered via intraperitoneal (i.p.) injection at time 0 (arrow) (n = 6–11 mice per group).

14 See Materials and Methods for detailed statistical analyses. (I) Effects of Aripip treatment on

15 locomotor activity (n = 12–18 mice per group). (B–H) Starch +/+ group was used as a

16 control for post hoc Dunnett’s test. All data are presented as mean ± SEM.  $***p < 0.001$ ,

17  $**p < 0.01$ ,  $*p < 0.05$

18



1 **Fig. 2 Parvalbumin-positive interneuron dysfunction in G × E mice.**

2 (A) Parvalbumin (PV) immunohistochemistry in the medial prefrontal cortex (mPFC). (B)

3 Number of PV-positive cells in the mPFC (n = 4 mice per group). (C) Western blot analysis of

4 PV protein expression using tubulin as internal control. (D) Densitometric analysis of PV

5 protein expression: PV band intensities were divided by the corresponding tubulin band

6 intensities (n = 3 mice per group). (E) Average gamma band power in the home cage and

7 during novel object recognition in the open field (n = 7–8 mice per group). (F) Changes in

8 gamma band power from the home cage to the novel object phase in individual mice (n = 7–8

9 mice per group). Each *p* value indicates the result of repeated measures analysis of variance

10 (ANOVA). The effect of changes in gamma power at Starch +/+ (F1, 5 = 8.29, *p* = 0.035), at

11 Starch *Glo1*/+ (F1, 6 = 29.75, *p* = 0.0016), at Sucrose +/+ (F1, 6 = 12.04, *p* = 0.013), at

12 Sucrose *Glo1*/+ (F1, 7 = 4.038, *p* = 0.084). (B, D, H) Starch +/+ group was used as control for

13 post hoc Dunnett's test. All data are presented as mean ± SEM. \*\*\**p* < 0.001, \*\**p* < 0.01, \**p*

14 < 0.05

15

16 **Fig. 3 AGE accumulation in the neurovascular endothelium and pre-inflammatory**

17 **status of astrocytes in G × E mice.**

1 (A) AGE immunohistochemistry in the medial prefrontal cortex. (B) Measurement of AGE  
2 immunoreactive area. The mean intensity of the AGE-immunopositive area in the entire  
3 image was measured for each section (n = 3 mice per group). (C–E) Colocalization of the  
4 endothelial cell marker tomato lectin with the astrocytic marker ALDH1L1 or AGEs. (F)  
5 Enlarged version of images in (C) presenting the region used for colocalization analysis.  
6 (G) 2D intensity histogram of the two indicated channels for identifying the colocalization  
7 of AGE with ALDH1L1 (Astrocyte) or tomato lectin (Endothelial cell). (H) Average  
8 R-value of colocalization data including (G) three different locations of three mice. (I)  
9 Immunohistological images of GFP-positive astrocytes and ALDH1L1 in the mPFC region  
10 and merged GFP/ALDH1L1 image. (J) Percentage of GFP-positive cells per total  
11 ALDH1L1-positive cells in each image in (I). (K) Mean fluorescent GFP intensities of 10  
12 randomly selected cells per image in (I) (from four independent mice). (B, J, K) The Starch  
13 +/- group was used as control for post hoc Dunnett's test. All data are presented as mean ±  
14 SEM. \*\*\* $p < 0.001$ , \*\* $p < 0.01$ , \* $p < 0.05$

15

16 **Fig. 4 Angiopathy and impaired glucose transport in G × E mice.**

17 (A, B) Venn graph showing overlap in prefrontal cortex genes exhibiting a >2-fold (A) or  
18 <0.5-fold (B) expression change compared with the control (CTL) group (n = 3 mice per

1 group). (C) Immunohistochemical images of fibrin and the endothelial cell marker tomato  
2 lectin. (D) Measurement of the area of fibrin immunoexpression in (C). The mean intensity  
3 of the fibrin-immunopositive area of the entire image was measured for each section (n = 4  
4 mice per group). (E) Magnified immunohistochemical images of fibrin and the endothelial  
5 cell marker tomato lectin. (F) 2D intensity histogram of the two indicated channels using  
6 the left and middle panels in (E) for identifying fibrin colocalization with tomato lectin. (G)  
7 Average R-value of colocalization data in (F) from three different locations of three mice.  
8 (H) Extracellular glucose concentrations in the dialysis buffer from mPFC samples at each  
9 time point (n = 5–6 mice per group). See the Materials and Methods for detailed statistical  
10 analyses. (I) Plasma glucose concentrations (n = 6–7 mice per group). The first  
11 measurement was performed after 16 h of fasting, and the second blood collection 30 min  
12 after eating 0.05 g of carbohydrates. (J) Fasting plasma insulin levels (n = 5–6 mice per  
13 group). (D, H–J) Starch +/+ group was used as a control for post hoc Dunnett's test. All  
14 data are presented as mean ± SEM. \**p* < 0.05

15

16 **Fig. 5 Protective effects of low-dose aspirin in G × E mice.**

17 (A–D) Results of behavioral tests performed to evaluate the effects of aspirin treatment (n =  
18 12–21 mice per group). (A) Quantification of spontaneous locomotor activity in the open

1 field. **(B)** Pre-pulse inhibition at 70 dB. **(C)** Object location test of working memory. **(D)**  
2 Quantification of nest-building skills over 8 h. **(E)** Immunohistochemical images of fibrin  
3 and the endothelial cell marker tomato lectin. **(F)** Measurement of the area of fibrin  
4 immunoexpression in **(E)**. The mean intensity of the fibrin-immunopositive area of the  
5 entire image was measured for each section (n = 3 mice per group). **(G)** Extracellular  
6 glucose concentrations in the dialysis buffer at each time point (n = 4–6 mice per group).  
7 Post hoc Tukey's multiple comparisons test of groups at each time point,  $^{####}p < 0.001$ ,  $^{##}p <$   
8  $0.01$ ,  $^{\#}p < 0.05$  for Starch  $+/+$  vs. Suc  $Glo1/+$ ,  $^{$$$}p < 0.001$ ,  $^{\$}p < 0.05$  for Starch  $+/+$  Asp vs.  
9 Suc  $Glo1/+$ ,  $^{\&}p < 0.05$  for Starch  $+/+$  vs. Suc  $Glo1/+$  Asp. All data are presented as mean  $\pm$   
10 SEM.  $^{***}p < 0.001$ ,  $^{**}p < 0.01$ ,  $^{*}p < 0.05$

11  
12 **Fig. 6 Angiopathy in postmortem brains from individuals with psychiatric disorders.**

13 **(A)** Representative immunohistochemical fibrin images in the BA9 region of postmortem  
14 brains from controls and patients with schizophrenia (SZ) or bipolar disorder. **(B)**  
15 Measurement of the area of fibrin immunoexpression in **(A)**. The mean intensity of the  
16 fibrin-immunopositive area of the entire image was measured for each section. **(C)**  
17 Representative immunohistochemical images of fibrin (magenta) and the endothelial cell  
18 marker tomato lectin (green) in postmortem brains from a patient with SZ. Fibrin-positive

1 areas are merged with areas of vascular endothelial cell marker expression. **(D)** Diagrams  
2 describing the hypothesis proposed to explain functional and behavioral abnormalities in  
3 control (CTL) mice (left) and G × E mice (right) (see the Discussion for details). All data  
4 are presented as mean ± SEM. \*\**p* < 0.01

5

## 6 **Materials and Methods**

### 7 **Experimental design (related to Fig.1A)**

8 After weaning (P21), wild-type (WT) and *Glo1* heterozygous mutant mice were fed either a  
9 starch diet (control) or a sucrose diet (experimental). Diets were equal in total calories and  
10 proportions of calories from carbohydrates, lipids, and proteins. The behavioral test battery  
11 was administered starting at 2.5 months of age (upper panel). Middle panel: Macronutrient  
12 composition of the two diets. We used *Glo1* heterozygous mice (or *Disc1* heterozygous  
13 mice) to mimic patients with psychiatric disorders who exhibit decreased GLO1 activity or  
14 expression (or decreased *Disc1* expression), whereas high-sucrose intake was used as an  
15 environmental risk factor (bottom panel). We investigated four groups of mice: WT,  
16 starch-fed mice (Starch +/+); *Glo1* (or *Disc1*) heterozygous, starch-fed mice (Starch *Glo1*/+  
17 (or Starch *Disc1*/+)); WT, sucrose-fed mice (Suc +/+); and *Glo1* (or *Disc1*) heterozygous,  
18 sucrose-fed mice (Suc *Glo1*/+ (or Suc *Disc1*/+)).

1

## 2 **Animals**

3 All experimental procedures were approved by the Animal Experimentation Ethics

4 Committee of the Tokyo Metropolitan Institute of Medical Science (49040). All mice were

5 maintained under a 12:12 h light:dark cycle (lights on at 8:00 AM) with free access to the

6 indicated diet. All efforts were made to minimize the number of animals used and their

7 suffering. *Glo1* knockout mice were generated as described previously (54, 55). Briefly,

8 *Glo1*-trapped ES cell lines from the International Gene Trap Consortium were used for the

9 generation of 3 founder mice, which were then backcrossed to C57BL/6 mice. In the

10 manuscript, trapped *Glo1* is referred to as *Glo1. Disc1-LI* (locus-impairment) heterozygous

11 mutant mice were generated as previously described (16). In the manuscript, *Disc1-LI* is

12 referred to as *Disc1*. Alternatively, mice were backcrossed to GFAP-GFP mice to monitor

13 astrocyte activation (31, 32). Male mice were exclusively used in the behavioral tests,

14 whereas mice of both sexes were used in histological, biochemical, and physiological

15 experiments.

16

## 17 **Diet preparation**

1 The two diets used in the present study were newly created in collaboration with Oriental  
2 Yeast Co. Ltd. (Tokyo, Japan). We named the sucrose diet HSD-70 (# OYC 2405100) and  
3 the starch diet HCD-70 (# OYC 2405000) (Supplementary Table 4). They contained the  
4 same caloric proportions of carbohydrate, fat, and protein; however, all carbohydrate  
5 calories are derived from either starch or sucrose.

6

## 7 **Drug preparation**

8 Aripiprazole was dissolved in acetic acid and diluted to 3.5 mg/L in water for  
9 administration at 0.5 mg/kg/day. The final acetic acid concentration in the drinking water  
10 was 0.7%. Aspirin was dissolved in ethanol and diluted to 70 mg/L in water for  
11 administration at 1 mg/kg/day. The final ethanol concentration in the drinking water was  
12 0.15%. The daily dose was based on the measurement of mean water consumption daily in  
13 all sucrose-fed *Glo1* heterozygous mice and starch-fed wild-type (WT) mice (fig. S1D, E).  
14 There were no between-group differences in terms of aripiprazole consumption (Student's  
15 *t*-test, Starch +/+ and Suc *Glo1*/+:  $p = 0.86$ ) or aspirin-containing water (Student's *t*-test,  
16 Starch +/+ and Suc *Glo1*/+:  $p = 0.61$ ).

17

## 18 **Behavioral tests**

[ここに入力]

1 Mice were habituated in the behavioral room for >30 min before each test. Behavioral tests  
2 were performed in the following sequence of increasing stress: elevated plus maze,  
3 grooming, nest building, open field, object location, social interaction, and pre-pulse  
4 inhibition (PPI). All test apparatuses were cleaned using 70% ethanol and water between  
5 trials, and the subsequent test session was started only after the ethanol vapor odors had  
6 disappeared and the apparatuses had dried.

7 The elevated plus maze (EPM-04M, Muromachi, Japan) consisted of two opposing  
8 open arms ( $297 \times 54$  mm) and two closed arms ( $300 \times 60 \times 150$  mm) extending from a  
9 central platform ( $60 \times 60$  mm). The entire apparatus was elevated 400 mm above the floor.  
10 Each mouse was placed on the central platform facing a closed arm and allowed to freely  
11 explore the maze for 10 min. Arm entry was defined as the entry of all four paws into the  
12 arm. The time spent in the open arms over 10 min was recorded as an index of state anxiety.

13 For the self-grooming test, all mice housed in the same home cage were moved into a  
14 new cage for 10 min. Each mouse was then individually placed in a standard mouse home  
15 cage ( $31 \times 16.5 \times 14$  cm) illuminated at ~200 lux. After a 10-min habituation period, each  
16 mouse was scored for cumulative time spent grooming all body regions (56) over 10 min  
17 using a stopwatch. Self-grooming behavior is conserved across species and is indicative of



1 certain pathological conditions or factors. In humans, for example, self-grooming increases  
2 during stressful conditions and in certain psychiatric disorders (56).

3 For the nest building test, 200 g of corncob was spread across the bottom of each cage  
4 for bedding, and a square-shaped piece of cotton was placed in the cage center as raw  
5 material for the nest. Each mouse was individually placed in the cage for 8 h. Photos of the  
6 constructed nest were acquired every 2 h, and the nest building process was evaluated by  
7 measuring the proportion of loose cotton as follows: 1 point for 25% weight (Wt%)  
8 loosened, 2 points for 50 Wt% loosened, 3 points for 75 Wt% loosened, and 4 points for  
9 100 Wt% loosened. After 8 h, we checked the shape of the nest and added 1 point if the  
10 mice had completed a nest with a bird's nest-like shape. The temperature of the room was  
11 maintained at 25°C and illumination at 150–180 lux during nest building. Nest-building  
12 behavior is an indicator of general well-being in mice (57), whereas poor nest building is an  
13 indicator of psychological or physiological abnormalities (58, 59).

14 For the open field (OF) test, each mouse was placed in the center of the apparatus (40 ×  
15 40 × 40 cm; 150–180 lux illumination) and allowed to move freely for 10 min. The  
16 behavior of each mouse was monitored using a charge-coupled device camera mounted on  
17 the ceiling above the OF. The total distance traveled (cm) was measured using CompACT  
18 VAS software (Muromachi).

1 For the object location test (OLT) of working memory (60), mice first explored the  
2 empty OF box, and then, two identical objects A and B (two 500-mL PET bottles filled with  
3 blue-colored water) were placed in two corners 5 cm from the wall. After a 10-min  
4 exploration/learning period, the mice were returned to their home cage for 5 min, and  
5 Object A was moved to a new corner (Object A'). The animals were then placed back in the  
6 OF box and allowed to explore for 5 min. The time spent exploring A' and B were  
7 measured to calculate a discrimination index representing working memory according to the  
8 following equation: Discrimination Index = (Novel Object A' exploration time - Familiar  
9 Object B exploration time) / (Novel Object A' + Familiar Object B exploration times). The  
10 OLT was performed under illumination at 10–15 lux.

11 The social interaction test was conducted as previously described (61) using a  
12 specialized Sociability Apparatus (SC-03M, Muromachi). The time spent sniffing a novel  
13 stimulus mouse or object was manually scored from videos recorded using an overhead  
14 color USB camera (aa000080a02, Iroiro House). Stimulus mice (129Sv/SvJcl strain) age-  
15 and sex-matched to test mice were habituated to the apparatus and to the enclosure cup for  
16 30 min per day for 2 days prior to testing. The location (left or right) of the novel object and  
17 novel mouse within an enclosure were alternated across test subjects. The test mouse was  
18 allowed to acclimate to the apparatus for a total of 20 min before the sociability test—the

1 first 10 min in the central chamber with the doors closed and then 10 min in the empty arena  
2 with the doors open. The test subject was briefly confined to the center chamber while a  
3 novel stimulus mouse in an enclosure cup was placed on one of the side chamber and  
4 another empty enclosure cup (novel object) was placed on the other side of the chamber.  
5 The test subject was allowed to approach the novel object or mouse freely for 10 min. The  
6 time spent interacting with the stimulus mouse versus the novel object was calculated as an  
7 index of sociability.

8 The SR-LAB-Startle Response System (San Diego Instruments) was used to detect  
9 acoustic startle reflexes and PPI. Startle responses were measured using 5 stimulus  
10 intensities (80, 90, 100, 110, and 120 dB) delivered 10 times each for 40 ms over a white  
11 noise background (65 dB). The stimuli were presented in quasi-random order at random  
12 inter-trial intervals (10–20 s). In the PPI session, mice were exposed to 2 stimulus patterns:  
13 1) a startle stimulus alone (120 dB, 40 ms) with no pre-pulse stimulus and 2) a startle  
14 stimulus (120 dB, 40 ms) following a pre-pulse stimulus (70 dB for 20 ms; lead time, 100  
15 ms). Each trial was repeated 10 times in quasi-random order at random inter-trial intervals  
16 (10–20 s). PPI was defined as the percent decline in startle response because of pre-pulse  
17 stimuli according to the following equation:  $100 - [(120 \text{ dB startle amplitude after any}$

1 pre-pulse) / (120 dB startle amplitude only)] × 100. A new accelerometer was used for the  
2 experiments with *Disc1* knockout mice.

3

#### 4 **Immunohistochemistry**

5 Following transcardial perfusion with PBS and 4% paraformaldehyde, entire brains were  
6 collected, post-fixed at 4°C overnight, and cryoprotected in 20% sucrose at 4°C overnight.

7 Serial coronal sections (50 μm) were then cut using a cryostat (CM3050 S; Leica

8 Microsystems). The antigens in the tissues were reactivated by heating in HistoVT One

9 solution (Nacalai Tesque) for 30 min at 70°C using a water bath. Sections were

10 permeabilized with 0.2% Triton X-100 and 1% Block Ace (DS Pharma Biomedical) in PBS

11 for 30 min at room temperature, following which they were incubated overnight with the

12 indicated primary antibodies at room temperature. For immunohistochemistry of

13 postmortem human brain tissues, paraffin blocks including BA9 (a region of frontal cortex)

14 were sliced into 10-μm sections, deparaffinized with xylene, and rehydrated with decreasing

15 concentrations of ethanol in water. Antigens were reactivated by heating in HistoVT One

16 solution for 30 min at 90°C using a water bath. Sections were treated with TrueBlack

17 Lipofuscin Autofluorescence Quencher (Biotium Inc.) for 30 s at room temperature and

18 blocked with 1% Block Ace (DS Pharma Biomedical) in PBS for 30 min at room

1 temperature. Thereafter, the mouse and human brain sections were subjected to the same  
2 immunostaining procedures. The following primary antibodies were diluted in PBS  
3 containing 0.4% Block Ace: goat anti-PV (Frontier Institute, PV-Go-Af860; 1:2000), mouse  
4 anti-ALDH1L1 (Rockland, 600-101-HB6S; 1:200), FITC-conjugated tomato lectin  
5 (VECTOR, FL-1171; 1:200), chick anti-GFP (Abcam, ab13970; 1:500), goat anti-IBA1  
6 (Abcam, ab48004; 1:100), mouse anti-NeuN (Millipore, MAB377; 1:500), rabbit anti-AGE  
7 (Abcam, ab23722; 1:2000), rabbit anti-IBA1 (Wako, WDJ3047; 1:300), rat anti-CD68  
8 (Abcam, ab53444; 1:500), and rabbit anti-fibrin (Dako, A0080, 1:500). Thereafter, sections  
9 were washed three times with PBS containing 0.05% Tween-20, incubated for 2 h with  
10 fluorochrome-conjugated secondary antibodies in PBS containing 0.4% Block Ace, and  
11 washed an additional three times in PBS containing 0.4% Block Ace. For enhanced  
12 horseradish peroxidase (HRP) immunostaining, samples were treated with 3% H<sub>2</sub>O<sub>2</sub> in PBS  
13 for 20 min following the reactivation step to quench endogenous peroxidase activity and  
14 washed in PBS. Sections were incubated with rabbit anti-GLO1 (Novusbio, NBP2-75514,  
15 1:1500) and/or mouse anti-AGE4 (Trans Genic Inc, 14B5, 1:400), followed by incubation  
16 with anti-IgG antibodies conjugated to biotin (Vector, 1:200). After washing as described  
17 for other secondary antibodies, sections were incubated with streptavidin-conjugated HRP  
18 (Jackson ImmunoResearch, 1:200) for 120 min and washed three times with PBS

1 containing 0.05% Tween-20. The TSA Plus Fluorescence System (PerkinElmer) was used  
2 to detect HRP activity. All preparations were counterstained with DAPI (Nacalai Tesque) to  
3 reveal cell nuclei, washed three additional times, mounted in Permaflow (Thermo  
4 Scientific), and observed using a FluoView<sup>®</sup> FV3000 Confocal Laser Scanning Microscope  
5 (Olympus).

6

## 7 **Image analysis**

8 Unless otherwise noted, all image analyses were performed using ImageJ version  
9 2.0.0-rc-59/1.51n, and images were first binarized. PV-positive cells with a threshold  
10 exceeding 30 were counted.

11 To measure the areas immunopositive for AGE, fibrin, and AGE-4, the threshold  
12 settings were applied to ensure that only the correct immunopositive area was properly  
13 selected, and the stained area of the entire screen was measured. For measuring the  
14 fluorescence intensity of GFP and IBA1, after setting the ROI to select only target  
15 immunoreactive cells, the intensity of >5 cells in each image were measured. To count  
16 microglial cells containing a CD68-positive area exceeding  $20 \mu\text{m}^2$ , the threshold was set to  
17 select only the CD68-positive area. Colocalization analysis of two different fluorescence  
18 markers was performed using the Fiji plug-in Coloc 2 with the default settings. We adopted

1 Pearson's R value below the threshold to judge the strength of colocalization:  $R \geq 0.7$ ,  
2 strong;  $0.7 > R \geq 0.4$ , moderate;  $0.4 > R \geq 0.2$ , weak; and  $R < 0.2$ , none or very weak.

3

#### 4 **Immunoblotting**

5 Extracts from mouse hippocampi were homogenized in lysis buffer containing 40 mM Tris  
6 base, 0.4% sodium dodecyl sulfate (SDS), 0.01 M EDTA (pH 8.0), 8 M urea, and 1 mM  
7 phenylmethylsulfonyl fluoride. The total lysate protein content was quantified using a DC  
8 Protein Assay Kit (Bio-Rad). Total protein (30  $\mu$ g per gel lane) was separated using  
9 SDS-PAGE and transferred to PVDF membranes (Millipore). Membranes were blocked  
10 with TBST buffer (137m M NaCl, 2.7 mM KCl, and 25mM Tris, pH 8.0) including 0.2%  
11 Triton X-100 and 5% bovine serum albumin (BSA) for 30 min at room temperature with  
12 slow shaking, followed by incubation overnight with primary antibodies in TBST including  
13 2% BSA at 4°C. The primary antibodies used were rabbit anti-GLO1 (Santa Cruz,  
14 sc-67351; 1:1000), mouse-anti-PV (Swant, PV-235; 1:1000), rabbit anti-glucose transporter  
15 1 (Glut1, Frontier Institute, Af1020; 1:1000) and mouse anti-tubulin (Santa Cruz, sc-32293;  
16 1:10000). After washing three times with TBST, membranes were incubated with the  
17 secondary antibody (HRP-conjugated anti-mouse or anti-rabbit IgG antibody, GE  
18 Healthcare; 1:2000) in TBST plus 2% BSA. After washing three times with TBST, blots

1 were processed for chemiluminescence using standard protocols (ECL Prime Western  
2 Blotting Detection Reagent #RPN2236, GE Healthcare), and signals were detected using a  
3 LAS 4000 Imager (Fuji Film).

4

## 5 **Microdialysis**

6 We used an *in vivo* microdialysis system for the measurement of extracellular dopamine  
7 concentration (62) and collection of brain parenchymal dialysate (Fig.1H, J and fig. S7D).  
8 After anesthesia by intraperitoneal injection of ketamine (80 mg/kg)/xylazine (16 mg/kg),  
9 mice were fixed in a stereotaxic apparatus (Narishige) and a microdialysis guide cannula  
10 (CXG-8, Eicom) was implanted in the medial prefrontal cortex (mPFC; antero-posterior  
11 (AP), +1.8 mm; medio-lateral (ML),  $\pm 0.15$  mm; dorso-ventral (DV), -1.5 mm from  
12 bregma), or nucleus accumbens (NAc) (AP, +1.5 mm; ML,  $\pm 0.6$  mm; DV, -3.5 mm from  
13 bregma). After recovery for at least 10 days, a microdialysis probe (CX-I-8-01 for the  
14 mPFC and CX-I-8-02 for NAc; Eicom) was inserted via the guide cannula. Following  
15 insertion, the probe was connected to a syringe pump and perfusion was performed at 2  $\mu$   
16 L/min for NAc and 0.5  $\mu$ L/min for mPFC using Ringer's solution (147 mM NaCl, 4 mM  
17 KCl, and 2.3 mM CaCl<sub>2</sub>). Dialysate samples were collected every 10 min and automatically  
18 loaded onto an HTEC-500EPS HPLC unit (Eicom). Constant 5-HT concentration in three



1 consecutive collection periods was first confirmed to rule out blood contamination before  
2 initiating the measurements of dopamine concentration or collection of parenchymal  
3 dialysates. Analytes were then separated on an affinity column (PP-ODS III, Eicom), and  
4 compounds were subjected to redox reactions within an electrochemical detection unit  
5 (amperometric DC mode; applied potential range, 450 mV). The resulting chromatograms  
6 were analyzed using an EPC-500 data processor (Eicom), and actual sample concentrations  
7 were computed based on the peak heights obtained using 0.01, 0.1, and 1 pg dopamine in  
8 standard solution (Sigma). The locations of the microdialysis probes were histologically  
9 confirmed.

10 For glucose measurements in Fig. 4H and Fig. 5G, we collected dialysates from the  
11 mPFC for 1 h after 16 h of fasting, followed by 0–1 h after eating 0.05 g of carbohydrates  
12 (starch or sucrose), and 1–2 h after eating 0.05 g of carbohydrates (starch or sucrose).

13

#### 14 **EEG recordings**

15 For behavioral and video/EEG monitoring, mice were anesthetized by an intraperitoneal  
16 injection of ketamine (80 mg/kg)/xylazine (16 mg/kg), fixed in a stereotaxic apparatus  
17 (Narishige, Japan), and implanted with EEG and electromyography (EMG) electrodes. The  
18 EEG electrodes were gold-coated stainless steel screws (SUS303) soldered with lead wires

1 (ANE-0190, Adler's Nest, Japan) implanted epidurally over the left frontal cortex (AP, 1  
2 mm; ML, 1 mm) and the bilateral parietal cortex (AP, -2 mm; ML,  $\pm 2$  mm). All wires  
3 were soldered to a multichannel electrical connector (R833-83-006-001, TOKIWA SHOKO,  
4 Japan). The left parietal cortex electrode was used as a reference for monitoring the frontal  
5 cortex EEG. The EMG electrodes were lead wires placed bilaterally into the trapezius  
6 muscle. Following recovery for at least 10 days, EEG/EMG signals were amplified and  
7 band-pass filtered (EEG: 1.5–1000 Hz; EGM: 15–3000 Hz) using a MEG-6116 system  
8 (NIHON KOHDEN), digitized at a sampling rate of 200 Hz, recorded using a data  
9 acquisition system (PowerLab 8/30, ADInstruments), and analyzed using LabChart  
10 Software (ADInstruments). Behavioral activities were recorded using a USB camera  
11 (aa000080a02, Iroiro House, Japan). Behavioral and electrophysiological responses to a  
12 novel object (an empty 100 mL DURAN bin) were recorded in an OF chamber (20 × 20 ×  
13 26 cm). The novel object was placed in one corner of the OF chamber to induce exploration.  
14 The 30 s preceding the first contact with the novel object was analyzed for object  
15 recognition ("object activity"). For EEG monitoring in the home cage, mice were first  
16 habituated for 8 h. Home cage EEG data were then acquired for 2 min after awaking as  
17 confirmed by clear EMG signals and movement images from an offline video camera  
18 analysis ("home cage activity"). All recordings were converted into power spectra using a

1 fast Fourier transform (FFT) algorithm with a 5-s Hann cosine-bell window and 50%  
2 overlap between successive window measurements. All FFTs were maintained at 1024  
3 points to obtain 0.512 Hz resolution. The total signal amplitude or power ( $V^2$ ) in each 5-s  
4 period was measured as the power magnitude at each frequency. The mean of the grouped  
5 power spectra was calculated over the following frequency ranges: 1–4 Hz (delta), 5–10 Hz  
6 (theta), 30–45 Hz (low gamma), and 55–80 Hz (high gamma). The power values detected at  
7 each frequency range for 30 s were further averaged over 30 s of total EEG power using the  
8 mean values to remove potential noise. These analyses were performed using custom  
9 software written in MATLAB (R2019b; MathWorks).

10

## 11 **Transcriptome analysis**

12 Three independent total RNA samples from each group were mixed and purified using a  
13 RNeasy Mini Kit (Qiagen). RNA quality was assessed using a 2100 bioanalyzer (Agilent  
14 Technologies). Cy3-labeled cRNA was prepared using a Low Input Quick Amp Labeling  
15 Kit (Agilent Technologies), in accordance with the manufacturer's protocol. Samples were  
16 hybridized to the SurePrint G3 Mouse Gene Expression v2 Microarray (G4852B; Agilent  
17 Technologies). Thereafter, the array was washed and scanned using the SureScan  
18 Microarray Scanner (Agilent Technologies). Microarray images were analyzed using the

1 Feature Extraction software with default settings for all parameters (Agilent Technologies).  
2 Data from each microarray analysis were normalized by shift to the 75<sup>th</sup> percentile without  
3 baseline transformation. Microarray results were deposited in the Gene Expression  
4 Omnibus database under the accession number GSE141829.

5

#### 6 **Insulin and glucose measurements**

7 Blood plasma was collected from the mouse cheek as described by Golde (63). Plasma  
8 glucose concentration was measured using a Precision-Neo blood glucose meter (#71386-80,  
9 Abbott Japan), plasma insulin concentration using an ELISA kit (#M1102, MORINAGA),  
10 and glucose concentration in the dialysate samples using a different ELISA kit (#ab65333,  
11 Abcam), all according to the manufacturers' instructions. Data were collected on a  
12 microplate reader (Varioskan, Thermo Fisher Scientific).

13

#### 14 **Human postmortem brain tissue collection**

15 Postmortem brain tissues from patients with SZ and BD were obtained from the Fukushima  
16 Brain Bank at the Department of Neuropsychiatry, Fukushima Medical University.  
17 Postmortem brain tissues from control individuals were obtained from the Section of  
18 Pathology, Fukushima Medical University Hospital. The use of postmortem human brain

1 tissues in the present study was approved by the Ethics Committee of Fukushima Medical  
2 University (No.1685) and Tokyo Metropolitan Institute of Medical Science (No. 18-20) and  
3 complied with the Declaration of Helsinki and its later amendments. All procedures were  
4 conducted with the informed written consent of the next of kin. Detailed demographic  
5 information of the 10 patients with SZ, 9 patients with BD, and the 12 age- and sex-matched  
6 control individuals is provided in Supplementary Table 3. No between-group differences  
7 were observed in terms of sex (Fisher's exact test, Ctrl and SZ:  $p = 1.00$ , Ctrl and BD:  $p =$   
8  $0.40$ ), age (Student's t-test, Ctrl and SZ:  $p = 0.69$ , Welch's t-test, Ctrl and BD:  $p = 0.66$ ),  
9 postmortem interval (Student's t-test, Ctrl and SZ:  $p = 0.89$ , Ctrl and BD:  $p = 0.98$ ), or a  
10 history of diabetes mellitus (Fisher's exact test, Ctrl and SZ:  $p = 0.59$ , Ctrl and BD:  $p =$   
11  $0.59$ ). Each patient with SZ and BD fulfilled the diagnostic criteria established by the  
12 American Psychiatric Association (Diagnostic and Statistical Manual of Mental Disorders,  
13 DSM-IV) and did not have a past history of other neurological disorders or substance abuse.  
14 Moreover, none of the control individuals had any record of mental disorders, neurological  
15 disorders, or substance abuse.

16

17 **ROS detection**

1 DHE is oxidized by superoxide and other reactive species to produce a precipitate that emits  
2 red fluorescence, whose intensity can be used to measure the degree of cellular oxidative  
3 stress. Animals were quickly perfused with ice-cold phosphate-buffered salts (PBS), and the  
4 decapitated brains were embedded in OCT compound (Sakura Finetek Japan), and 10  $\mu\text{m}$   
5 thick coronal sections were prepared in a cryostat. These sections were incubated with  
6 phosphate buffer containing 100  $\mu\text{M}$  diethylene triamine pentaacetic acid (PB/DTPA) for 10  
7 min, and then incubated with PB/DTPA containing 10  $\mu\text{M}$  DHE (Invitrogen) for 20 min.  
8 After washing with PB/DTPA twice, sections were fixed with 4% PFA for 15 min. Once  
9 washed with PBS, PBS containing 1  $\mu\text{M}$  TO-PRO 3 (Thermo Scientific) was applied to  
10 each section followed by 3 washes with PBS. Then, sections were sealed with Permaflow  
11 (Thermo Scientific) and observed using a FluoView® FV3000 Confocal Laser Scanning  
12 Microscope (Olympus). For DHE detection, we used the following filter set: excitation 405  
13 nm, emission 600–650 nm.

14

## 15 **Statistical analyses**

16 Statistical differences among  $\geq 4$  groups were determined using one-way analysis of variance  
17 (ANOVA), two-way ANOVA, three-way ANOVA, or repeated measures ANOVA, followed  
18 by the Bonferroni multiple comparison test or Tukey-Kramer test as a post hoc test, as

1 summarized in Supplementary Table 5. We used the same animals for all results coming from  
2 Starch +/+ and Suc *Glo1*/+ groups according to the 3R rule. Data were collected at the same  
3 time regardless of whether the drug was administered or not. The number of animals  
4 employed for each experiment/analysis can be found in each figure legend. Detailed  
5 descriptions of statistical analyses in Fig. 1H, J, and 4H are shown below. In Figure 1H, post  
6 hoc Dunnett's multiple comparisons test for groups was performed at specific time points (0  
7 min and 40 min),  $^{###}p < 0.001$  for Suc *Glo1*/+ vs. Ctrl (Starch +/+),  $^{\$}p < 0.05$  for Starch *Glo1*/+  
8 vs. Ctrl (Starch +/+). In Fig. 1J, post hoc Bonferroni's multiple comparisons test for groups  
9 was performed at specific time points (0 min and 40 min),  $^{###}p < 0.001$  for Suc *Glo1*/+ vs.  
10 Starch +/+,  $^{$$$}p < 0.001$  for Suc *Glo1*/+ vs. Starch +/+ Aripiprazole,  $^{\&\&\&}p < 0.001$  for Suc *Glo1*/+ vs.  
11 Suc *Glo1*/+ Aripiprazole. In Fig. 4H, post hoc Dunnett's multiple comparisons test for groups was  
12 performed at each time point,  $^{###}p < 0.001$ ,  $^{##}p < 0.01$  for Suc *Glo1*/+ vs. Ctrl (Starch +/+).

13

#### 14 **Supplementary Figure Legends**

15 **Supplementary Figure 1. Characterization of regional GLO1 expression in WT and**  
16 **heterozygous *Glo1* mutant mice fed starch or sucrose.**

17 (A) Western blot analysis of GLO1 protein expression using tubulin as internal control. The  
18 cerebral cortex, including the hippocampus, was used as loading sample. (B) Densitometric

1 analysis of GLO1 protein expression (n = 3 or 4 mice per group). To quantify expression,  
2 GLO1 band intensities in (A) were divided by the intensities of the corresponding tubulin  
3 bands. (C) Body weight trajectories. No significant differences were observed among  
4 groups (n = 6–10 mice per group). (D, E) Measurement of aripiprazole- or  
5 aspirin-containing water consumption per day to estimate drug intake (n = 4 mice per  
6 group). Student's *t*-test was used for statistical analysis. All data are presented as mean ±  
7 SEM. \*\**p* < 0.01, \**p* < 0.05

8

9 **Supplementary Figure 2. Analyses of psychiatric disease-related phenotypes in *Glo1***  
10 **heterozygotic mice.**

11 (A, B) Behavioral analyses in the four groups of mice (n = 18–23 mice per group). (A)  
12 Elevated plus maze test to evaluate anxiety. (B) Preference for novel mouse in the  
13 three-chamber test, calculated as [(time spent exploring novel mouse)/(total time spent  
14 exploring novel mouse and novel object)] × 100%. (C) Extracellular dopamine  
15 concentration in the medial prefrontal cortex measured at 20-min intervals using an *in vivo*  
16 microdialysis system (n = 7–10 mice per group). (D–I) Effect of aripiprazole treatment on  
17 behavioral phenotypes (n = 12–18 mice per group). (D) Effects of aripiprazole treatment on  
18 the acoustic startle response, (E) pre-pulse inhibition (PPI) using a 70-dB pre-pulse, (F) object



1 location test, (G) self-grooming, (H) elevated plus maze performance, and (I) nest-building  
2 skill. In (I), post hoc Tukey's multiple comparisons test of groups at specific time points, <sup>###</sup>*p*  
3 < 0.001, <sup>#</sup>*p* < 0.05 for Starch +/+ vs. Suc *Glo1*/+ Aripri, <sup>\$\$</sup>*p* < 0.01 for Starch +/+ Aripri vs. Suc  
4 *Glo1*/+ Aripri, <sup>\$\$\$</sup>*p* < 0.001 for Starch +/+ vs. Suc *Glo1*/+, \**p* < 0.05 for Starch +/+ Aripri vs.  
5 Suc *Glo1*/+. All data are presented as mean ± SEM. \*\*\**p* < 0.001, \*\**p* < 0.01, \**p* < 0.05

6

### 7 **Supplementary Figure 3. Analyses of psychiatric disease-related phenotypes in *Disc1***

8 **heterozygotic mice.**

9 (A-E) Behavioral analyses in the four groups of mice (n = 8–11 mice per group). (A)

10 Spontaneous locomotor activity in the open-field test. (B) Acoustic startle responses. (C)

11 Pre-pulse inhibition (PPI) using a 70 dB pre-pulse. (D) Object location test. (E) Preference for

12 novel mouse in the three-chamber test, calculated as fig. S2B. All data are presented as mean

13 ± SEM. \*\*\**p* < 0.001

14

### 15 **Supplementary Figure 4. GLO1 cellular localization in the prefrontal cortex of**

16 **sucrose-fed wild-type mice.**

17 (A-F) GLO1 localization in astrocytes. (A) GLO1 co-immunostaining with an astrocyte

18 marker (ALDH1L1) or an endothelial cell marker (tomato lectin). (B) Merged

1 GLO1/ALDH1L1 image from (A). Yellow arrows in (B) indicate cells with  
2 GLO1/ALDH1L1 colocalization. (C) Merged GLO1/lectin image from (A). White arrows  
3 denote representative GLO1-positive cells close to endothelial cells. (D, E) High  
4 magnification images of GLO1 co-immunostaining with ALDH1L1 or with tomato lectin.  
5 (E) Merged GLO1/ALDH1L1 image from (D). (F) 2D intensity histogram of the two  
6 indicated channels to identify GLO1 colocalization with ALDH1L1 or tomato lectin,  
7 interpreting the strength of a relationship based on R as follows:  $R \geq 0.7$ , strong;  $0.7 > R \geq$   
8  $0.4$ , moderate;  $0.4 > R \geq 0.2$ , weak; and  $R < 0.2$ , none or very weak. (G) Average R-value  
9 of colocalization data including (F) from three different locations of three mice. (H) GLO1  
10 co-immunostaining with the neuronal marker NeuN and the microglial marker IBA1. (I)  
11 Merged GLO1/NeuN image from (H). Yellow arrows indicate neurons with mild GLO1  
12 immunoreactivity. (J) Merged GLO1/IBA1 image from (H). (K) GLO1 immunostaining  
13 and DAPI staining in *Glo1* homozygous mice.

14

15 **Supplementary Figure 5. Fructose-derived AGE4 accumulation in microglia of**  
16 **sucrose-fed mice.**

17 (A, B) Immunohistochemical images of the microglial marker IBA1 and AGE4 in the  
18 medial prefrontal cortex region (mPFC). (C) Merged AGE4/IBA1 image. (D) High

1 magnification images of AGE4 co-immunostaining with IBA1. (E) Measurement of the  
2 area of AGE-4 immunoexpression in (B). The mean AGE4-immunopositive area intensity  
3 of the entire image was measured in each section (n = 4 mice per group). (F) Mean IBA1  
4 fluorescence intensities of five randomly selected cells per image in four independent mice.  
5 (G) Immunohistological images of IBA1- and CD68-positive microglia in the mPFC region.  
6 White arrows in (G) indicate microglial cells containing CD68-positive areas  $>20 \mu\text{m}^2$ . (H)  
7 Percentage of CD68-positive cells per total microglial cells in each image in (G). All data  
8 are presented as mean  $\pm$  SEM.  $***p < 0.001$ ,  $**p < 0.01$

9

#### 10 **Supplementary Figure 6. Blood vessels Characterization in the four groups.**

11 (A) Western blot analysis of glucose transporter 1 (Glut1) protein expression using tubulin  
12 as internal control. The cerebral cortex, including the hippocampus, was used as loading  
13 sample. (B) Densitometric analysis of Glut1 protein expression (n = 3 mice per group). To  
14 quantify expression, Glut1 band intensities in (A) were divided by the intensities of the  
15 corresponding tubulin bands. (C) Measurement of capillary diameter. Vessels  $<10 \mu\text{m}$  in  
16 diameter were defined as capillaries, and the mean diameter of 10 randomly selected  
17 capillaries per image measured in Fig. 4C (n = 3 mice per group). All data are presented as  
18 mean  $\pm$  SEM.

1

2 **Supplementary Figure 7. Protective effects of aspirin against the development of**

3 **psychiatric phenotypes in G × E mice.**

4 (A–C) Effects of aspirin treatment on the acoustic startle response (A), nest-building skill

5 (B), elevated plus maze test performance (C) and dopamine concentration (D). (E)

6 Parvalbumin (PV) Immunohistochemistry in the medial prefrontal cortex (mPFC). (F)

7 Number of PV-positive cells in the mPFC (n = 4 mice per group). (G) Immunohistological

8 images of GFP-positive astrocytes and ALDH1L1 in the mPFC region. (H) Percentage of

9 GFP-positive cells per total ALDH1L1-positive cells in each image in (G). (I) Mean

10 fluorescence GFP intensities of 10 randomly selected cells per image in (G) (from four

11 independent mice). In (B), post hoc Tukey's multiple comparisons test of groups at specific

12 time points,  $^{###}p < 0.001$ ,  $^{##}p < 0.01$  for Starch +/+ vs. Suc *Glo1*/+ Aspi,  $^{$$}p < 0.01$ ,  $^{$}p <$

13  $0.05$  for Starch +/+ Aspi vs. Suc *Glo1*/+ Aspi. In (D), post hoc Bonferroni's multiple

14 comparisons test of groups at specific time points (0 min and 40 min),  $^{###}p < 0.001$  for Suc

15 *Glo1*/+ vs. Starch +/+,  $^{$$$}p < 0.001$  for Suc *Glo1*/+ vs. Starch +/+ Aspi,  $^{&&&}p < 0.001$  for

16 Suc *Glo1*/+ Aspi vs. Starch +/+,  $^{††}p < 0.01$  for Suc *Glo1*/+ Aspi vs. Suc *Glo1*/+,  $^{‡‡}p < 0.01$

17 for Suc *Glo1*/+ Aspi vs. Starch +/+ Aspi. All data are presented as mean ± SEM.  $^{***}p <$

18  $0.001$ ,  $^{**}p < 0.01$ ,  $^{*}p < 0.05$

1

## 2 **Supplementary Figure 8. ROS detection in the four groups.**

3 (A) Reactive oxygen species (ROS) detection with *dihydroethidium* (DHE). (B) Merged  
4 DHE/Nucleus (TO-PRO 3) image. All cells are DHE positive, according to nucleus images.  
5 (C) ROS detection images without DHE. (D) Fluorescent intensity of DHE positive cells in  
6 (A). The mean DHE fluorescent intensity of each cell was measured in each section (n = 4  
7 mice per group). All data are presented as mean  $\pm$  SEM.

8

## 9 **References**

- 10 1. *Sugar Intake for adults and children* (2015).
- 11 2. N. Fidler Mis, C. Braegger, J. Bronsky, C. Campoy, M. Domellöf, N. D.  
12 Embleton, I. Hojsak, J. Hulst, F. Indrio, A. Lapillonne, W. Mihatsch, C.  
13 Molgaard, R. Vora, M. Fewtrell, Sugar in Infants, Children and  
14 Adolescents: A Position Paper of the European Society for Paediatric  
15 Gastroenterology, Hepatology and Nutrition Committee on Nutrition. *J*  
16 *Pediatr Gastroenterol Nutr* **65**, 681-696 (2017).
- 17 3. M. Peet, International variations in the outcome of schizophrenia and the  
18 prevalence of depression in relation to national dietary practices: an  
19 ecological analysis. *Br J Psychiatry* **184**, 404-408 (2004).
- 20 4. J. C. Ratliff, L. B. Palmese, E. L. Reutenauer, E. Liskov, C. M. Grilo, C.  
21 Tek, The effect of dietary and physical activity pattern on metabolic  
22 profile in individuals with schizophrenia: a cross-sectional study. *Compr*  
23 *Psychiatry* **53**, 1028-1033 (2012).
- 24 5. J. L. Elmslie, J. I. Mann, J. T. Silverstone, S. M. Williams, S. E. Romans,  
25 Determinants of overweight and obesity in patients with bipolar disorder.  
26 *J Clin Psychiatry* **62**, 486-491; quiz 492-483 (2001).

- 1 6. L. Lien, N. Lien, S. Heyerdahl, M. Thoresen, E. Bjertness, Consumption of  
2 soft drinks and hyperactivity, mental distress, and conduct problems  
3 among adolescents in Oslo, Norway. *Am J Public Health* **96**, 1815-1820  
4 (2006).
- 5 7. K. Byun, Y. Yoo, M. Son, J. Lee, G. B. Jeong, Y. M. Park, G. H. Salekdeh,  
6 B. Lee, Advanced glycation end-products produced systemically and by  
7 macrophages: A common contributor to inflammation and degenerative  
8 diseases. *Pharmacol Ther* **177**, 44-55 (2017).
- 9 8. B. K. Bitanhirwe, T. U. Woo, Oxidative stress in schizophrenia: an  
10 integrated approach. *Neurosci Biobehav Rev* **35**, 878-893 (2011).
- 11 9. L. G. Nucifora, T. Tanaka, L. N. Hayes, M. Kim, B. J. Lee, T. Matsuda, F.  
12 C. Nucifora, Jr., T. Sedlak, R. Mojtabei, W. Eaton, A. Sawa, Reduction of  
13 plasma glutathione in psychosis associated with schizophrenia and  
14 bipolar disorder in translational psychiatry. *Transl Psychiatry* **7**, e1215  
15 (2017).
- 16 10. D. W. Volk, A. Chitrapu, J. R. Edelson, K. M. Roman, A. E. Moroco, D. A.  
17 Lewis, Molecular mechanisms and timing of cortical immune activation in  
18 schizophrenia. *Am J Psychiatry* **172**, 1112-1121 (2015).
- 19 11. H. Q. Cai, V. S. Catts, M. J. Webster, C. Galletly, D. Liu, M. O'Donnell, T.  
20 W. Weickert, C. S. Weickert, Increased macrophages and changed brain  
21 endothelial cell gene expression in the frontal cortex of people with  
22 schizophrenia displaying inflammation. *Mol Psychiatry* **25**, 761-775  
23 (2020).
- 24 12. P. J. Thornalley, Glutathione-dependent detoxification of  
25 alpha-oxoaldehydes by the glyoxalase system: involvement in disease  
26 mechanisms and antiproliferative activity of glyoxalase I inhibitors. *Chem*  
27 *Biol Interact* **111-112**, 137-151 (1998).
- 28 13. M. Fujimoto, S. Uchida, T. Watanuki, Y. Wakabayashi, K. Otsuki, T.  
29 Matsubara, M. Suetsugi, H. Funato, Y. Watanabe, Reduced expression of  
30 glyoxalase-1 mRNA in mood disorder patients. *Neurosci Lett* **438**, 196-199  
31 (2008).
- 32 14. M. Miyashita, M. Arai, A. Kobori, T. Ichikawa, K. Toriumi, K. Niizato, K.  
33 Oshima, Y. Okazaki, T. Yoshikawa, N. Amano, T. Miyata, M. Itokawa,  
34 Clinical features of schizophrenia with enhanced carbonyl stress.  
35 *Schizophr Bull* **40**, 1040-1046 (2014).

- 1 15. M. Toyosima, M. Maekawa, T. Toyota, Y. Iwayama, M. Arai, T. Ichikawa,  
2 M. Miyashita, T. Arinami, M. Itokawa, T. Yoshikawa, Schizophrenia with  
3 the 22q11.2 deletion and additional genetic defects: case history. *Br J*  
4 *Psychiatry* **199**, 245-246 (2011).
- 5 16. N. Shahani, S. Seshadri, H. Jaaro-Peled, K. Ishizuka, Y. Hirota-Tsuyada,  
6 Q. Wang, M. Koga, T. W. Sedlak, C. Korth, N. J. Brandon, A. Kamiya, S.  
7 Subramaniam, T. Tomoda, A. Sawa, DISC1 regulates trafficking and  
8 processing of APP and A $\beta$  generation. *Mol Psychiatry* **20**, 874-879 (2015).
- 9 17. T. Tomoda, A. Sumitomo, H. Jaaro-Peled, A. Sawa, Utility and validity of  
10 DISC1 mouse models in biological psychiatry. *Neuroscience* **321**, 99-107  
11 (2016).
- 12 18. O. D. Howes, A. J. Montgomery, M. C. Asselin, R. M. Murray, P. M.  
13 Grasby, P. K. McGuire, Molecular imaging studies of the striatal  
14 dopaminergic system in psychosis and predictions for the prodromal  
15 phase of psychosis. *Br J Psychiatry Suppl* **51**, s13-18 (2007).
- 16 19. M. Laruelle, A. Abi-Dargham, C. H. van Dyck, R. Gil, C. D. D'Souza, J.  
17 Erdos, E. McCance, W. Rosenblatt, C. Fingado, S. S. Zoghbi, R. M.  
18 Baldwin, J. P. Seibyl, J. H. Krystal, D. S. Charney, R. B. Innis, Single  
19 photon emission computerized tomography imaging of  
20 amphetamine-induced dopamine release in drug-free schizophrenic  
21 subjects. *Proc Natl Acad Sci USA* **93**, 9235-9240 (1996).
- 22 20. G. Winterer, D. R. Weinberger, Genes, dopamine and cortical  
23 signal-to-noise ratio in schizophrenia. *Trends Neurosci* **27**, 683-690  
24 (2004).
- 25 21. A. de Bartolomeis, C. Tomasetti, F. Iasevoli, Update on the Mechanism of  
26 Action of Aripiprazole: Translational Insights into Antipsychotic  
27 Strategies Beyond Dopamine Receptor Antagonism. *CNS Drugs* **29**,  
28 773-799 (2015).
- 29 22. C. L. Beasley, G. P. Reynolds, Parvalbumin-immunoreactive neurons are  
30 reduced in the prefrontal cortex of schizophrenics. *Schizophr Res* **24**,  
31 349-355 (1997).
- 32 23. T. Hashimoto, D. W. Volk, S. M. Eggan, K. Mirnics, J. N. Pierri, Z. Sun, A.  
33 R. Sampson, D. A. Lewis, Gene expression deficits in a subclass of GABA  
34 neurons in the prefrontal cortex of subjects with schizophrenia. *J Neurosci*  
35 **23**, 6315-6326 (2003).

- 1 24. M. Thompson, C. S. Weickert, E. Wyatt, M. J. Webster, Decreased  
2 glutamic acid decarboxylase(67) mRNA expression in multiple brain areas  
3 of patients with schizophrenia and mood disorders. *J Psychiatr Res* **43**,  
4 970-977 (2009).
- 5 25. A. Mukherjee, F. Carvalho, S. Eliez, P. Caroni, Long-Lasting Rescue of  
6 Network and Cognitive Dysfunction in a Genetic Schizophrenia Model.  
7 *Cell* **178**, 1387-1402.e1314 (2019).
- 8 26. R. Nguyen, Investigating the Roles of Parvalbumin and Cholecystokinin  
9 Interneurons of the Ventral Hippocampus and Medial Prefrontal Cortex  
10 in Schizophrenia-Related Behaviours. (2018).
- 11 27. M. I. Atagun, Brain oscillations in bipolar disorder and lithium-induced  
12 changes. *Neuropsychiatr Dis Treat* **12**, 589-601 (2016).
- 13 28. P. J. Uhlhaas, W. Singer, Abnormal neural oscillations and synchrony in  
14 schizophrenia. *Nat Rev Neurosci* **11**, 100-113 (2010).
- 15 29. A. R. Bialas, J. Presumey, A. Das, C. E. van der Poel, P. H. Lapchak, L.  
16 Mesin, G. Victora, G. C. Tsokos, C. Mawrin, R. Herbst, M. C. Carroll,  
17 Microglia-dependent synapse loss in type I interferon-mediated lupus.  
18 *Nature* **546**, 539-543 (2017).
- 19 30. K. E. Linker, M. G. Elabd, P. Tawadrous, M. Cano, K. N. Green, M. A.  
20 Wood, F. M. Leslie, Microglial activation increases cocaine  
21 self-administration following adolescent nicotine exposure. *Nat Commun*  
22 **11**, 306 (2020).
- 23 31. R. Suzuki, S. Arata, S. Nakajo, K. Ikenaka, S. Kikuyama, S. Shioda,  
24 Expression of the receptor for pituitary adenylate cyclase-activating  
25 polypeptide (PAC1-R) in reactive astrocytes. *Brain Res Mol Brain Res*  
26 **115**, 10-20 (2003).
- 27 32. R. Suzuki, J. Watanabe, S. Arata, H. Funahashi, S. Kikuyama, S. Shioda,  
28 A transgenic mouse model for the detailed morphological study of  
29 astrocytes. *Neurosci Res* **47**, 451-454 (2003).
- 30 33. M. P. Wautier, O. Chappey, S. Corda, D. M. Stern, A. M. Schmidt, J. L.  
31 Wautier, Activation of NADPH oxidase by AGE links oxidant stress to  
32 altered gene expression via RAGE. *Am J Physiol Endocrinol Metab* **280**,  
33 E685-694 (2001).
- 34 34. A. Das, G. C. t. Wallace, C. Holmes, M. L. McDowell, J. A. Smith, J. D.  
35 Marshall, L. Bonilha, J. C. Edwards, S. S. Glazier, S. K. Ray, N. L. Banik,  
36 Hippocampal tissue of patients with refractory temporal lobe epilepsy is



- 1 associated with astrocyte activation, inflammation, and altered  
2 expression of channels and receptors. *Neuroscience* **220**, 237-246 (2012).
- 3 35. D. D. Mao, W. Y. Yang, Y. Li, J. W. Lin, S. Y. Gao, Y. R. Wang, H. Y. Hu,  
4 Effect of Qingxin Kaiqiao Fang on Hippocampus mRNA Expression of the  
5 Inflammation-Related Genes IL-1beta, GFAP, and Abeta in an  
6 Alzheimer's Disease Rat Model. *Evid Based Complement Alternat Med*  
7 **2018**, 9267653 (2018).
- 8 36. C. García-Cáceres, C. Quarta, L. Varela, Y. Gao, T. Gruber, B. Legutko, M.  
9 Jastroch, P. Johansson, J. Ninkovic, C. X. Yi, O. Le Thuc, K. Szigeti-Buck,  
10 W. Cai, C. W. Meyer, P. T. Pfluger, A. M. Fernandez, S. Luquet, S. C.  
11 Woods, I. Torres-Alemán, C. R. Kahn, M. Götz, T. L. Horvath, M. H.  
12 Tschöp, Astrocytic Insulin Signaling Couples Brain Glucose Uptake with  
13 Nutrient Availability. *Cell* **166**, 867-880 (2016).
- 14 37. J. P. Luyendyk, J. G. Schoenecker, M. J. Flick, The multifaceted role of  
15 fibrinogen in tissue injury and inflammation. *Blood* **133**, 511-520 (2019).
- 16 38. J. Paul, S. Strickland, J. P. Melchor, Fibrin deposition accelerates  
17 neurovascular damage and neuroinflammation in mouse models of  
18 Alzheimer's disease. *J Exp Med* **204**, 1999-2008 (2007).
- 19 39. M. Nitta, T. Kishimoto, N. Muller, M. Weiser, M. Davidson, J. M. Kane, C.  
20 U. Correll, Adjunctive use of nonsteroidal anti-inflammatory drugs for  
21 schizophrenia: a meta-analytic investigation of randomized controlled  
22 trials. *Schizophr Bull* **39**, 1230-1241 (2013).
- 23 40. J. Savitz, S. Preskorn, T. K. Teague, D. Drevets, W. Yates, W. Drevets,  
24 Minocycline and aspirin in the treatment of bipolar depression: a protocol  
25 for a proof-of-concept, randomised, double-blind, placebo-controlled, 2x2  
26 clinical trial. *BMJ Open* **2**, e000643 (2012).
- 27 41. G. de Gaetano, Low-dose aspirin and vitamin E in people at  
28 cardiovascular risk: a randomised trial in general practice. Collaborative  
29 Group of the Primary Prevention Project. *Lancet* **357**, 89-95 (2001).
- 30 42. E. Magen, J. R. Viskoper, J. Mishal, R. Priluk, D. London, C. Yosefy,  
31 Effects of low-dose aspirin on blood pressure and endothelial function of  
32 treated hypertensive hypercholesterolaemic subjects. *J Hum Hypertens*  
33 **19**, 667-673 (2005).
- 34 43. M. Cortes-Canteli, D. Zamolodchikov, H. J. Ahn, S. Strickland, E. H.  
35 Norris, Fibrinogen and altered hemostasis in Alzheimer's disease. *J*  
36 *Alzheimers Dis* **32**, 599-608 (2012).

- 1 44. A. Ciobica, M. Padurariu, I. Dobrin, C. Stefanescu, R. Dobrin, Oxidative  
2 stress in schizophrenia - focusing on the main markers. *Psychiatr Danub*  
3 **23**, 237-245 (2011).
- 4 45. E. Kim, Z. Keskey, M. Kang, C. Kitchen, W. E. Bentley, S. Chen, D. L.  
5 Kelly, G. F. Payne, Validation of oxidative stress assay for schizophrenia.  
6 *Schizophr Res* **212**, 126-133 (2019).
- 7 46. B. Rudy, C. J. McBain, Kv3 channels: voltage-gated K<sup>+</sup> channels designed  
8 for high-frequency repetitive firing. *Trends Neurosci* **24**, 517-526 (2001).
- 9 47. O. Kann, The interneuron energy hypothesis: Implications for brain  
10 disease. *Neurobiol Dis* **90**, 75-85 (2016).
- 11 48. F. Donato, S. B. Rompani, P. Caroni, Parvalbumin-expressing basket-cell  
12 network plasticity induced by experience regulates adult learning. *Nature*  
13 **504**, 272-276 (2013).
- 14 49. T. R. Insel, Rethinking schizophrenia. *Nature* **468**, 187-193 (2010).
- 15 50. C. Menard, M. L. Pfau, G. E. Hodes, V. Kana, V. X. Wang, S. Bouchard, A.  
16 Takahashi, M. E. Flanigan, H. Aleyasin, K. B. LeClair, W. G. Janssen, B.  
17 Labonté, E. M. Parise, Z. S. Lorsch, S. A. Golden, M. Heshmati, C.  
18 Tamminga, G. Turecki, M. Campbell, Z. A. Fayad, C. Y. Tang, M. Merad,  
19 S. J. Russo, Social stress induces neurovascular pathology promoting  
20 depression. *Nat Neurosci* **20**, 1752-1760 (2017).
- 21 51. W. A. Banks, A. M. Gray, M. A. Erickson, T. S. Salameh, M.  
22 Damodarasamy, N. Sheibani, J. S. Meabon, E. E. Wing, Y. Morofuji, D. G.  
23 Cook, M. J. Reed, Lipopolysaccharide-induced blood-brain barrier  
24 disruption: roles of cyclooxygenase, oxidative stress, neuroinflammation,  
25 and elements of the neurovascular unit. *J Neuroinflammation* **12**, 223  
26 (2015).
- 27 52. D. Ben-Nathan, S. Lustig, H. D. Danenberg, Stress-induced  
28 neuroinvasiveness of a neurovirulent noninvasive Sindbis virus in cold or  
29 isolation subjected mice. *Life Sci* **48**, 1493-1500 (1991).
- 30 53. D. Koshiyama, M. Fukunaga, N. Okada, K. Morita, K. Nemoto, K. Usui,  
31 H. Yamamori, Y. Yasuda, M. Fujimoto, N. Kudo, H. Azechi, Y. Watanabe,  
32 N. Hashimoto, H. Narita, I. Kusumi, K. Ohi, T. Shimada, Y. Kataoka, M.  
33 Yamamoto, N. Ozaki, G. Okada, Y. Okamoto, K. Harada, K. Matsuo, H.  
34 Yamasue, O. Abe, R. Hashimoto, T. Takahashi, T. Hori, M. Nakataki, T.  
35 Onitsuka, L. Holleran, N. Jahanshad, T. G. M. van Erp, J. Turner, G.  
36 Donohoe, P. M. Thompson, K. Kasai, R. Hashimoto, White matter

- 1 microstructural alterations across four major psychiatric disorders:  
2 mega-analysis study in 2937 individuals. *Mol Psychiatry*, (2019).
- 3 54. S. Koike, K. Toriumi, S. Kasahara, Y. Kibune, Y. I. Ishida, T. Dan, T.  
4 Miyata, M. Arai, Y. Ogasawara, Accumulation of Carbonyl Proteins in the  
5 Brain of Mouse Model for Methylglyoxal Detoxification Deficits.  
6 *Antioxidants (Basel)* 10, (2021).
- 7 55. K. Toriumi, S. Berto, S. Koike, N. Usui, T. Dan, K. Suzuki, M. Miyashita,  
8 Y. Horiuchi, A. Yoshikawa, M. Asakura, K. Nagahama, H.-C. Lin, Y.  
9 Sugaya, T. Watanabe, M. Kano, Y. Ogasawara, T. Miyata, M. Itokawa, G.  
10 Konopka, M. Arai, Combined glyoxalase 1 dysfunction and vitamin B6  
11 deficiency in a schizophrenia model system causes mitochondrial  
12 dysfunction in the prefrontal cortex. *Redox Biology* 45, 102057 (2021).
- 13 56. A. V. Kalueff, A. M. Stewart, C. Song, K. C. Berridge, A. M. Graybiel, J. C.  
14 Fentress, Neurobiology of rodent self-grooming and its value for  
15 translational neuroscience. *Nat Rev Neurosci* 17, 45-59 (2016).
- 16 57. P. Jirkof, Burrowing and nest building behavior as indicators of  
17 well-being in mice. *J Neurosci Methods* 234, 139-146 (2014).
- 18 58. C. S. Pedersen, D. B. Sorensen, A. I. Parachikova, N. Plath, PCP-induced  
19 deficits in murine nest building activity: employment of an ethological  
20 rodent behavior to mimic negative-like symptoms of schizophrenia. *Behav*  
21 *Brain Res* 273, 63-72 (2014).
- 22 59. A. Forsingdal, K. Fejgin, V. Nielsen, T. Werge, J. Nielsen, 15q13.3  
23 homozygous knockout mouse model display epilepsy-, autism- and  
24 schizophrenia-related phenotypes. *Transl Psychiatry* 6, e860 (2016).
- 25 60. A. Ennaceur, J. Delacour, A new one-trial test for neurobiological studies  
26 of memory in rats. 1: Behavioral data. *Behav Brain Res* 31, 47-59 (1988).
- 27 61. J. L. Silverman, S. S. Tolu, C. L. Barkan, J. N. Crawley, Repetitive  
28 self-grooming behavior in the BTBR mouse model of autism is blocked by  
29 the mGluR5 antagonist MPEP. *Neuropsychopharmacology* 35, 976-989  
30 (2010).
- 31 62. L. A. Tellez, W. Han, X. Zhang, T. L. Ferreira, I. O. Perez, S. J.  
32 Shammah-Lagnado, A. N. van den Pol, I. E. de Araujo, Separate  
33 circuitries encode the hedonic and nutritional values of sugar. *Nat*  
34 *Neurosci* 19, 465-470 (2016).

- 1 63. W. T. Golde, P. Gollobin, L. L. Rodriguez, A rapid, simple, and humane  
2 method for submandibular bleeding of mice using a lancet. *Lab Anim (NY)*  
3 **34**, 39-43 (2005).

4

5

# Figure 1

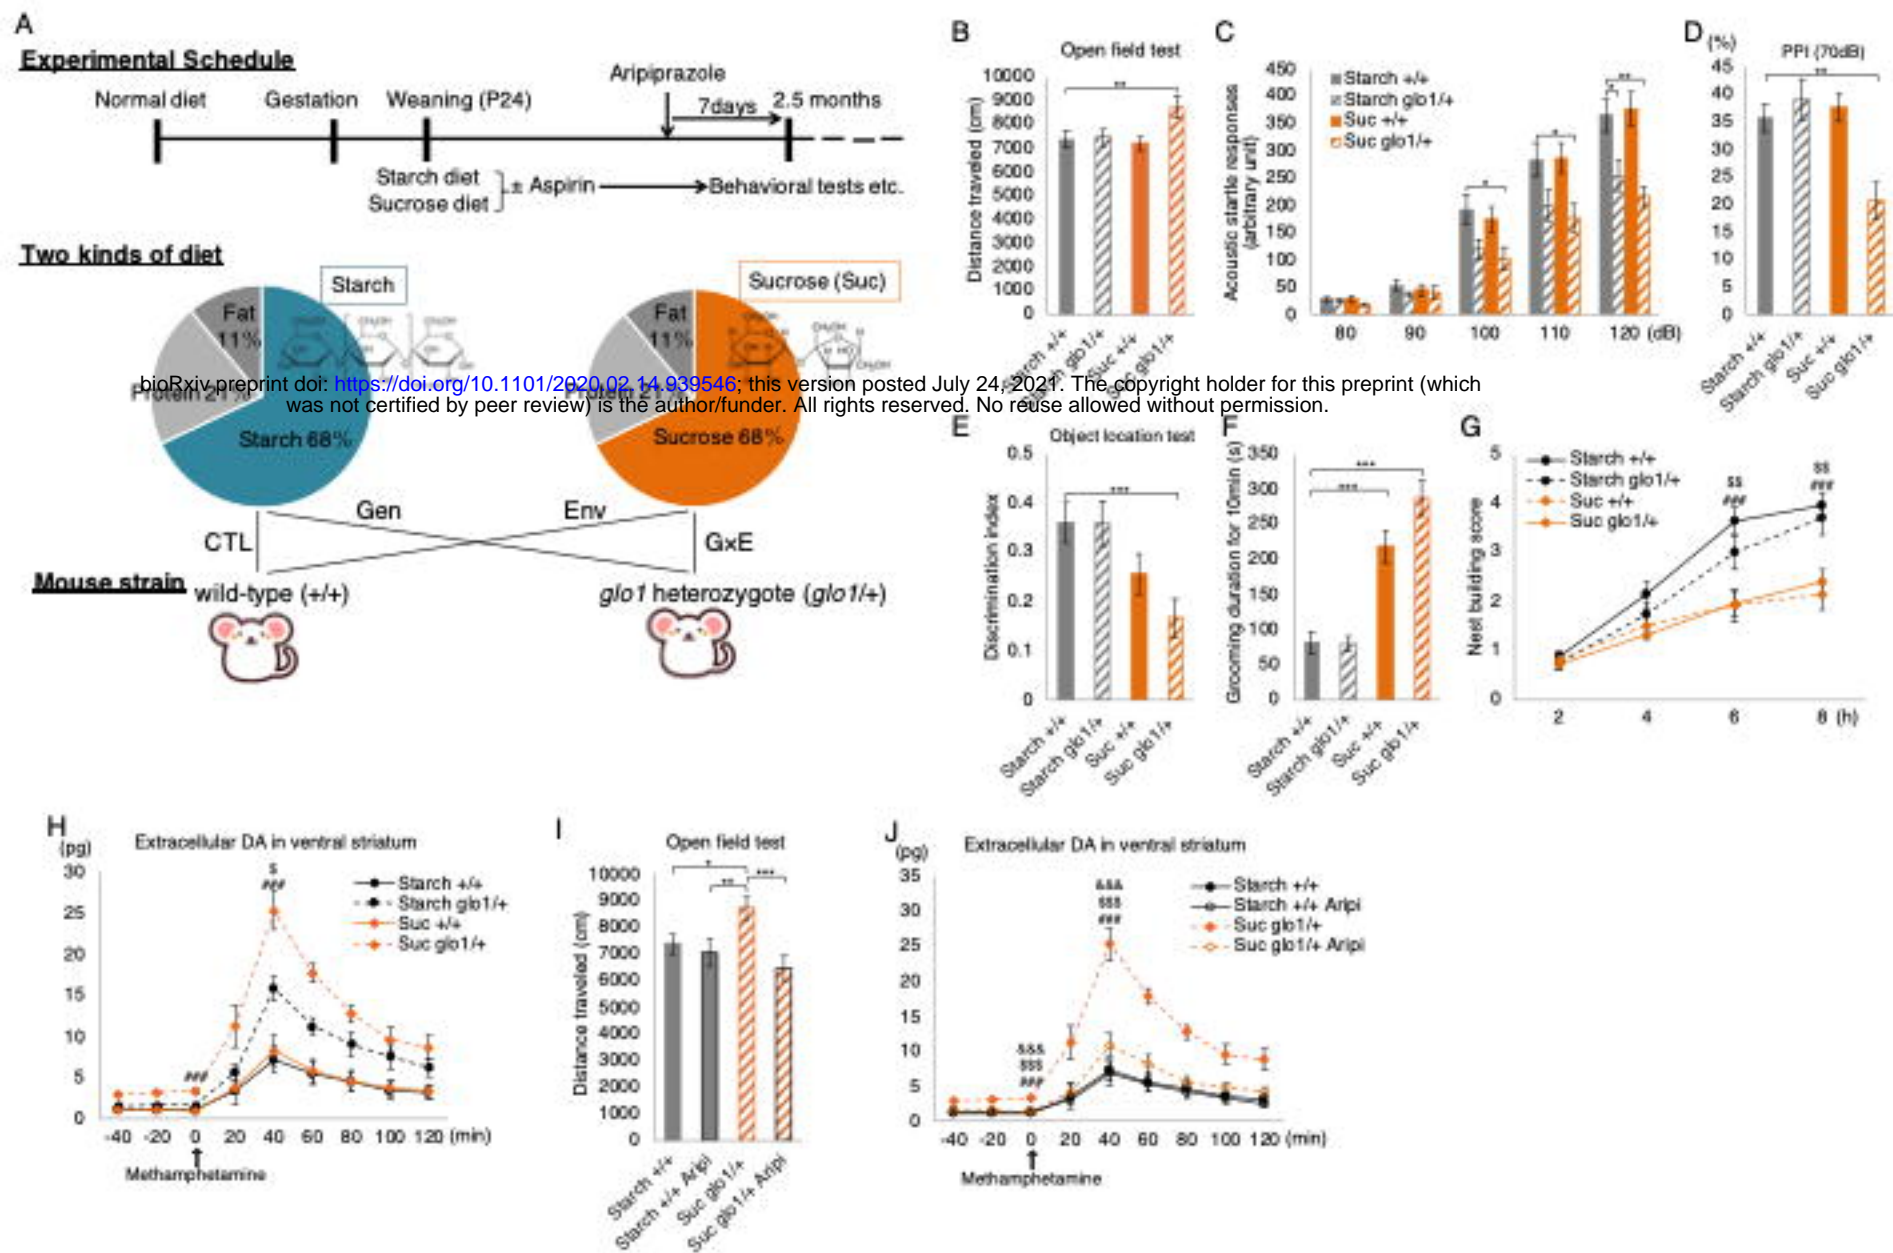

**Fig. 1 Generation of G × E model mice and psychosis-related phenotype analyses.**

(A) Experimental Timeline. See Materials and Methods for a complete description. (B–G) Behavioral analyses in the four groups of mice ( $n = 18–23$  mice per group). (B) Spontaneous locomotor activity in the open-field test. (C) Acoustic startle responses. (D) Pre-pulse inhibition (PPI) using a 70 dB pre-pulse. (E) Object location test to evaluate working memory. (F) Duration of self-grooming in the home cage. (G) Quantification of nest-building skills over 8 h. Post hoc Dunnett's multiple comparisons test among groups at each time point indicated  $###p < 0.001$  for Suc *glo1*<sup>+/+</sup> vs. Ctrl (Starch *+/+*),  $##p < 0.01$  for Suc *+/+* vs. Ctrl (Starch *+/+*). (H, J) Extracellular dopamine (DA) concentration in the nucleus accumbens measured at 20 min intervals using an *in vivo* microdialysis system in the presence or absence of aripiprazole (Aripip). Methamphetamine (1.25 mg/kg) was administered via intraperitoneal (i.p.) injection at time 0 (arrow) ( $n = 6–11$  mice per group). See Materials and Methods for detailed statistical analyses. (I) Effects of Aripip treatment on locomotor activity ( $n = 12–18$  mice per group). (B–H) Starch *+/+* group was used as a control for post hoc Dunnett's test. All data are presented as mean  $\pm$  SEM.  $***p < 0.001$ ,  $**p < 0.01$ ,  $*p < 0.05$



# Figure 2

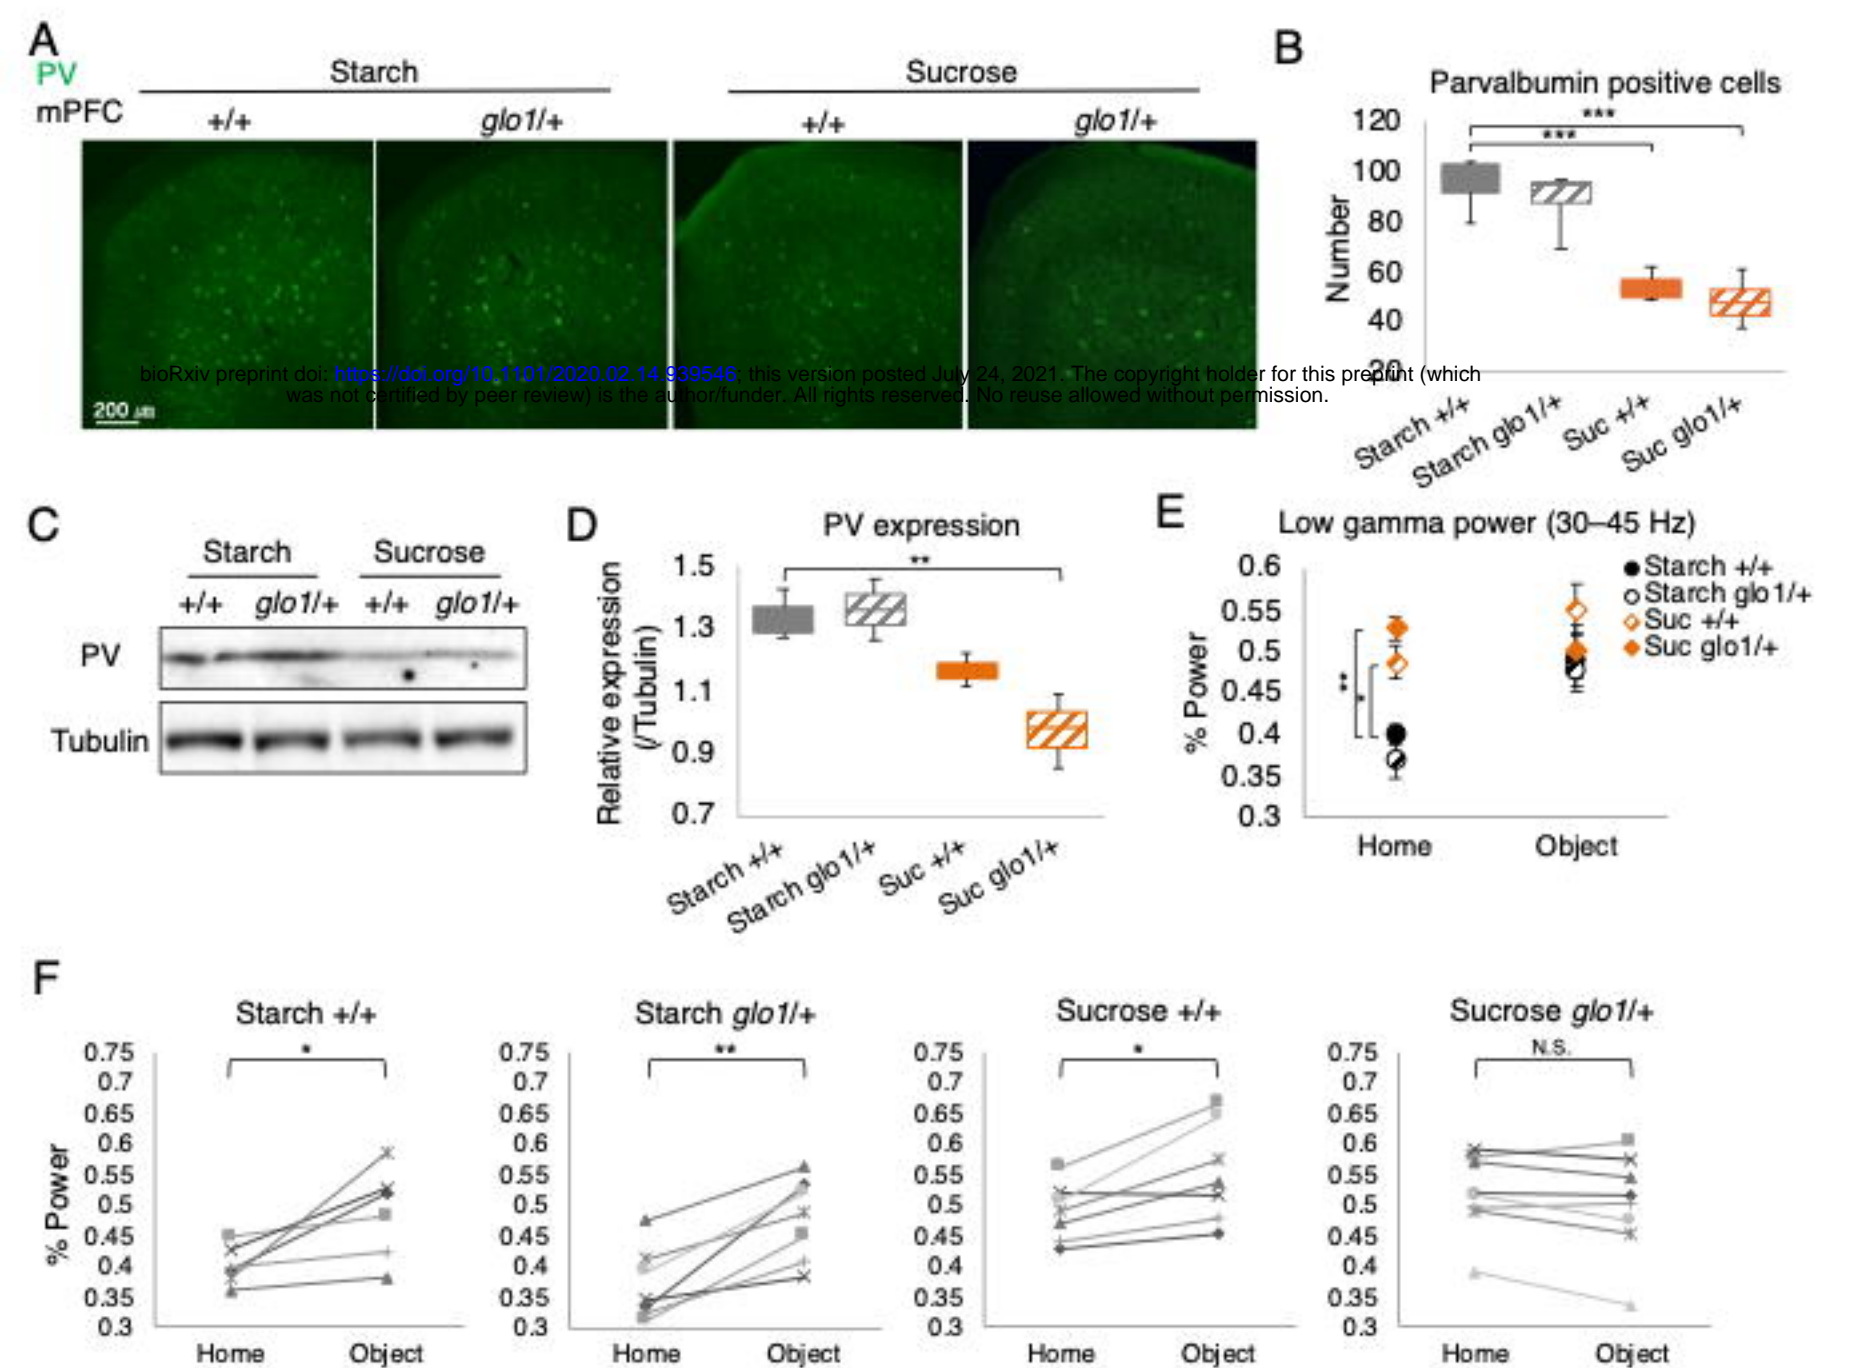

**Fig. 2 Parvalbumin-positive interneuron dysfunction in G × E mice.**

(A) Parvalbumin (PV) immunohistochemistry in the medial prefrontal cortex (mPFC). (B) Number of PV-positive cells in the mPFC ( $n = 4$  mice per group). (C) Western blot analysis of PV protein expression using tubulin as internal control. (D) Densitometric analysis of PV protein expression: PV band intensities were divided by the corresponding tubulin band intensities ( $n = 3$  mice per group). (E) Average gamma band power in the home cage and during novel object recognition in the open field ( $n = 7-8$  mice per group). (F) Changes in gamma band power from the home cage to the novel object phase in individual mice ( $n = 7-8$  mice per group). Each  $p$  value indicates the result of repeated measures analysis of variance (ANOVA). The effect of changes in gamma power at Starch  $+/+$  ( $F_{1, 5} = 8.29, p = 0.035$ ), at Starch  $glo1/+$  ( $F_{1, 6} = 29.75, p = 0.0016$ ), at Sucrose  $+/+$  ( $F_{1, 6} = 12.04, p = 0.013$ ), at Sucrose  $glo1/+$  ( $F_{1, 7} = 4.038, p = 0.084$ ). (B, D, H) Starch  $+/+$  group was used as control for post hoc Dunnett's test. All data are presented as mean  $\pm$  SEM. \*\*\* $p < 0.001$ , \*\* $p < 0.01$ , \* $p < 0.05$

# Figure 3

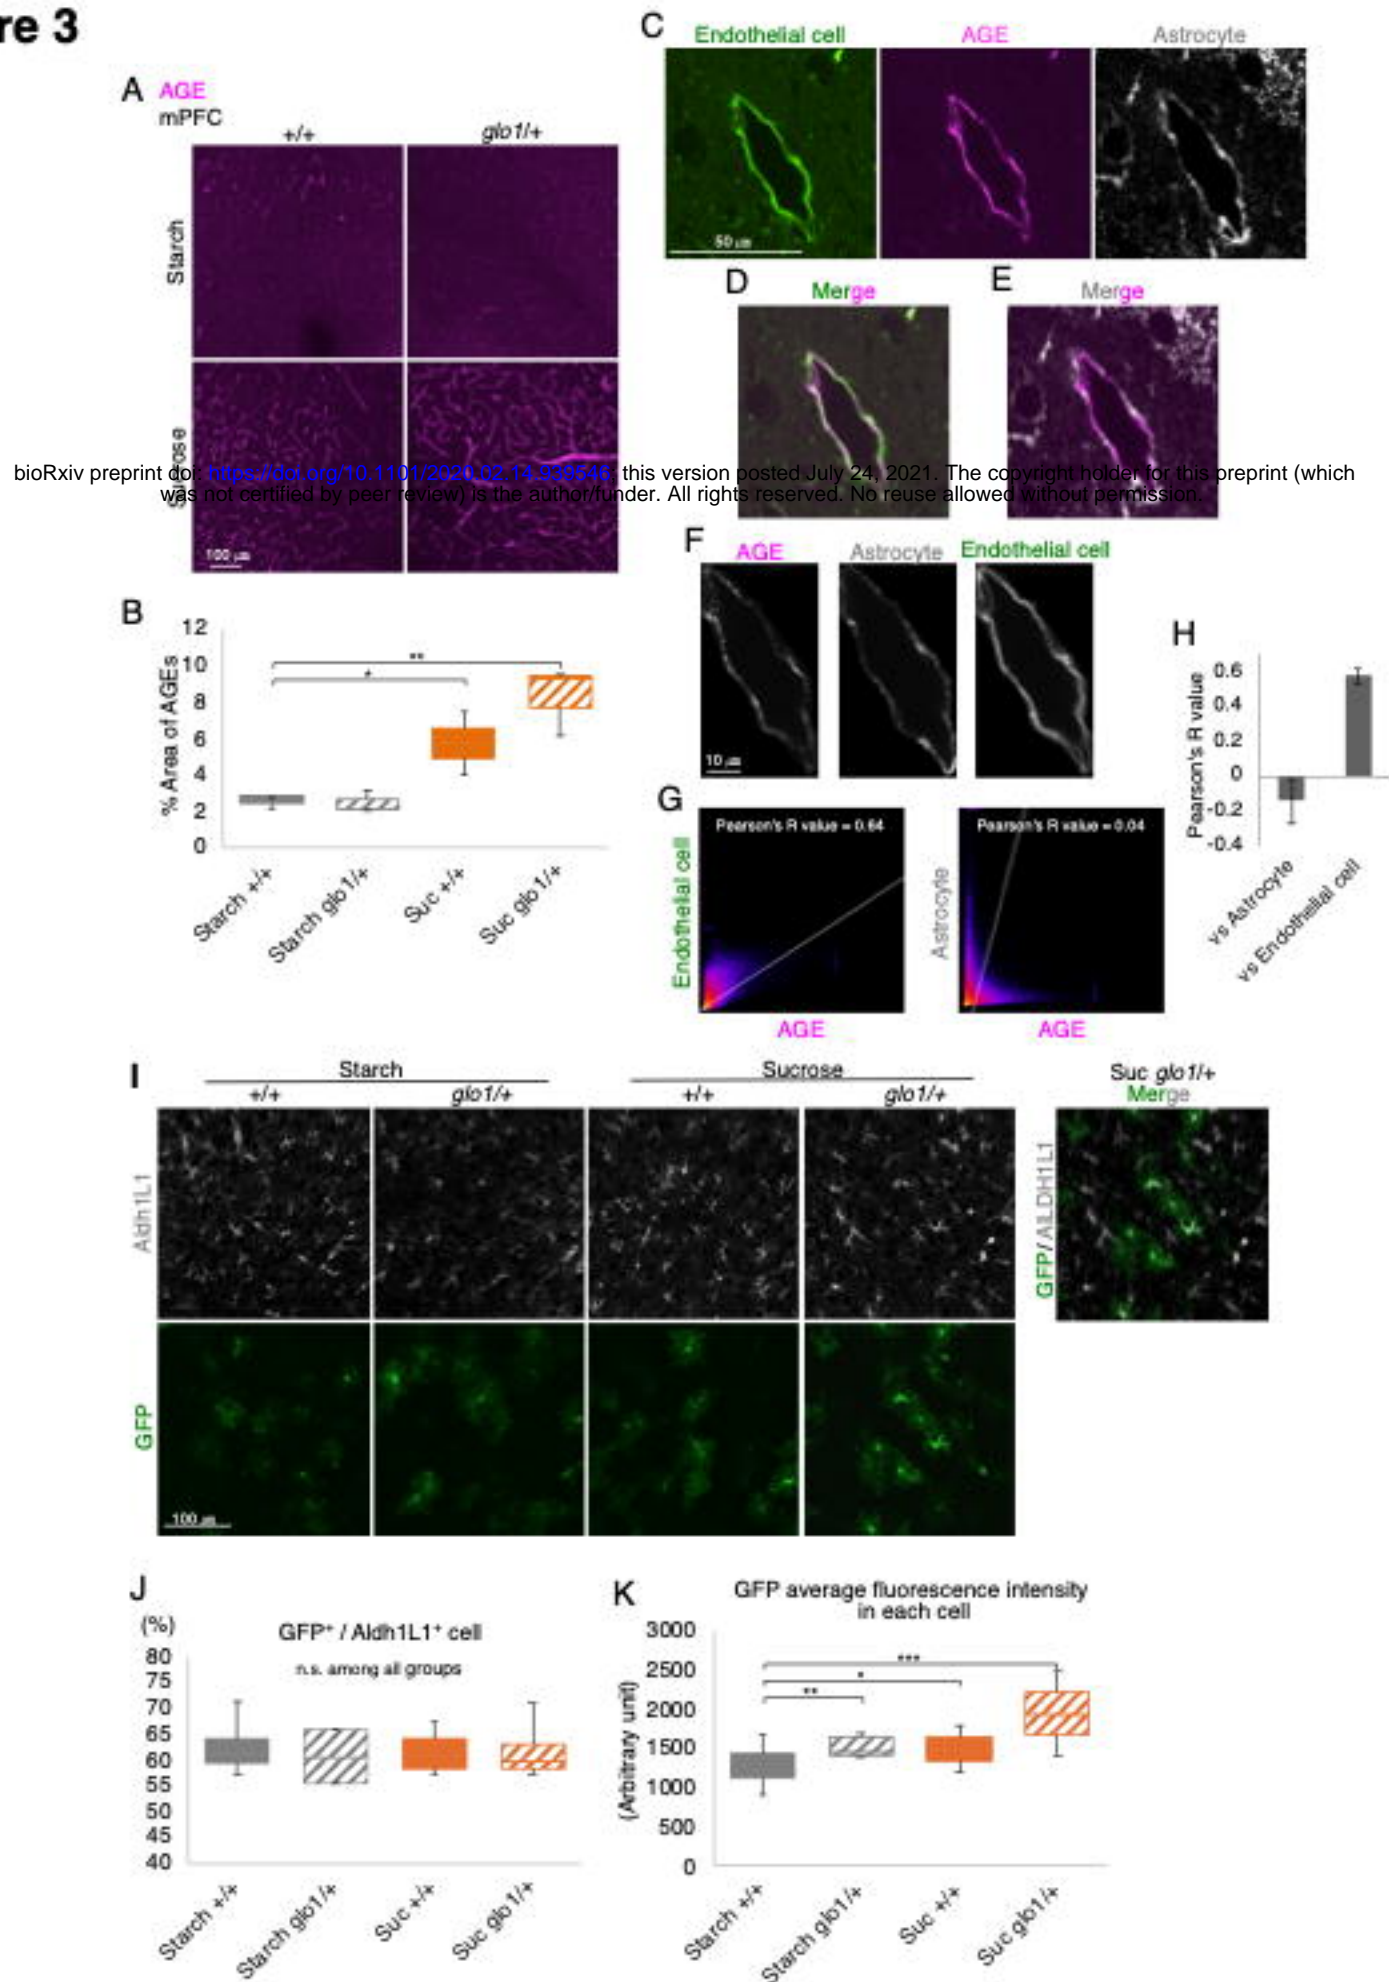

**Fig. 3 AGE accumulation in the neurovascular endothelium and pre-inflammatory status of astrocytes in  $G \times E$  mice.**

(A) AGE immunohistochemistry in the medial prefrontal cortex. (B) Measurement of AGE immunoreactive area. The mean intensity of the AGE-immunopositive area in the entire image was measured for each section ( $n = 3$  mice per group). (C–E) Colocalization of the endothelial cell marker tomato lectin with the astrocytic marker ALDH1L1 or AGEs. (F) Enlarged version of images in (C) presenting the region used for colocalization analysis. (G) 2D intensity histogram of the two indicated channels for identifying the colocalization of AGE with ALDH1L1 (Astrocyte) or tomato lectin (Endothelial cell). (H) Average R-value of colocalization data including (G) three different locations of three mice. (I) Immunohistological images of GFP-positive astrocytes and ALDH1L1 in the mPFC region and merged GFP/ALDH1L1 image. (J) Percentage of GFP-positive cells per total ALDH1L1-positive cells in each image in (I). (K) Mean fluorescent GFP intensities of 10 randomly selected cells per image in (I) (from four independent mice). (B, J, K) The Starch +/+ group was used as control for post hoc Dunnett's test. All data are presented as mean  $\pm$  SEM. \*\*\* $p < 0.001$ , \*\* $p < 0.01$ , \* $p < 0.05$



# Figure 4

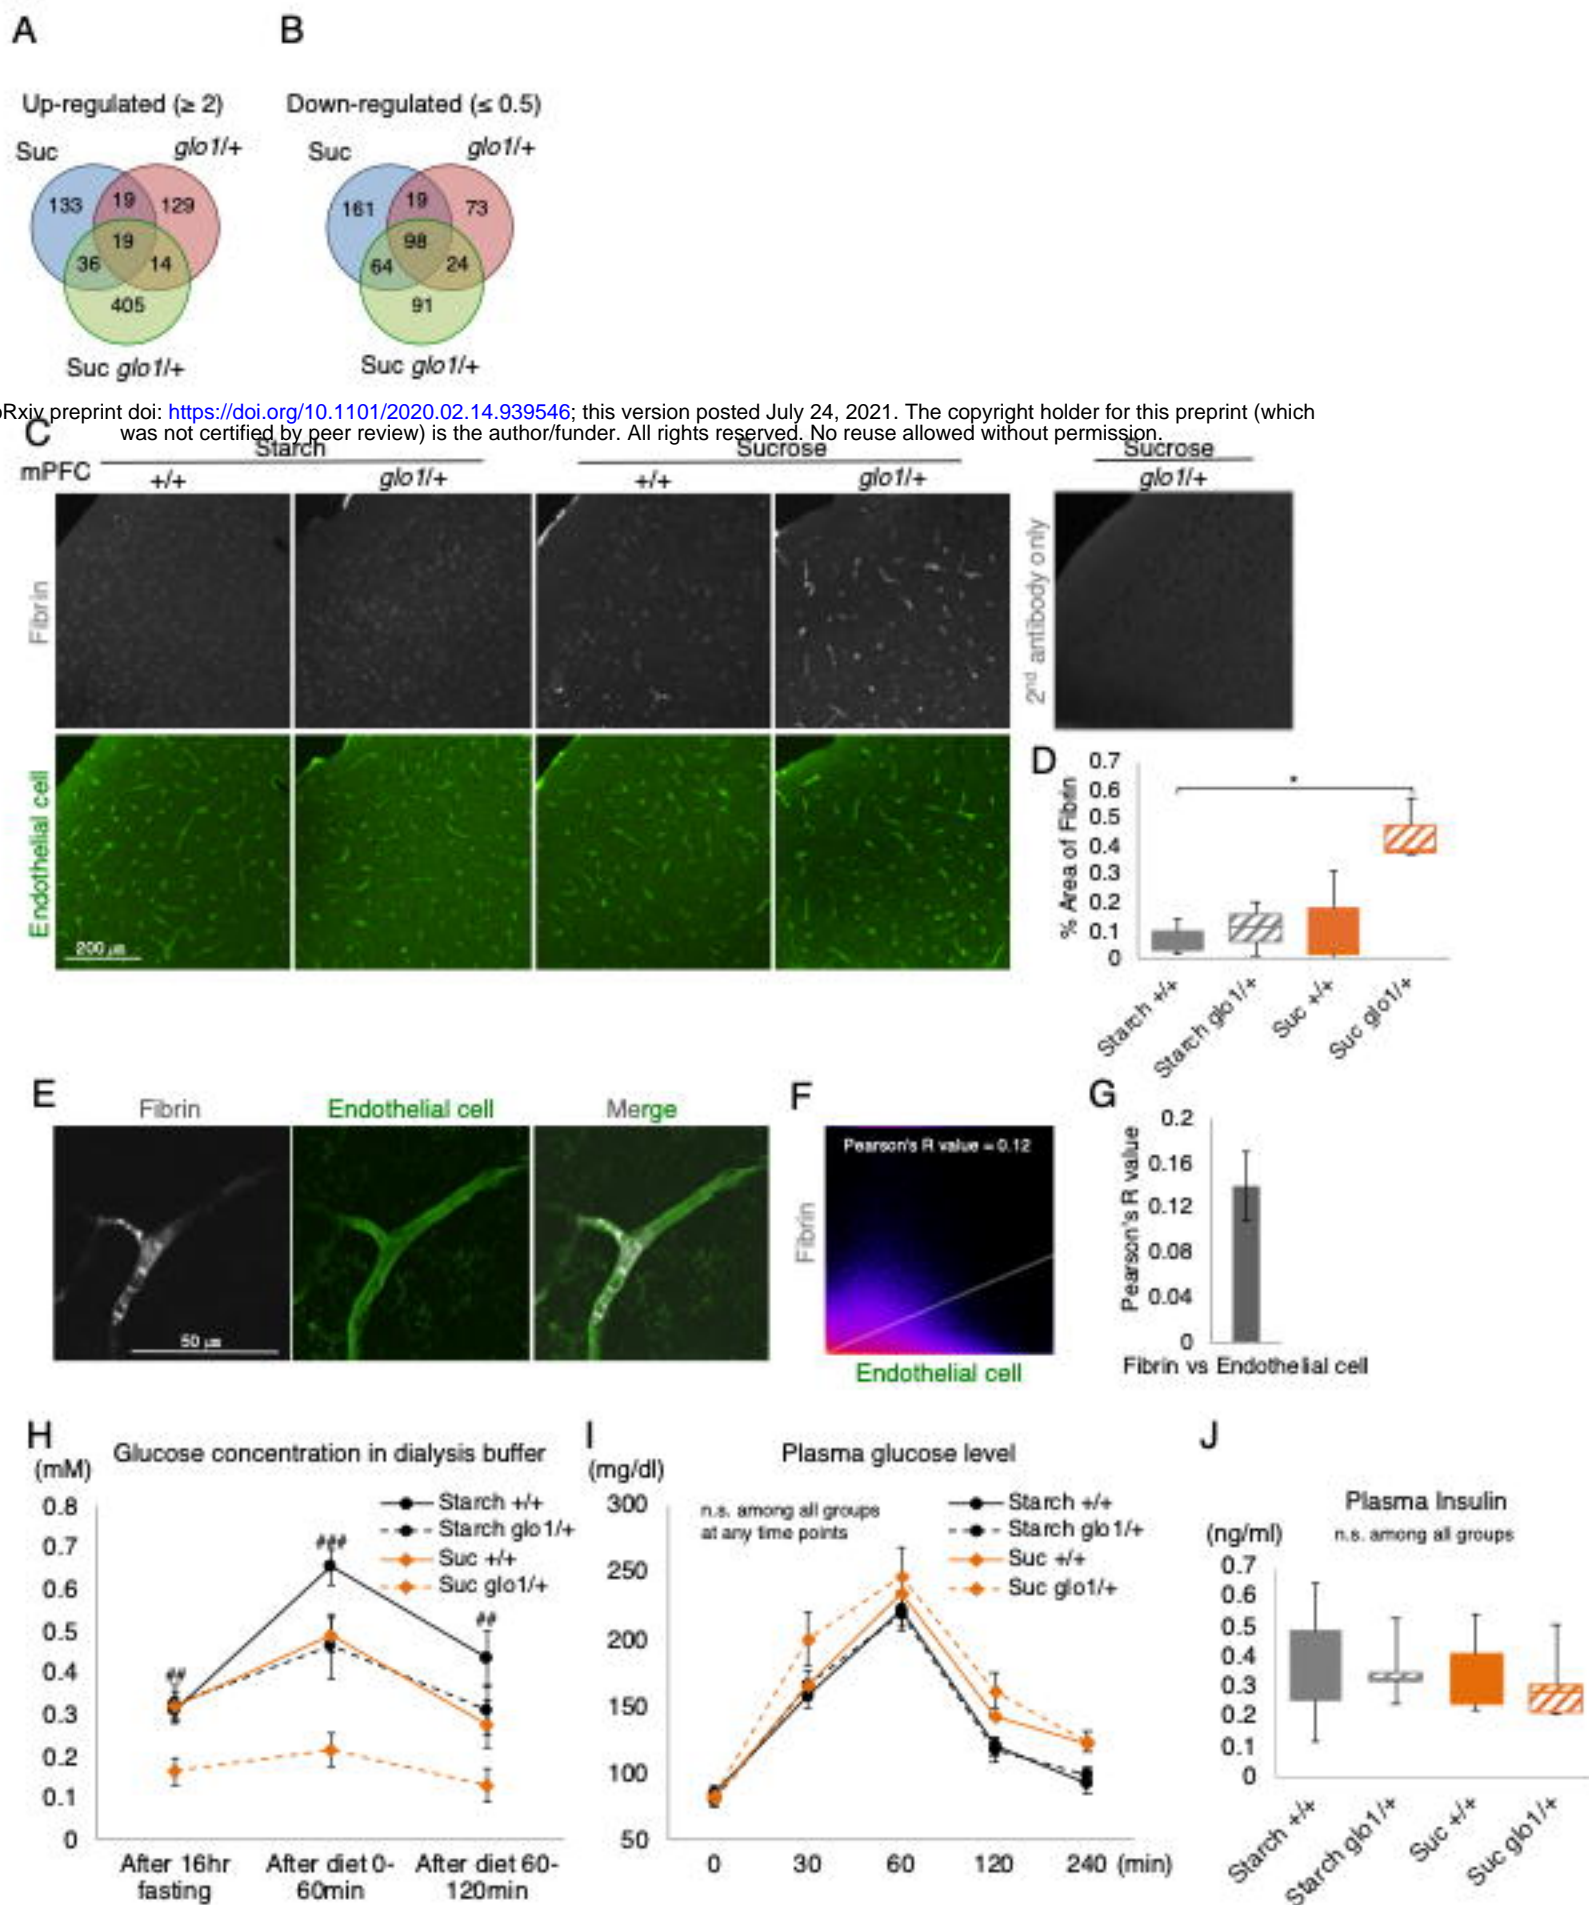

bioRxiv preprint doi: <https://doi.org/10.1101/2020.02.14.939546>; this version posted July 24, 2021. The copyright holder for this preprint (which was not certified by peer review) is the author/funder. All rights reserved. No reuse allowed without permission.

## Fig. 4 Angiopathy and impaired glucose transport in G x E mice.

(A, B) Venn graph showing overlap in prefrontal cortex genes exhibiting a  $>2$ -fold (A) or  $<0.5$ -fold (B) expression change compared with the control (CTL) group ( $n = 3$  mice per group). (C) Immunohistochemical images of fibrin and the endothelial cell marker tomato lectin. (D) Measurement of the area of fibrin immunoexpression in (C). The mean intensity of the fibrin-immunopositive area of the entire image was measured for each section ( $n = 4$  mice per group). (E) Magnified immunohistochemical images of fibrin and the endothelial cell marker tomato lectin. (F) 2D intensity histogram of the two indicated channels using the left and middle panels in (E) for identifying fibrin colocalization with tomato lectin. (G) Average R-value of colocalization data in (F) from three different locations of three mice. (H) Extracellular glucose concentrations in the dialysis buffer from mPFC samples at each time point ( $n = 5-6$  mice per group). See the Materials and Methods for detailed statistical analyses. (I) Plasma glucose concentrations ( $n = 6-7$  mice per group). The first measurement was performed after 16 h of fasting, and the second blood collection 30 min after eating 0.05 g of carbohydrates. (J) Fasting plasma insulin levels ( $n = 5-6$  mice per group). (D, H-J) Starch  $+/+$  group was used as a control for post hoc Dunnett's test. All data are presented as mean  $\pm$  SEM. \* $p < 0.05$

Remark: Please clarify the difference with B) in this same figure.



# Figure 5

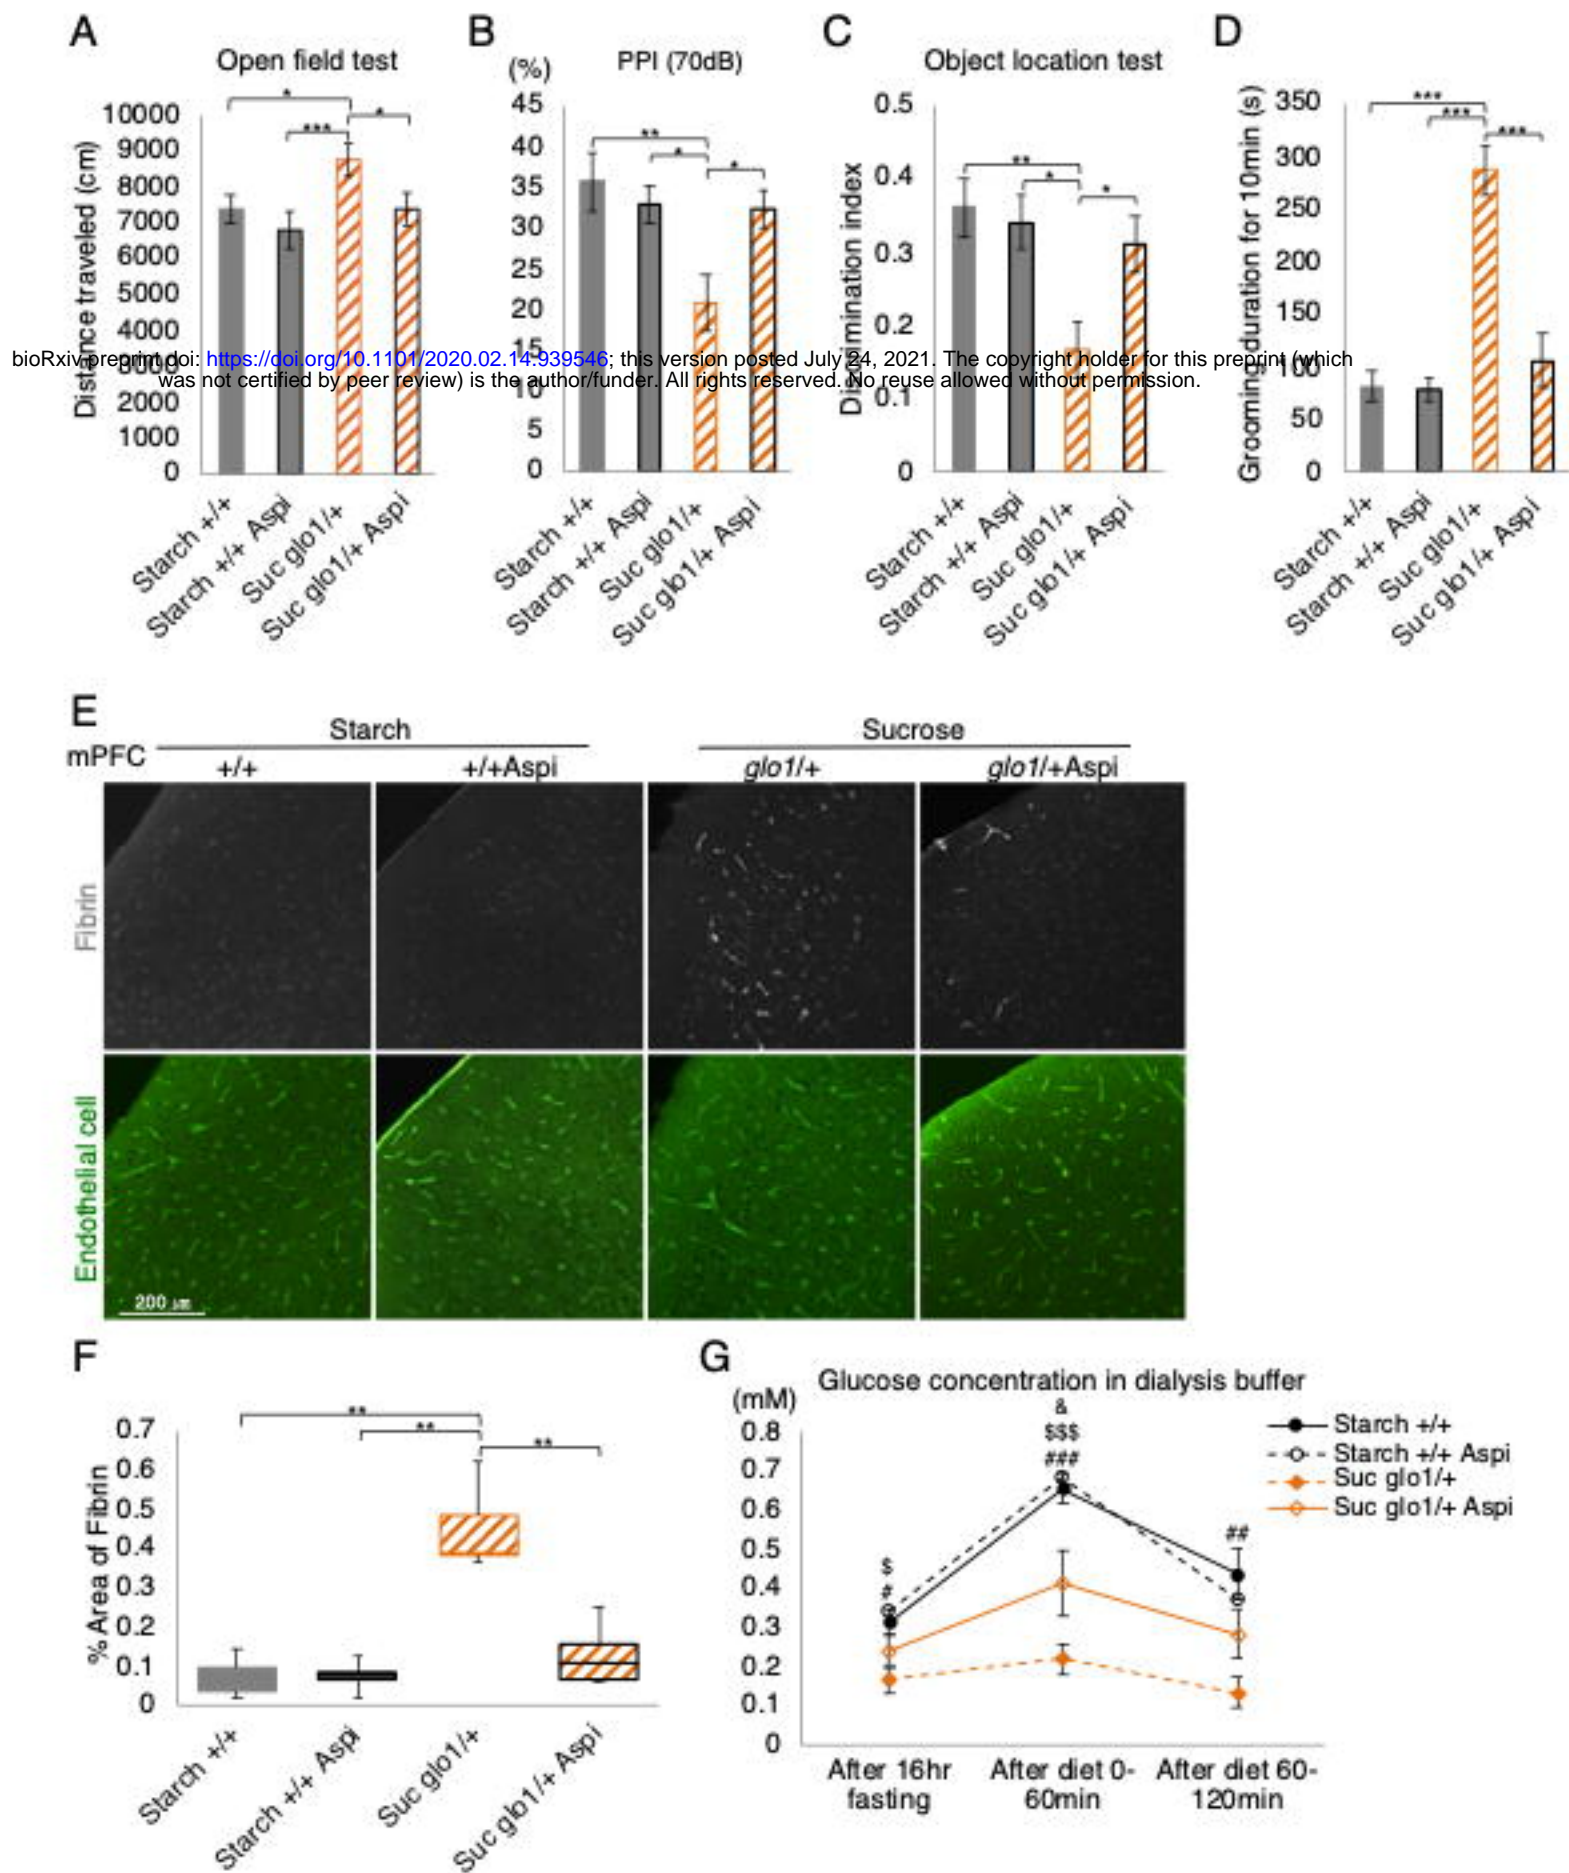

**Fig. 5 Protective effects of low-dose aspirin in G × E mice.**

(A–D) Results of behavioral tests performed to evaluate the effects of aspirin treatment (n = 12–21 mice per group). (A) Quantification of spontaneous locomotor activity in the open field. (B) Pre-pulse inhibition at 70 dB. (C) Object location test of working memory. (D) Quantification of nest-building skills over 8 h. (E) Immunohistochemical images of fibrin and the endothelial cell marker tomato lectin. (F) Measurement of the area of fibrin immunoexpression in (E). The mean intensity of the fibrin-immunopositive area of the entire image was measured for each section (n = 3 mice per group). (G) Extracellular glucose concentrations in the dialysis buffer at each time point (n = 4–6 mice per group). Post hoc Tukey's multiple comparisons test of groups at each time point,  $^{***}p < 0.001$ ,  $^{**}p < 0.01$ ,  $^{*}p < 0.05$  for Starch +/+ vs. Suc glo1/+,  $^{sss}p < 0.001$ ,  $^{s}p < 0.05$  for Starch +/+ Aspi vs. Suc glo1/+,  $^{&}p < 0.05$  for Starch +/+ vs. Suc glo1/+ Aspi. All data are presented as mean ± SEM.  $^{***}p < 0.001$ ,  $^{**}p < 0.01$ ,  $^{*}p < 0.05$

# Figure 6

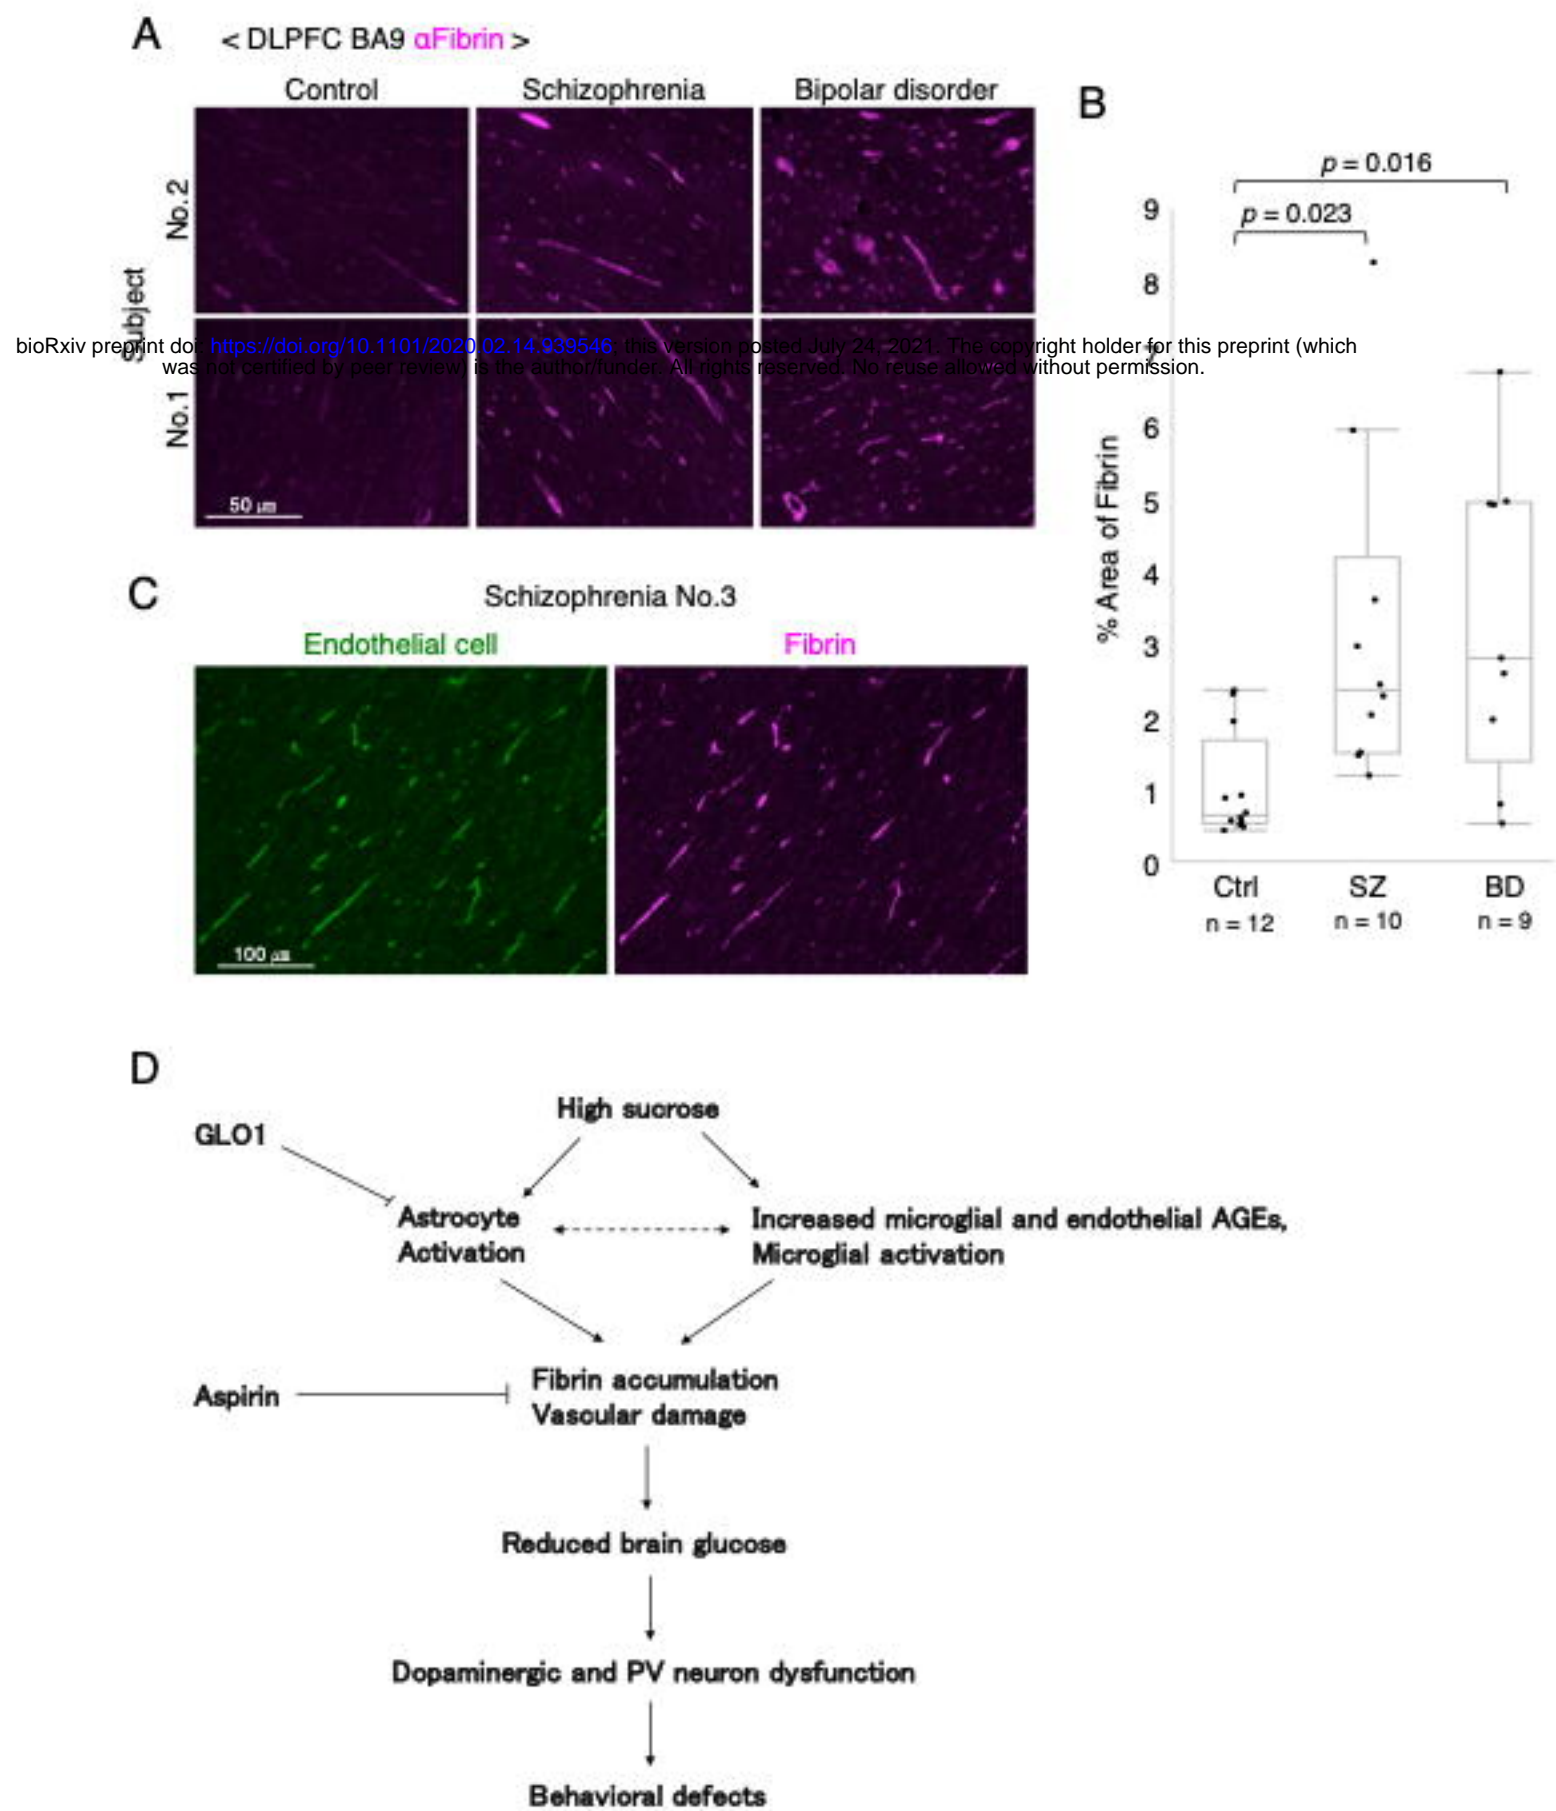

**Fig. 6 Angiopathy in postmortem brains from individuals with psychiatric disorders.**

(A) Representative immunohistochemical fibrin images in the BA9 region of postmortem brains from controls and patients with schizophrenia (SZ) or bipolar disorder. (B) Measurement of the area of fibrin immunopositive area in (A). The mean intensity of the fibrin-immunopositive area of the entire image was measured for each section. (C) Representative immunohistochemical images of fibrin (magenta) and the endothelial cell marker tomato lectin (green) in postmortem brains from a patient with SZ. Fibrin-positive areas are merged with areas of vascular endothelial cell marker expression. (D) Diagrams describing the hypothesis proposed to explain functional and behavioral abnormalities in control (CTL) mice (left) and G  $\times$  E mice (right) (see the Discussion for details). All data are presented as mean  $\pm$  SEM. \*\* $p < 0.01$



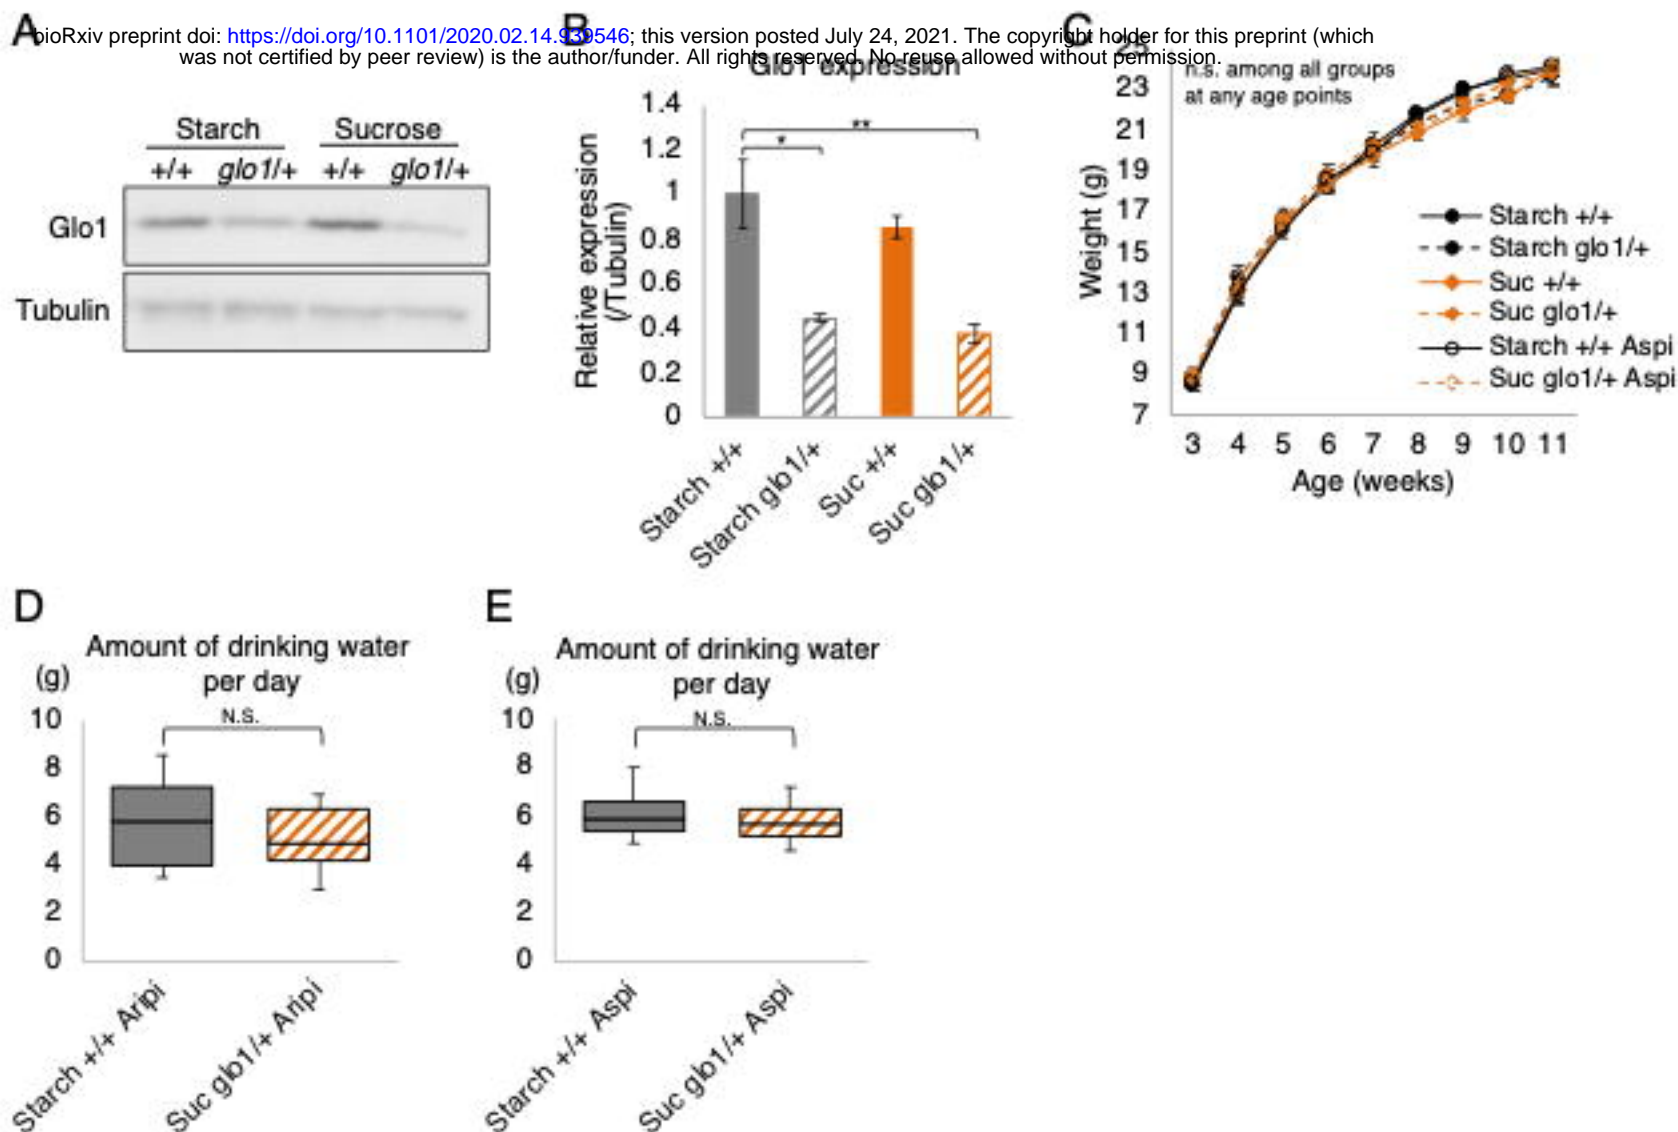

**Supplementary Figure 1 Characterization of regional GLO1 expression in WT and heterozygous *Glo1* mutant mice fed starch or sucrose.**

(A) Western blot analysis of GLO1 protein expression using tubulin as internal control. The cerebral cortex, including the hippocampus, was used as loading sample. (B) Densitometric analysis of GLO1 protein expression (n = 3 or 4 mice per group). To quantify expression, GLO1 band intensities in (A) were divided by the intensities of the corresponding tubulin bands. (C) Body weight trajectories. No significant differences were observed among groups (n = 6–10 mice per group). (D, E) Measurement of aripiprazole- or aspirin-containing water consumption per day to estimate drug intake (n = 4 mice per group). Student's *t*-test was used for statistical analysis. All data are presented as mean  $\pm$  SEM. \*\**p* < 0.01, \**p* < 0.05

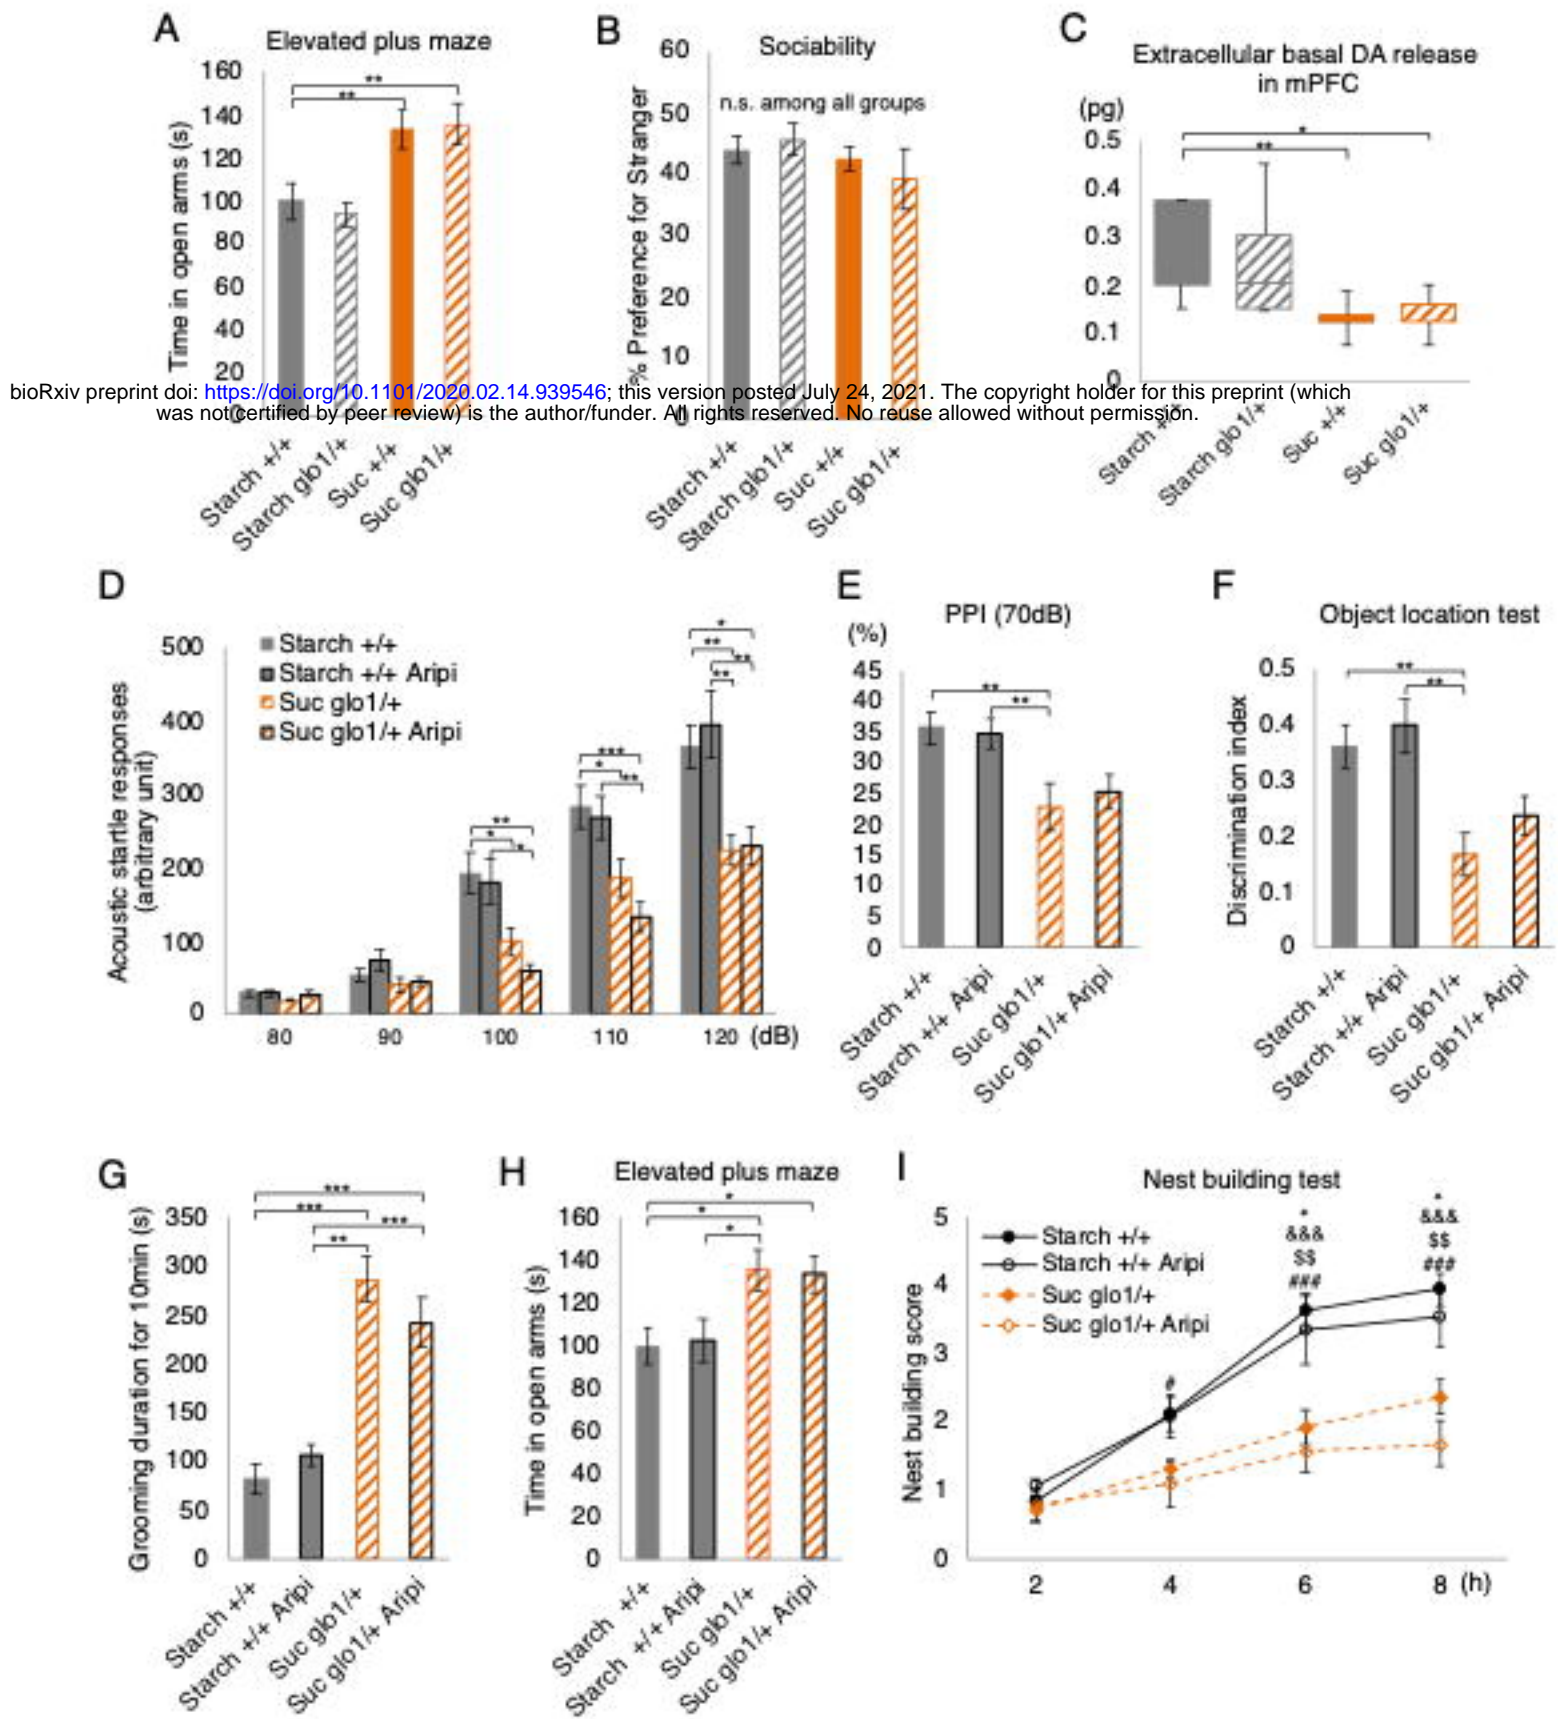

**Supplementary Figure 2 Analyses of psychiatric disease-related phenotypes in *Glo1* heterozygotic mice.**

(A, B) Behavioral analyses in the four groups of mice (n = 18–23 mice per group). (A) Elevated plus maze test to evaluate anxiety. (B) Preference for novel mouse in the three-chamber test, calculated as [(time spent exploring novel mouse)/(total time spent exploring novel mouse and novel object)] × 100%. (C) Extracellular dopamine concentration in the medial prefrontal cortex measured at 20-min intervals using an *in vivo* microdialysis system (n = 7–10 mice per group). (D–I) Effect of aripiprazole treatment on behavioral phenotypes (n = 12–18 mice per group). (D) Effects of aripiprazole treatment on the acoustic startle response, (E) pre-pulse inhibition (PPI) using a 70-dB pre-pulse, (F) object location test, (G) self-grooming, (H) elevated plus maze performance, and (I) nest-building skill. In (I), post hoc Tukey's multiple comparisons test of groups at specific time points,  $^{***}p < 0.001$ ,  $^p < 0.05$  for Starch +/+ vs. Suc *glo1*/+ Arip,  $^{SS}p < 0.01$  for Starch +/+ Arip vs. Suc *glo1*/+ Arip,  $^{SSS}p < 0.001$  for Starch +/+ vs. Suc *glo1*/+,  $^*p < 0.05$  for Starch +/+ Arip vs. Suc *glo1*/+. All data are presented as mean ± SEM.  $^{***}p < 0.001$ ,  $^{**}p < 0.01$ ,  $^*p < 0.05$



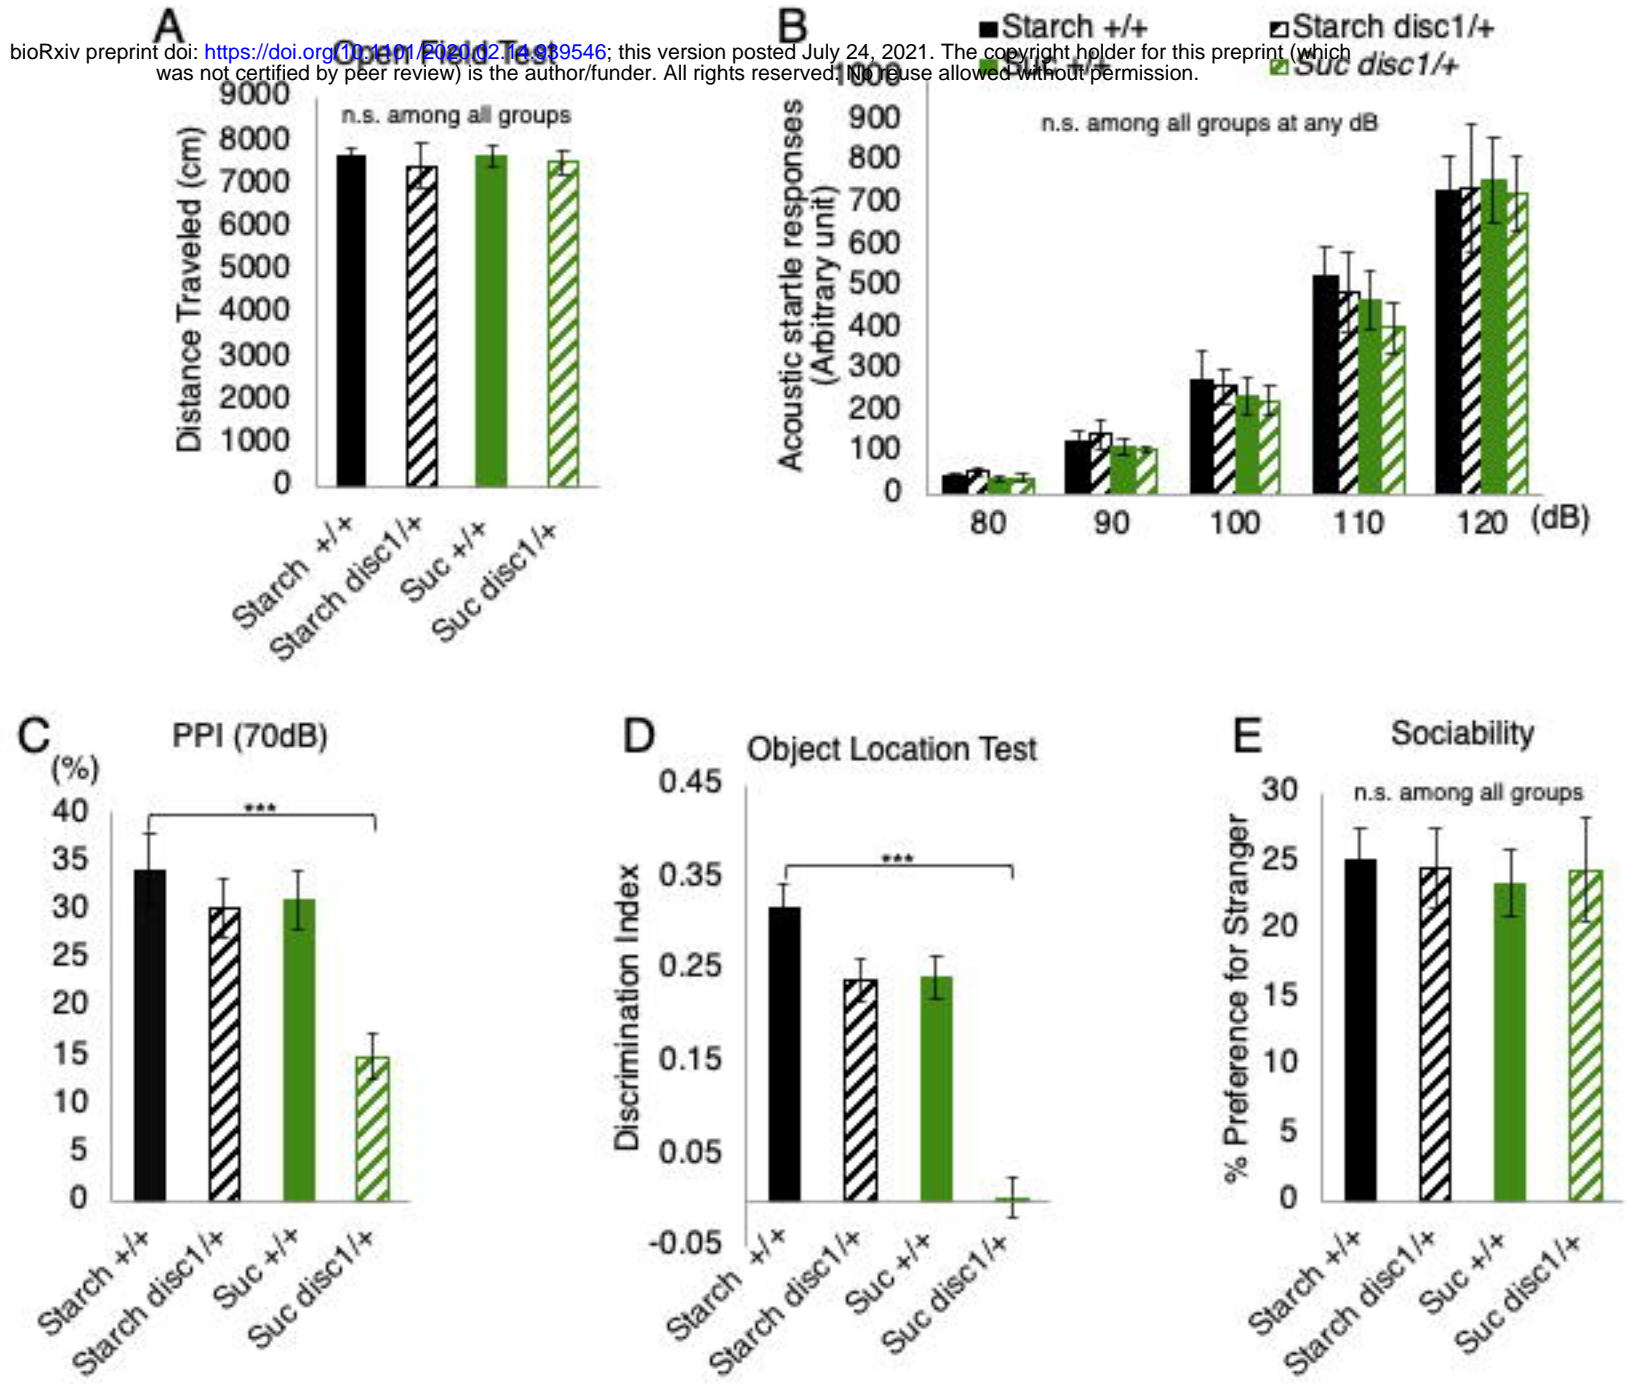

**Supplementary Figure 3 Analyses of psychiatric disease-related phenotypes in *Disc1* heterozygotic mice.**

(A-E) Behavioral analyses in the four groups of mice (n = 8–11 mice per group). (A) Spontaneous locomotor activity in the open-field test. (B) Acoustic startle responses. (C) Pre-pulse inhibition (PPI) using a 70 dB pre-pulse. (D) Object location test. (E) Preference for novel mouse in the three-chamber test, calculated as Fig. S2B. All data are presented as mean ± SEM. \*\*\*p < 0.001

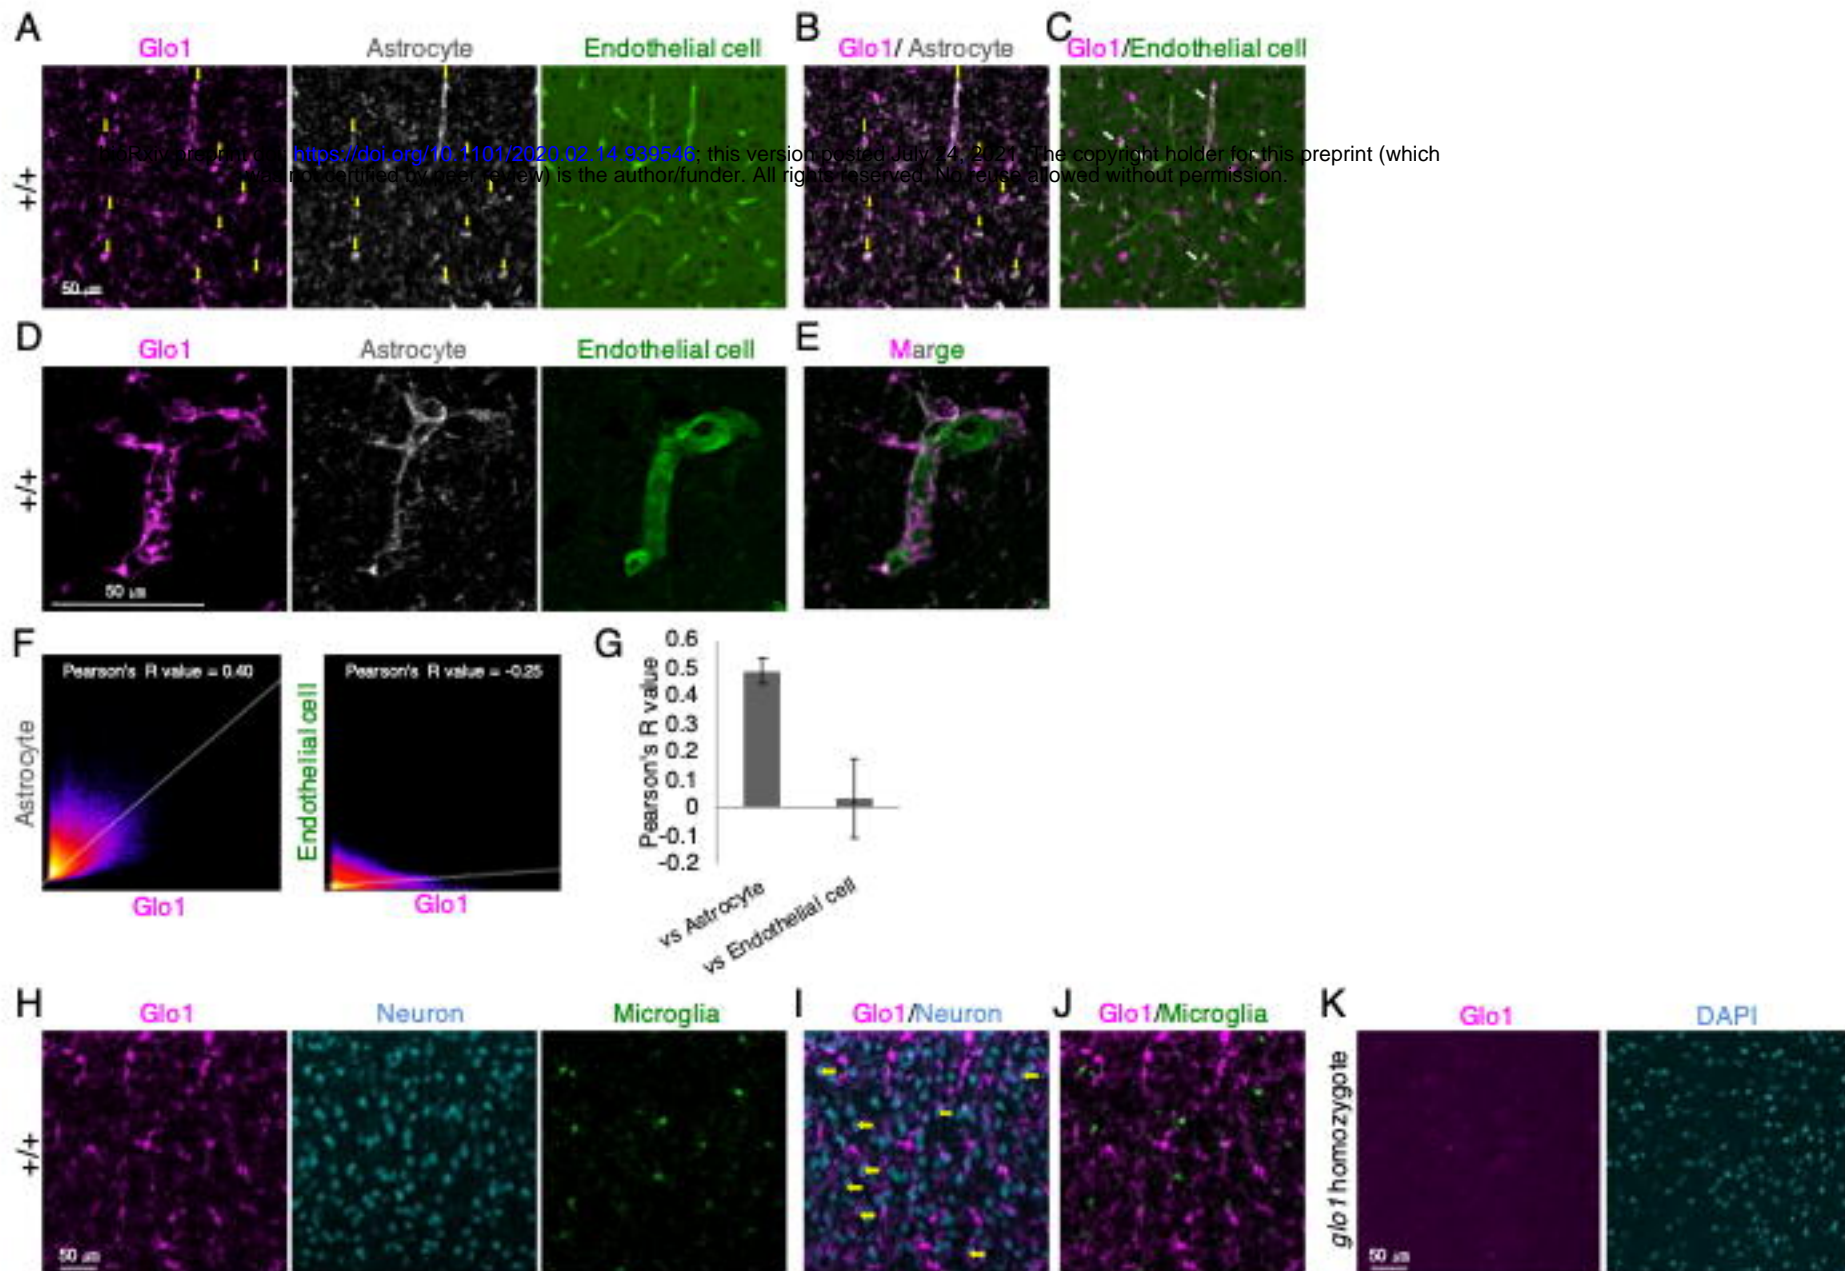

**Supplementary Figure 4 GLO1 cellular localization in the prefrontal cortex of sucrose-fed wild-type mice.**

(A–F) GLO1 localization in astrocytes. (A) GLO1 co-immunostaining with an astrocyte marker (ALDH1L1) or an endothelial cell marker (tomato lectin). (B) Merged GLO1/ALDH1L1 image from (A). Yellow arrows in (B) indicate cells with GLO1/ALDH1L1 colocalization. (C) Merged GLO1/lectin image from (A). White arrows denote representative GLO1-positive cells close to endothelial cells. (D, E) High magnification images of GLO1 co-immunostaining with ALDH1L1 or with tomato lectin. (E) Merged GLO1/ALDH1L1 image from (D). (F) 2D intensity histogram of the two indicated channels to identify GLO1 colocalization with ALDH1L1 or tomato lectin, interpreting the strength of a relationship based on R as follows:  $R \geq 0.7$ , strong;  $0.7 > R \geq 0.4$ , moderate;  $0.4 > R \geq 0.2$ , weak; and  $R < 0.2$ , none or very weak. (G) Average R-value of colocalization data including (F) from three different locations of three mice. (H) GLO1 co-immunostaining with the neuronal marker NeuN and the microglial marker IBA1. (I) Merged GLO1/NeuN image from (H). Yellow arrows indicate neurons with mild GLO1 immunoreactivity. (J) Merged GLO1/IBA1 image from (H). (K) GLO1 immunostaining and DAPI staining in *Glo1* homozygous mice.



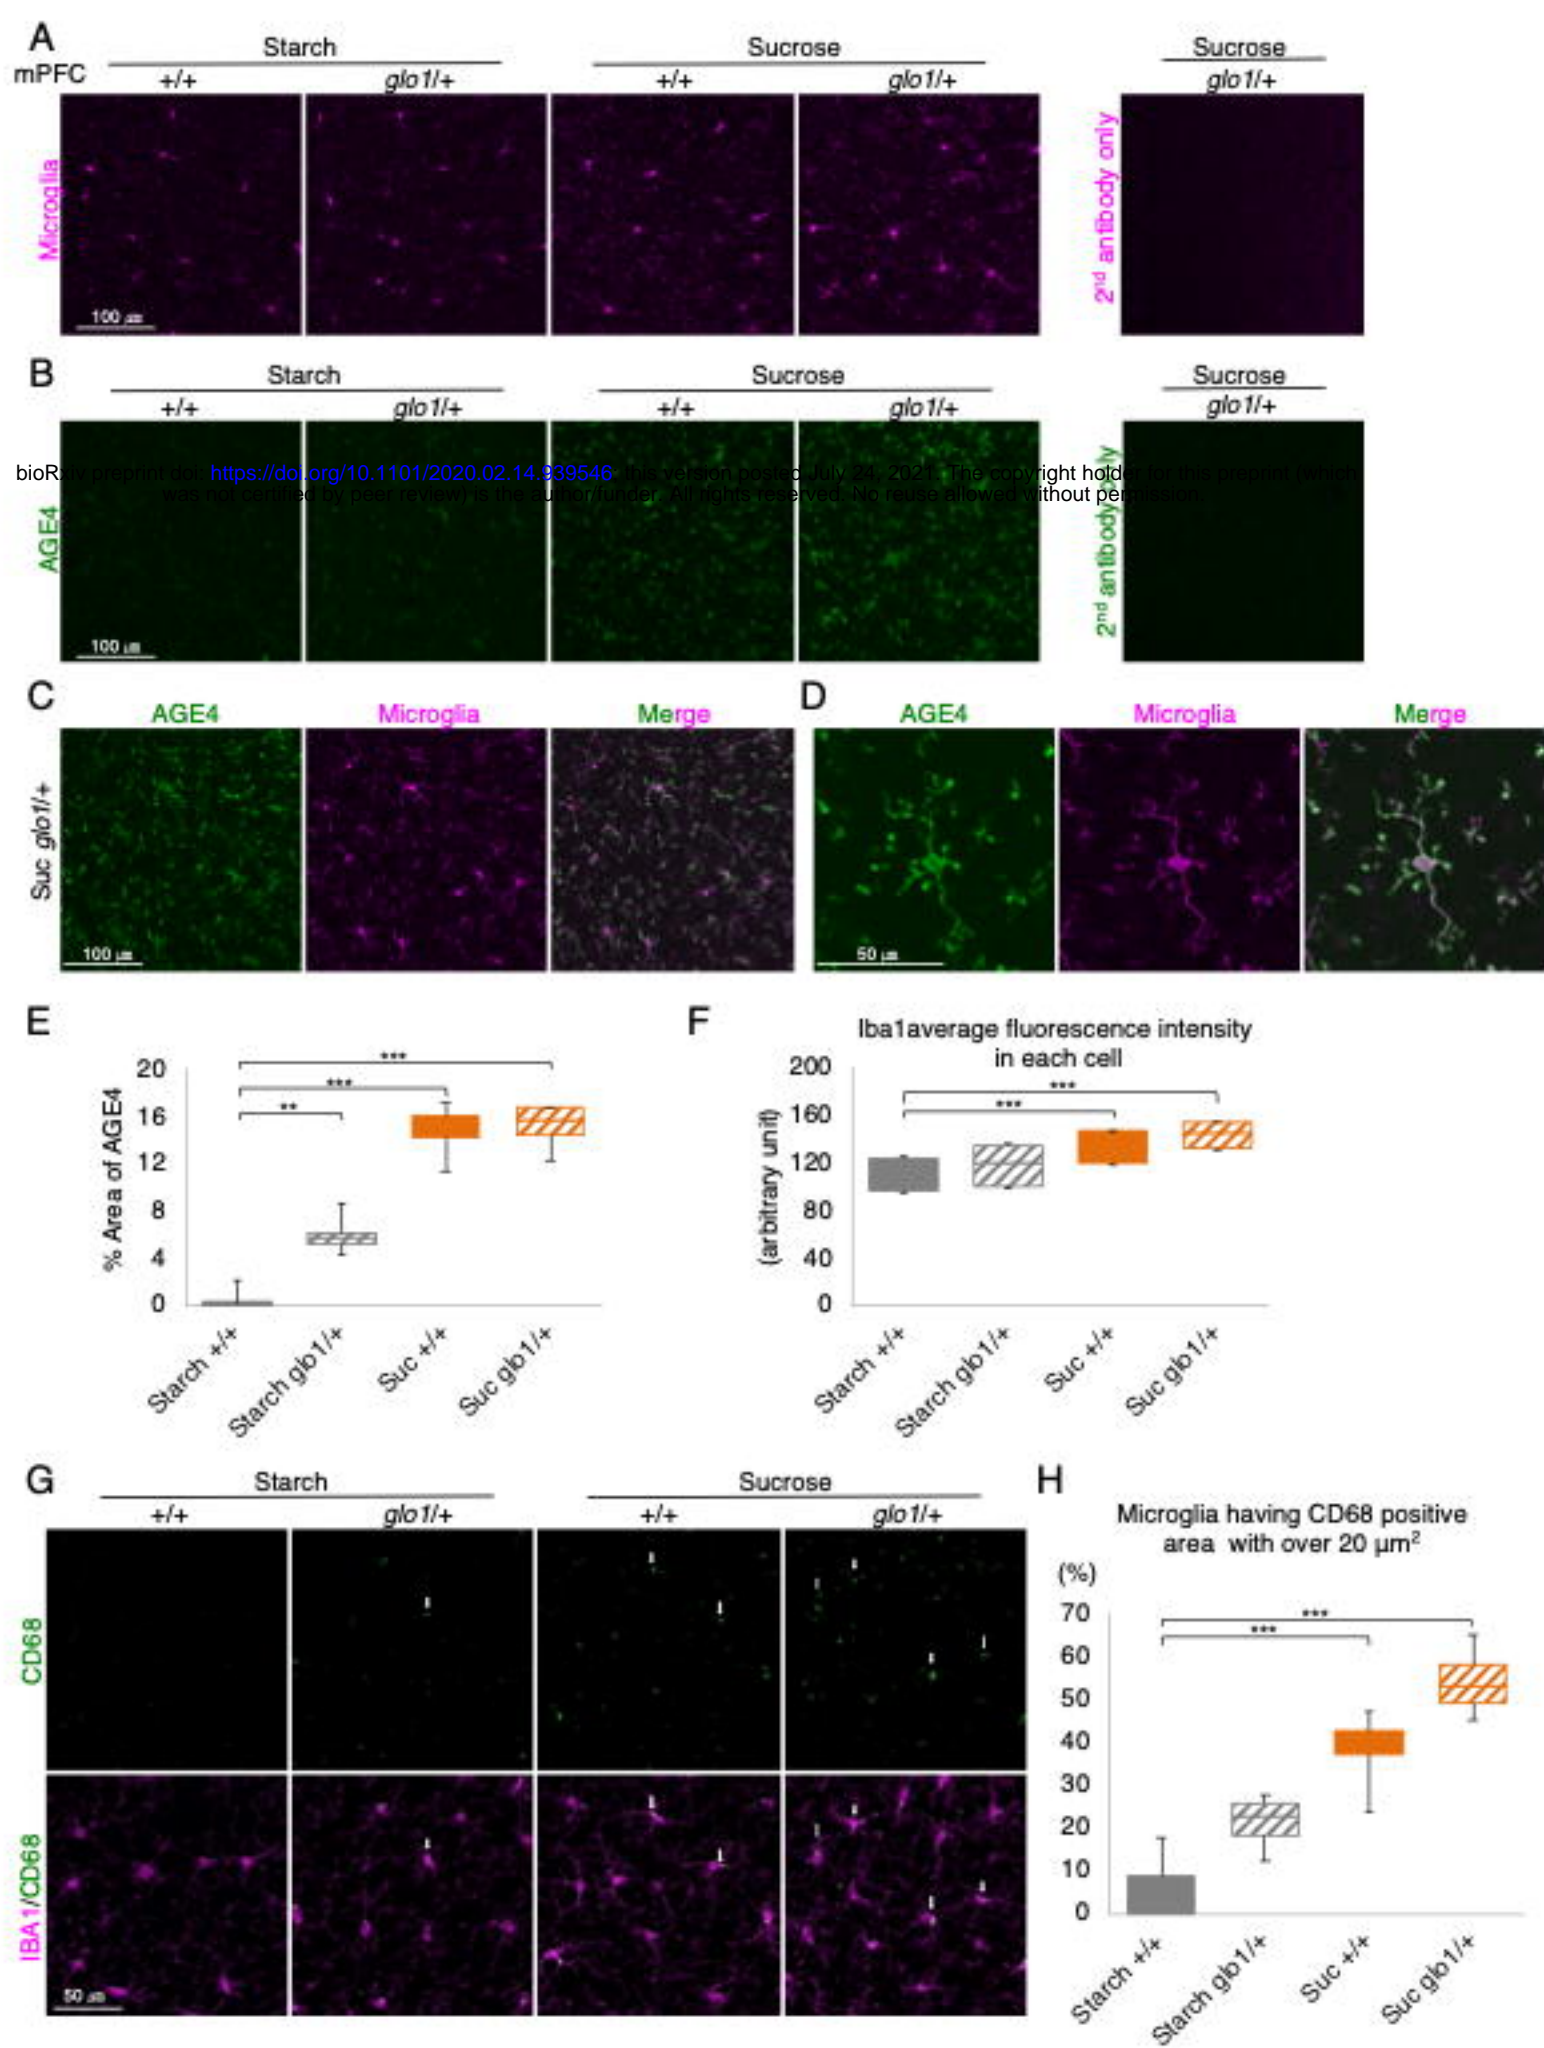

**Supplementary Figure 5 Fructose-derived AGE4 accumulation in microglia of sucrose-fed mice.**

(A, B) Immunohistochemical images of the microglial marker IBA1 and AGE4 in the medial prefrontal cortex region (mPFC). (C) Merged AGE4/IBA1 image. (D) High magnification images of AGE4 co-immunostaining with IBA1. (E) Measurement of the area of AGE4 immunopositivity in (B). The mean AGE4-immunopositive area intensity of the entire image was measured in each section ( $n = 4$  mice per group). (F) Mean IBA1 fluorescence intensities of five randomly selected cells per image in four independent mice. (G) Immunohistological images of IBA1- and CD68-positive microglia in the mPFC region. White arrows in (G) indicate microglial cells containing CD68-positive areas  $>20 \mu\text{m}^2$ . (H) Percentage of CD68-positive cells per total microglial cells in each image in (G). All data are presented as mean  $\pm$  SEM. \*\*\* $p < 0.001$ , \*\* $p < 0.01$

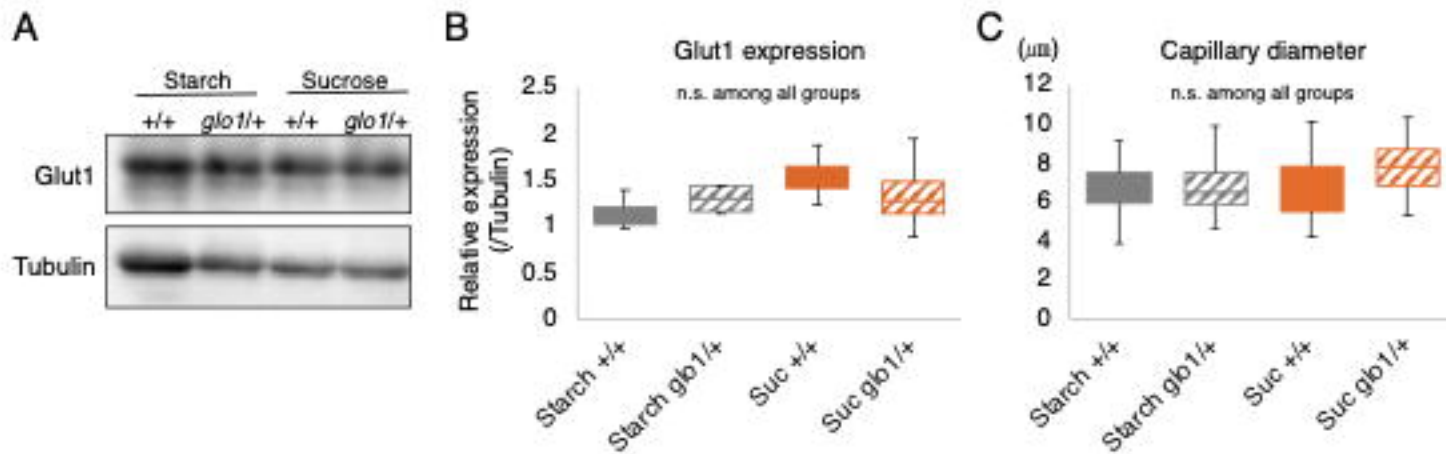

**Supplementary Figure 6 Blood vessels Characterization in the four groups.**

(A) Western blot analysis of glucose transporter 1 (Glut1) protein expression using tubulin as internal control. The cerebral cortex, including the hippocampus, was used as loading sample. (B) Densitometric analysis of Glut1 protein expression (n = 3 mice per group). To quantify expression, Glut1 band intensities in (A) were divided by the intensities of the corresponding tubulin bands. (C) Measurement of capillary diameter. Vessels <10  $\mu$ m in diameter were defined as capillaries, and the mean diameter of 10 randomly selected capillaries per image measured in Fig. 4C (n = 3 mice per group). All data are presented as mean  $\pm$  SEM.



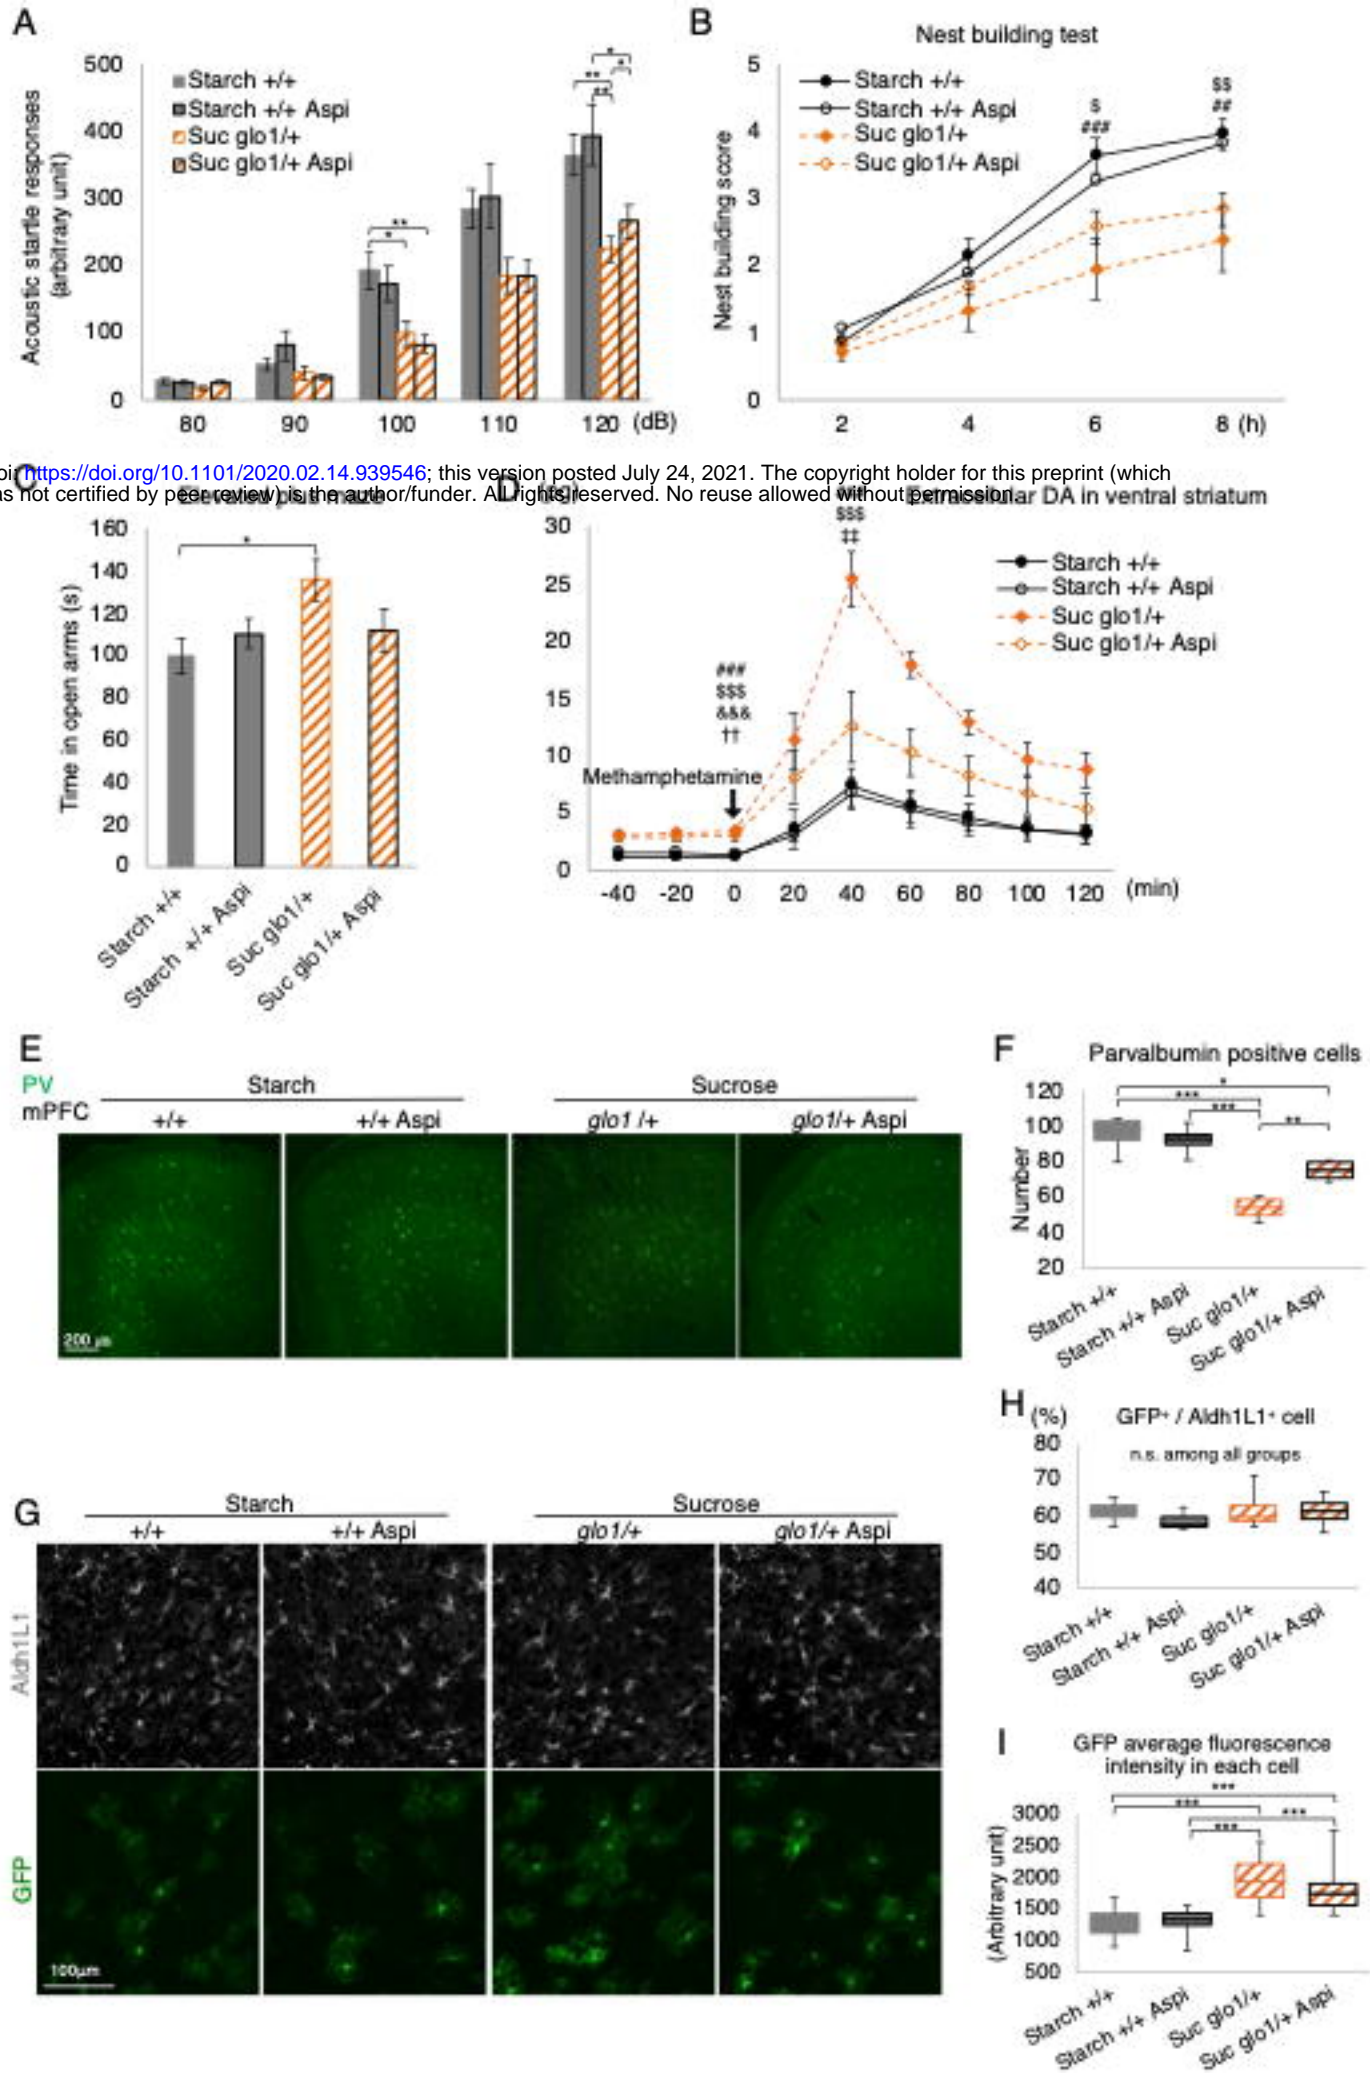

bioRxiv preprint doi: <https://doi.org/10.1101/2020.02.14.939546>; this version posted July 24, 2021. The copyright holder for this preprint (which was not certified by peer review) is the author/funder. All rights reserved. No reuse allowed without permission.

**Supplementary Figure 7 Protective effects of aspirin against the development of psychiatric phenotypes in G × E mice.**

(A–C) Effects of aspirin treatment on the acoustic startle response (A), nest-building skill (B), elevated plus maze test performance (C) and dopamine concentration (D). (E) Parvalbumin (PV) Immunohistochemistry in the medial prefrontal cortex (mPFC). (F) Number of PV-positive cells in the mPFC ( $n = 4$  mice per group). (G) Immunohistological images of GFP-positive astrocytes and ALDH1L1 in the mPFC region. (H) Percentage of GFP-positive cells per total ALDH1L1-positive cells in each image in (G). (I) Mean fluorescence GFP intensities of 10 randomly selected cells per image in (G) (from four independent mice). In (B), post hoc Tukey's multiple comparisons test of groups at specific time points,  $^{***}p < 0.001$ ,  $^{**}p < 0.01$  for Starch +/+ vs. Suc *glo1*+/+ Aspi,  $^{SS}p < 0.01$ ,  $^{S}p < 0.05$  for Starch +/+ Aspi vs. Suc *glo1*+/+ Aspi. In (D), post hoc Bonferroni's multiple comparisons test of groups at specific time points (0 min and 40 min),  $^{***}p < 0.001$  for Suc *glo1*+/+ vs. Starch +/+,  $^{SSS}p < 0.001$  for Suc *glo1*+/+ vs. Starch +/+ Aspi,  $^{&&&p} < 0.001$  for Suc *glo1*+/+ Aspi vs. Starch +/+,  $^{††}p < 0.01$  for Suc *glo1*+/+ Aspi vs. Suc *glo1*+/+,  $^{††}p < 0.01$  for Suc *glo1*+/+ Aspi vs. Starch +/+ Aspi. All data are presented as mean  $\pm$  SEM.  $^{***}p < 0.001$ ,  $^{**}p < 0.01$ ,  $^{*}p < 0.05$

bioRxiv preprint doi: <https://doi.org/10.1101/2020.02.14.939546>; this version posted July 24, 2021. The copyright holder for this preprint (which was not certified by peer review) is the author/funder. All rights reserved. No reuse allowed without permission.

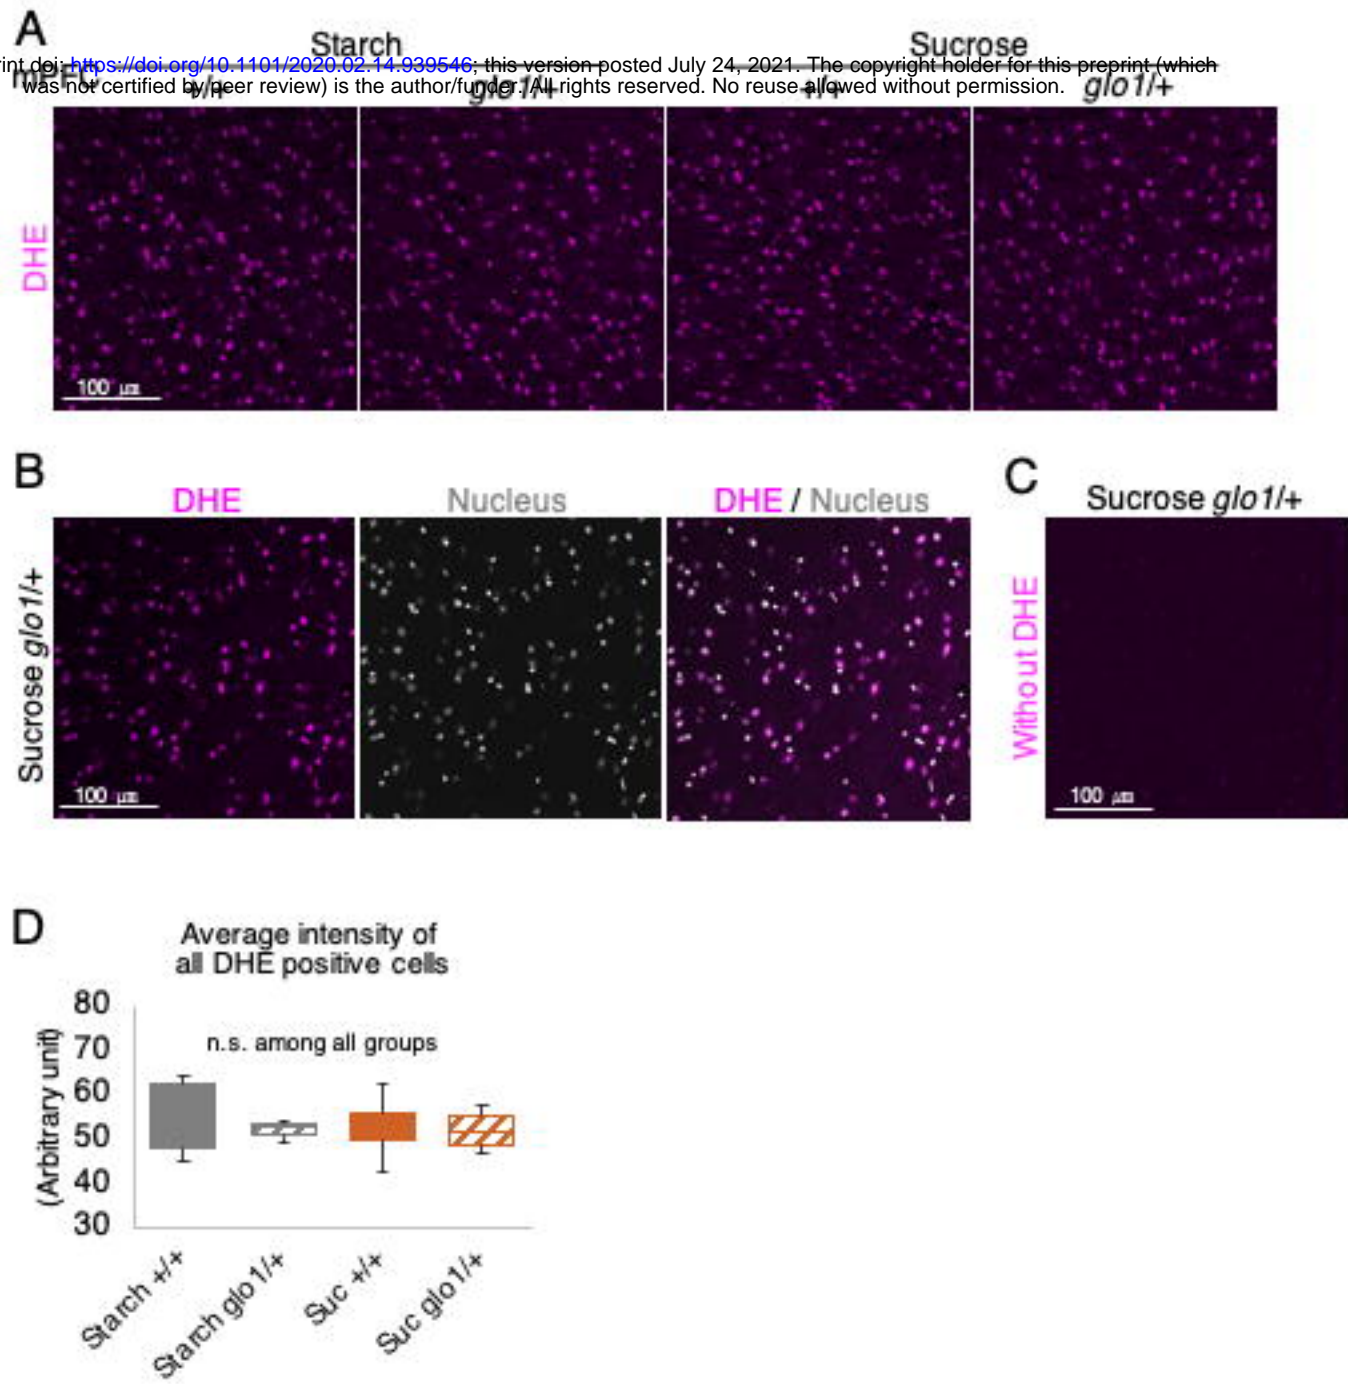

**Supplementary Figure 8 ROS detection in the four groups.**

(A) Reactive oxygen species (ROS) detection with *dihydroethidium* (DHE). (B) Merged DHE/Nucleus (TO-PRO 3) image. All cells are DHE positive, according to nucleus images. (C) ROS detection images without DHE. (D) Fluorescent intensity of DHE positive cells in (A). The mean DHE fluorescent intensity of each cell was measured in each section (n = 4 mice per group). All data are presented as mean  $\pm$  SEM.
